# Supplementary material
Source: Royal Society of Chemistry journal article supplement (doi:10.1039/d6ta02865a)
Supplement: d6ta02865a1.pdf [file d6ta02865a1.pdf]

## Supporting Information

### **Thermal Transport in SrSnO<sub>3</sub> Revealed by First-principles Theory, Raman Thermometry and Machine Learning**

Santosh Kumar Sahu<sup>1</sup>, Sandip Kumar Padhi<sup>1</sup>, Rasmi Ranjan Mohapatra<sup>1</sup>, and Prahallad Padhan<sup>1,2,\*</sup>

*<sup>1</sup>Department of Physics, Nanoscale Physics Laboratory, Indian Institute of Technology Madras, Chennai 600036, India*

*<sup>2</sup>Functional Oxides Research Group, Indian Institute of Technology Madras, Chennai 600036, India*

\* Corresponding author at: Department of Physics, Indian Institute of Technology Madras, Chennai 600036, India

Email addresses: [padhan@iitm.ac.in](mailto:padhan@iitm.ac.in)

Table S1 Rietveld refinement parameters (a, b, c,  $\chi^2$ ,  $R_p$ ,  $R_{wp}$ , and  $R_{exp}$ ) for the XRD patterns and mass density calculated from Archimedes' method for SrSnO<sub>3</sub>.

| Parameters                            | Symbol    | Value for SrSnO <sub>3</sub> |
|---------------------------------------|-----------|------------------------------|
| Lattice Parameter                     | a         | 5.7 (Å)                      |
| Lattice Parameter                     | b         | 5.7 (Å)                      |
| Lattice Parameter                     | c         | 8.07 (Å)                     |
| Goodness of Fit                       | $\chi^2$  | 5.77                         |
| Fit residuals profile factor          | $R_p$     | 7.44 (%)                     |
| Fit residuals weighted profile factor | $R_{wp}$  | 6.3 (%)                      |
| Fit residuals expected profile factor | $R_{exp}$ | 2.62 (%)                     |
| Physical Property                     | Density   | 6.44 (gm/cm <sup>3</sup> )   |

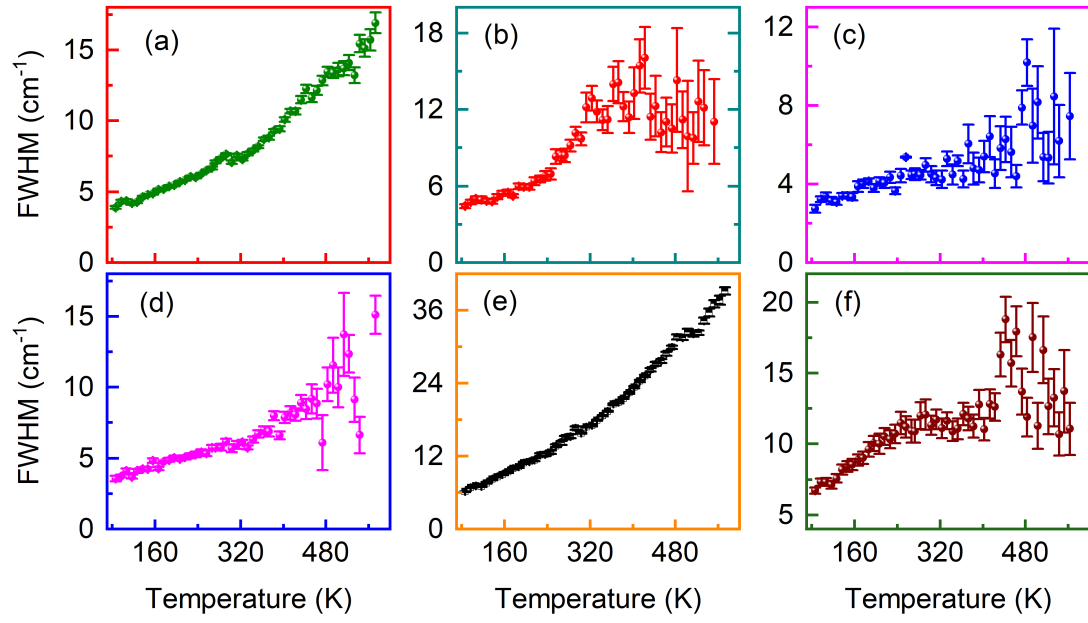

Fig. S1. Temperature-dependent full-width at half-maximum for the Raman modes (a)  $A_g^1$ , (b)  $B_{2g}$ , (c)  $B_{1g}$ , (d)  $A_g^2$ , (e)  $A_g^3$ , and (f)  $B_{3g}$  of  $\text{SrSnO}_3$ .

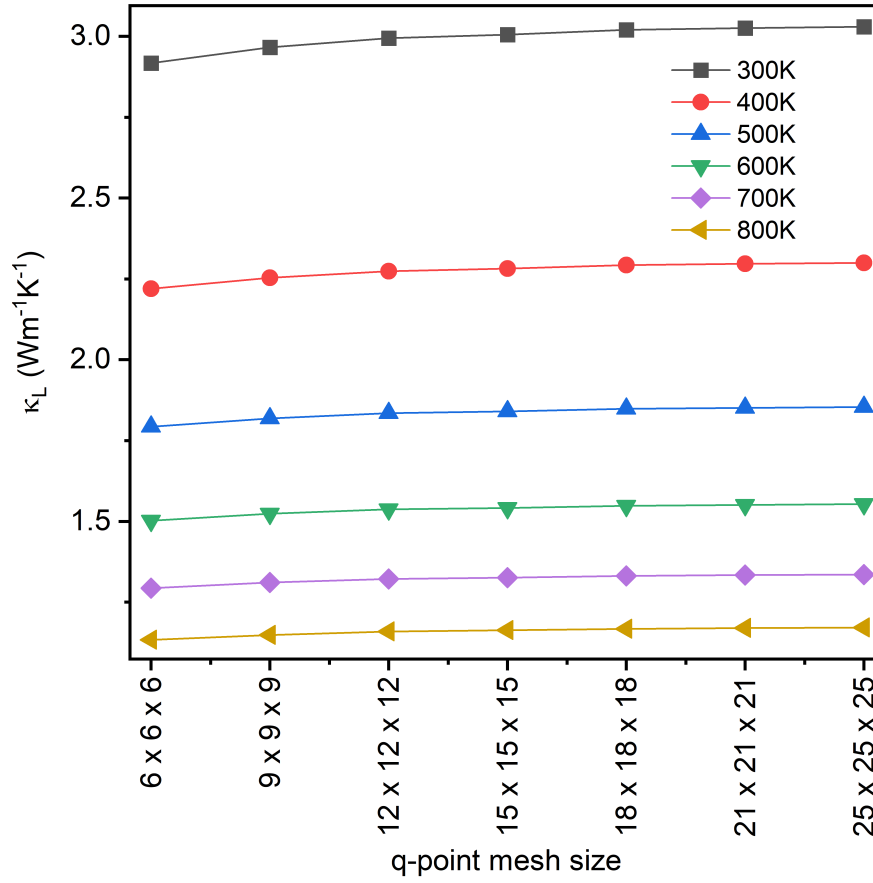

Fig. S2: Variation of lattice thermal conductivity with the q-point mesh size for SrSnO<sub>3</sub>.

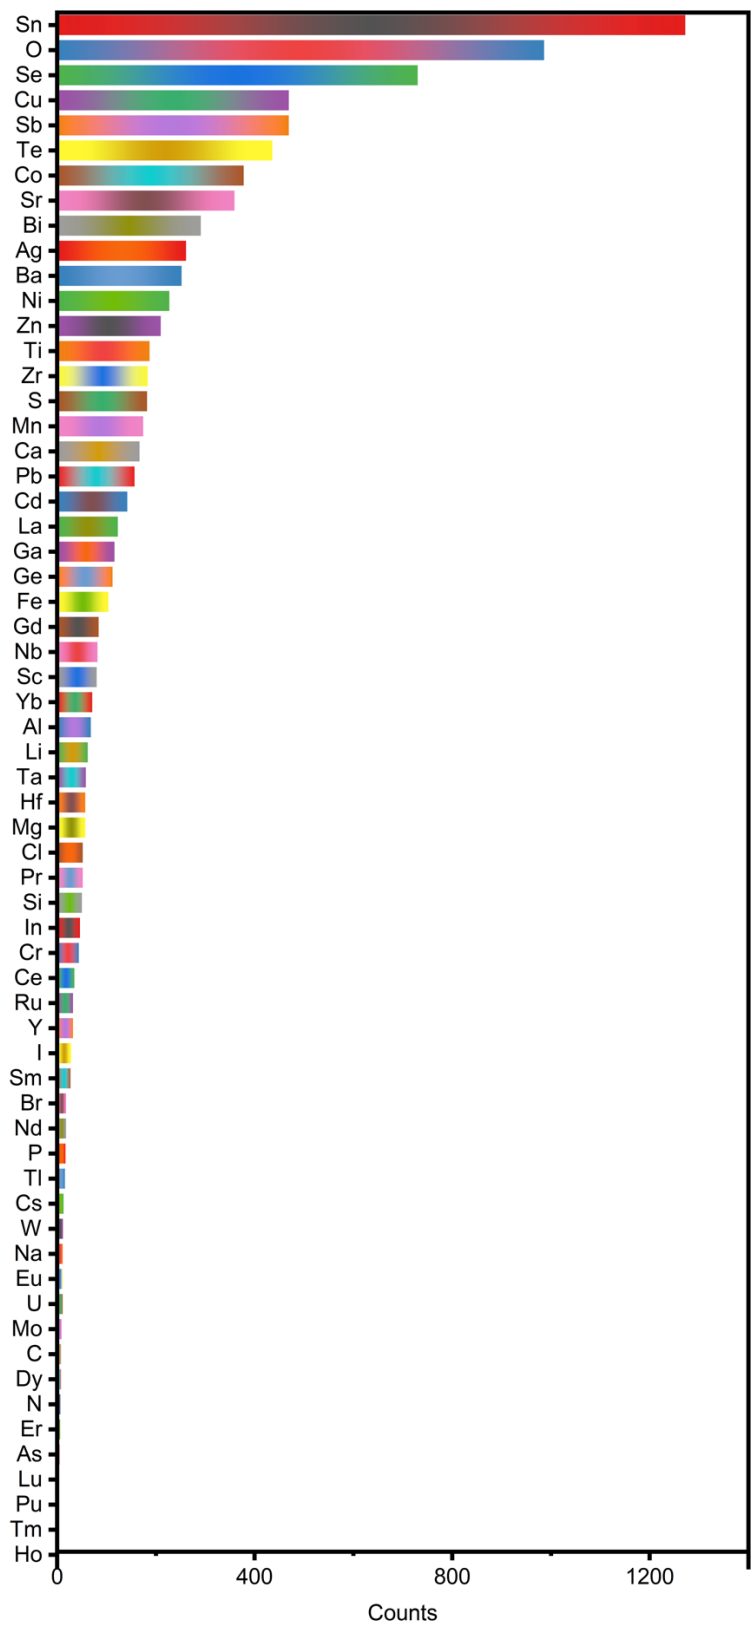

Fig. S3: Frequency of each element in the collected thermoelectric materials.

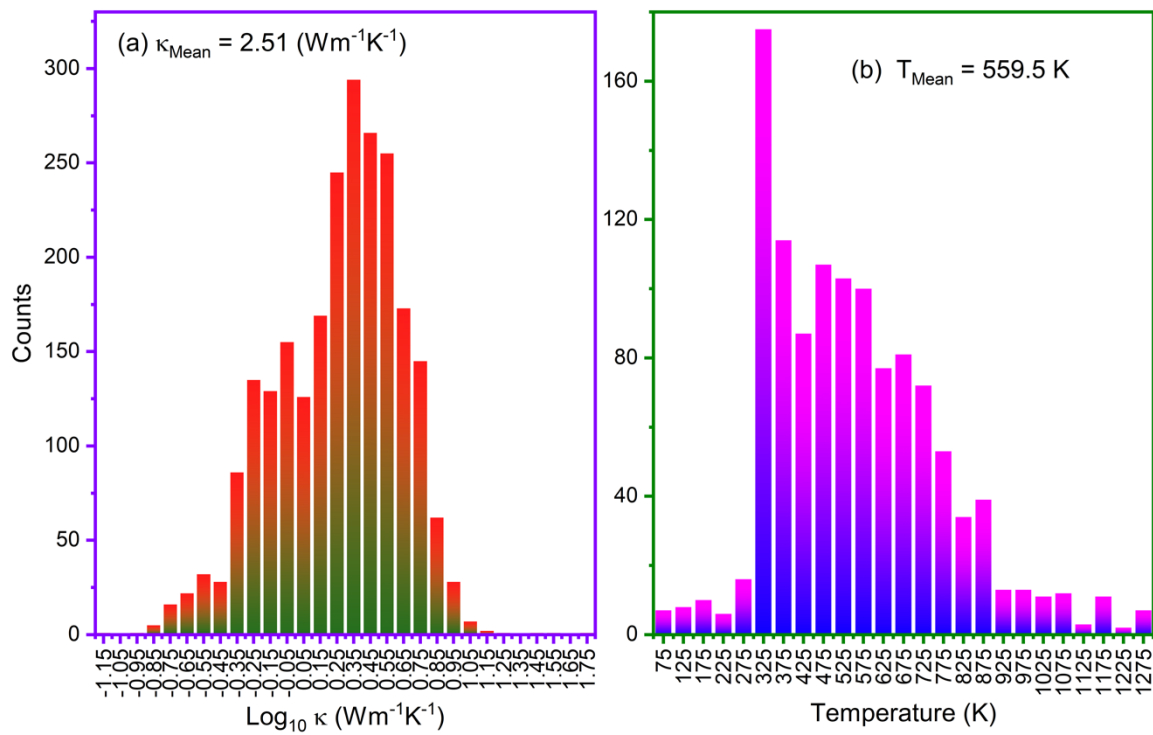

Fig. S4. Distribution of thermoelectric parameters, (a) thermal conductivity, (b) temperature of different compounds.

Table S2 Physical meanings and definitions of the machine learning descriptors.

| Descriptor Label               | Physical Meaning / Definition                                                           |
|--------------------------------|-----------------------------------------------------------------------------------------|
| 0 norm                         | Number of non-zero elemental fractions in the compound.                                 |
| 2 norm                         | Euclidean distribution of elemental fractions.                                          |
| 3, 5, 7 norm                   | Higher-order mathematical norms that emphasize dominant elemental fractions.            |
| Yang omega                     | Mixing thermochemistry feature capturing competitive effects of entropy and enthalpy.   |
| Yang delta                     | Atomic size mismatch among constituent elements in the material.                        |
| LUMO_energy                    | Energy of the Lowest Unoccupied Molecular Orbital (LUMO) of the material.               |
| LUMO_element_O                 | Indicates that the LUMO is primarily localized on/associated with the oxygen (O) atoms. |
| DemlData maximum boiling_point | Highest elemental boiling point among all constituent elements.                         |
| DemlData range boiling_point   | Difference between the maximum and minimum elemental boiling points.                    |
| DemlData mean boiling_point    | Composition-weighted average boiling point of all constituent elements.                 |
| DemlData range heat_fusion     | Difference between the maximum and minimum elemental heats of fusion.                   |
| DemlData mean heat_fusion      | Composition-weighted average heat of fusion of all constituent elements.                |

|                                        |                                                                          |
|----------------------------------------|--------------------------------------------------------------------------|
| DemlData std_dev melting_point         | Standard deviation of melting points of the constituent elements.        |
| DemlData maximum atom_num              | Largest atomic number among the constituent elements.                    |
| DemlData std_dev atom_num              | Standard deviation of atomic numbers among the constituent elements.     |
| DemlData std_dev atom mass / atom_mass | Standard deviation of atomic masses of the constituent elements.         |
| DemlData std_dev atom_radius           | Standard deviation of atomic radii of the constituent elements.          |
| DemlData mean row_num                  | Composition-weighted average periodic table row number (period).         |
| DemlData minimum first_ioniz           | Smallest first ionization energy among all constituent elements.         |
| MagpieData mean AtomicWeight           | Composition-weighted average atomic mass.                                |
| MagpieData avg_dev AtomicWeight        | Average deviation of atomic weights among the constituent elements.      |
| MagpieData avg_dev Number / number     | Average deviation of atomic numbers among the constituent elements.      |
| MagpieData minimum CovalentRadius      | Smallest covalent radius among all constituent elements in the compound. |
| MagpieData maximum SpaceGroupNumber    | Highest elemental space group number among all constituent elements.     |
| MagpieData mean SpaceGroupNumber       | Composition-weighted average of the elemental space group numbers.       |

|                                        |                                                                                          |
|----------------------------------------|------------------------------------------------------------------------------------------|
| MagpieData range<br>SpaceGroupNumber   | Difference between the maximum and minimum elemental space group numbers.                |
| MagpieData avg_dev<br>SpaceGroupNumber | Average deviation of elemental space group numbers from their composition-weighted mean. |
| MagpieData avg_dev Row                 | Average deviation of periodic table row numbers among the constituent elements.          |
| MagpieData mean NUnfilled              | Composition-weighted average number of unfilled valence electrons.                       |
| MagpieData maximum NpUnfilled          | Maximum number of unfilled p-orbital electrons among constituent elements.               |
| MagpieData range NpUnfilled            | Difference between the maximum and minimum number of unfilled p-orbital electrons.       |
| MagpieData ave_dev NpUnfilled          | Average deviation in the number of unfilled p-orbital electrons.                         |
| MagpieData mode Npvalence              | Most common (mode) number of valence p electrons among constituent elements.             |
| MagpieData ave_dev NpValence           | Average deviation in the number of valence p electrons.                                  |
| MagpieData maximum NdUnfilled          | Maximum number of unfilled d-orbital electrons among constituent elements.               |
| MagpieData avg_dev NfValence           | Average deviation in the number of valence f electrons among constituent elements.       |

Table S3: Thermal conductivity of different compounds measured at various temperatures.

| Formula | T(K) | $\kappa$ ( $\text{Wm}^{-1}\text{K}^{-1}$ ) | Formula                                                | T(K) | $\kappa$ ( $\text{Wm}^{-1}\text{K}^{-1}$ ) |
|---------|------|--------------------------------------------|--------------------------------------------------------|------|--------------------------------------------|
| SnS     | 300  | 3.28                                       | Ba <sub>1.9</sub> Bi <sub>0.1</sub> CoRuO <sub>6</sub> | 518  | 1.37                                       |
| SnS     | 423  | 2.16                                       | Ba <sub>1.9</sub> Bi <sub>0.1</sub> CoRuO <sub>6</sub> | 618  | 1.31                                       |
| SnS     | 573  | 1.47                                       | Ca <sub>0.1</sub> BaGd <sub>1.9</sub> NiO <sub>5</sub> | 421  | 2.42                                       |
| SnS     | 723  | 1.03                                       | Ca <sub>0.1</sub> BaGd <sub>1.9</sub> NiO <sub>5</sub> | 532  | 2.2                                        |
| SnS     | 873  | 0.73                                       | Ca <sub>0.1</sub> BaGd <sub>1.9</sub> NiO <sub>5</sub> | 636  | 2.06                                       |
| SnS     | 300  | 1.41                                       | Ca <sub>0.1</sub> BaGd <sub>1.9</sub> NiO <sub>5</sub> | 736  | 1.98                                       |
| SnS     | 400  | 1.09                                       | Ca <sub>0.1</sub> BaGd <sub>1.9</sub> NiO <sub>5</sub> | 839  | 1.92                                       |
| SnS     | 500  | 0.88                                       | Ca <sub>0.1</sub> BaGd <sub>1.9</sub> NiO <sub>5</sub> | 939  | 1.88                                       |
| SnS     | 600  | 0.79                                       | Ca <sub>0.1</sub> BaGd <sub>1.9</sub> NiO <sub>5</sub> | 1037 | 1.83                                       |
| SnS     | 700  | 0.75                                       | Ca <sub>0.1</sub> BaGd <sub>1.9</sub> NiO <sub>5</sub> | 1134 | 1.76                                       |
| SnS     | 800  | 0.7                                        | Ca <sub>0.2</sub> BaGd <sub>1.8</sub> NiO <sub>5</sub> | 489  | 1.65                                       |
| SrO     | 300  | 12                                         | Ca <sub>0.2</sub> BaGd <sub>1.8</sub> NiO <sub>5</sub> | 587  | 1.65                                       |
| SrO     | 450  | 9.56                                       | Ca <sub>0.2</sub> BaGd <sub>1.8</sub> NiO <sub>5</sub> | 693  | 1.66                                       |
| SrO     | 700  | 6.77                                       | Ca <sub>0.2</sub> BaGd <sub>1.8</sub> NiO <sub>5</sub> | 796  | 1.63                                       |
| SrO     | 950  | 5.06                                       | Ca <sub>0.2</sub> BaGd <sub>1.8</sub> NiO <sub>5</sub> | 897  | 1.58                                       |
| SrO     | 550  | 7.56                                       | Ca <sub>0.2</sub> BaGd <sub>1.8</sub> NiO <sub>5</sub> | 999  | 1.53                                       |
| SrO     | 750  | 6.11                                       | Ca <sub>0.2</sub> BaGd <sub>1.8</sub> NiO <sub>5</sub> | 1095 | 1.51                                       |
| SrO     | 650  | 6.88                                       | Ca <sub>0.2</sub> BaGd <sub>1.8</sub> NiO <sub>5</sub> | 1188 | 1.54                                       |
| SrO     | 850  | 5.79                                       | Ca <sub>0.2</sub> BaGd <sub>1.8</sub> NiO <sub>5</sub> | 1275 | 1.63                                       |
| SnTe    | 300  | 7.95                                       | LiCo <sub>0.85</sub> Ni <sub>0.15</sub> O <sub>2</sub> | 323  | 1.69                                       |
| SnTe    | 400  | 7.37                                       | LiCo <sub>0.85</sub> Ni <sub>0.15</sub> O <sub>2</sub> | 423  | 2.03                                       |
| SnTe    | 500  | 6.55                                       | LiCo <sub>0.85</sub> Ni <sub>0.15</sub> O <sub>2</sub> | 523  | 2.05                                       |
| SnTe    | 600  | 5.61                                       | LiCo <sub>0.85</sub> Ni <sub>0.15</sub> O <sub>2</sub> | 623  | 1.94                                       |
| SnTe    | 298  | 6.5                                        | LiCo <sub>0.85</sub> Ni <sub>0.15</sub> O <sub>2</sub> | 723  | 1.67                                       |
| SnTe    | 373  | 6                                          | LiCo <sub>0.85</sub> Ni <sub>0.15</sub> O <sub>2</sub> | 823  | 1.48                                       |
| SnTe    | 473  | 5.39                                       | LiCo <sub>0.85</sub> Ni <sub>0.15</sub> O <sub>2</sub> | 923  | 1.45                                       |
| SnTe    | 573  | 5.2                                        | LiCo <sub>0.85</sub> Ni <sub>0.15</sub> O <sub>2</sub> | 1023 | 1.4                                        |
| SnTe    | 673  | 4.79                                       | LiCo <sub>0.92</sub> Ni <sub>0.08</sub> O <sub>2</sub> | 423  | 1.41                                       |
| SnTe    | 773  | 4.09                                       | LiCo <sub>0.92</sub> Ni <sub>0.08</sub> O <sub>2</sub> | 523  | 1.57                                       |
| SnTe    | 873  | 3.6                                        | LiCo <sub>0.92</sub> Ni <sub>0.08</sub> O <sub>2</sub> | 623  | 1.48                                       |

|      |     |       |  |                                                                     |      |      |
|------|-----|-------|--|---------------------------------------------------------------------|------|------|
| SnSe | 323 | 0.88  |  | LiCo <sub>0.92</sub> Ni <sub>0.08</sub> O <sub>2</sub>              | 723  | 1.41 |
| SnSe | 373 | 0.77  |  | LiCo <sub>0.92</sub> Ni <sub>0.08</sub> O <sub>2</sub>              | 823  | 1.2  |
| SnSe | 423 | 0.69  |  | LiCo <sub>0.92</sub> Ni <sub>0.08</sub> O <sub>2</sub>              | 923  | 1.23 |
| SnSe | 523 | 0.6   |  | LiCo <sub>0.92</sub> Ni <sub>0.08</sub> O <sub>2</sub>              | 1023 | 1.4  |
| SnSe | 573 | 0.62  |  | LiCo <sub>0.96</sub> Ni <sub>0.04</sub> O <sub>2</sub>              | 323  | 2.03 |
| SnSe | 473 | 0.67  |  | LiCo <sub>0.96</sub> Ni <sub>0.04</sub> O <sub>2</sub>              | 423  | 2.23 |
| SnSe | 623 | 0.59  |  | LiCo <sub>0.96</sub> Ni <sub>0.04</sub> O <sub>2</sub>              | 523  | 1.98 |
| SnSe | 673 | 0.51  |  | LiCo <sub>0.96</sub> Ni <sub>0.04</sub> O <sub>2</sub>              | 623  | 1.77 |
| SnSe | 723 | 0.58  |  | LiCo <sub>0.96</sub> Ni <sub>0.04</sub> O <sub>2</sub>              | 723  | 1.76 |
| SnSe | 773 | 0.56  |  | LiCo <sub>0.96</sub> Ni <sub>0.04</sub> O <sub>2</sub>              | 823  | 1.58 |
| SnTe | 323 | 10.29 |  | LiCo <sub>0.96</sub> Ni <sub>0.04</sub> O <sub>2</sub>              | 923  | 1.47 |
| SnTe | 373 | 9.84  |  | LiCo <sub>0.96</sub> Ni <sub>0.04</sub> O <sub>2</sub>              | 1023 | 1.61 |
| SnTe | 423 | 9.3   |  | LiCo <sub>0.98</sub> Ni <sub>0.02</sub> O <sub>2</sub>              | 323  | 2.25 |
| SnTe | 473 | 8.85  |  | LiCo <sub>0.98</sub> Ni <sub>0.02</sub> O <sub>2</sub>              | 423  | 2.49 |
| SnTe | 523 | 8.3   |  | LiCo <sub>0.98</sub> Ni <sub>0.02</sub> O <sub>2</sub>              | 523  | 2.41 |
| SnTe | 573 | 7.67  |  | LiCo <sub>0.98</sub> Ni <sub>0.02</sub> O <sub>2</sub>              | 623  | 2.3  |
| SnTe | 623 | 6.95  |  | LiCo <sub>0.98</sub> Ni <sub>0.02</sub> O <sub>2</sub>              | 723  | 2.07 |
| SnTe | 673 | 6.22  |  | LiCo <sub>0.98</sub> Ni <sub>0.02</sub> O <sub>2</sub>              | 823  | 1.97 |
| SnTe | 723 | 5.53  |  | LiCo <sub>0.98</sub> Ni <sub>0.02</sub> O <sub>2</sub>              | 923  | 1.58 |
| SnTe | 773 | 4.87  |  | LiCo <sub>0.98</sub> Ni <sub>0.02</sub> O <sub>2</sub>              | 1023 | 1.41 |
| SnSe | 300 | 1.4   |  | Ag <sub>8</sub> Sn <sub>0.4</sub> Ga <sub>0.6</sub> Se <sub>6</sub> | 328  | 0.21 |
| SnSe | 373 | 1.15  |  | Ag <sub>8</sub> Sn <sub>0.4</sub> Ga <sub>0.6</sub> Se <sub>6</sub> | 376  | 0.23 |
| SnSe | 423 | 1.02  |  | Ag <sub>8</sub> Sn <sub>0.4</sub> Ga <sub>0.6</sub> Se <sub>6</sub> | 474  | 0.27 |
| SnSe | 473 | 0.9   |  | Ag <sub>8</sub> Sn <sub>0.4</sub> Ga <sub>0.6</sub> Se <sub>6</sub> | 573  | 0.28 |
| SnSe | 573 | 0.73  |  | Ag <sub>8</sub> Sn <sub>0.4</sub> Ga <sub>0.6</sub> Se <sub>6</sub> | 671  | 0.3  |
| SnSe | 673 | 0.62  |  | Ag <sub>8</sub> Sn <sub>0.4</sub> Ga <sub>0.6</sub> Se <sub>6</sub> | 710  | 0.29 |
| SnSe | 723 | 0.61  |  | Ag <sub>8</sub> Sn <sub>0.4</sub> Ga <sub>0.6</sub> Se <sub>6</sub> | 720  | 0.31 |
| SnSe | 823 | 0.64  |  | Ag <sub>8</sub> Sn <sub>0.5</sub> Ga <sub>0.5</sub> Se <sub>6</sub> | 313  | 0.21 |
| SnSe | 873 | 0.64  |  | Ag <sub>8</sub> Sn <sub>0.5</sub> Ga <sub>0.5</sub> Se <sub>6</sub> | 388  | 0.22 |
| SnTe | 323 | 8.59  |  | Ag <sub>8</sub> Sn <sub>0.5</sub> Ga <sub>0.5</sub> Se <sub>6</sub> | 477  | 0.25 |
| SnTe | 423 | 7.27  |  | Ag <sub>8</sub> Sn <sub>0.5</sub> Ga <sub>0.5</sub> Se <sub>6</sub> | 576  | 0.27 |
| SnTe | 523 | 5.89  |  | Ag <sub>8</sub> Sn <sub>0.5</sub> Ga <sub>0.5</sub> Se <sub>6</sub> | 673  | 0.3  |

|      |     |      |  |                  |     |      |
|------|-----|------|--|------------------|-----|------|
| SnTe | 623 | 4.56 |  | Ag8Sn0.5Ga0.5Se6 | 702 | 0.29 |
| SnTe | 673 | 3.96 |  | Ag8Sn0.5Ga0.5Se6 | 732 | 0.3  |
| SnTe | 723 | 3.44 |  | Ag8Sn0.6Ga0.4Se6 | 330 | 0.21 |
| SnTe | 773 | 3.03 |  | Ag8Sn0.6Ga0.4Se6 | 426 | 0.25 |
| SnTe | 330 | 8.07 |  | Ag8Sn0.6Ga0.4Se6 | 523 | 0.26 |
| SnTe | 421 | 6.95 |  | Ag8Sn0.6Ga0.4Se6 | 601 | 0.3  |
| SnTe | 519 | 5.67 |  | Ag8Sn0.6Ga0.4Se6 | 640 | 0.3  |
| SnTe | 616 | 4.43 |  | Ag8Sn0.6Ga0.4Se6 | 691 | 0.3  |
| SnTe | 714 | 3.33 |  | Ag8Sn0.7Ga0.3Se6 | 313 | 0.22 |
| SnTe | 763 | 2.93 |  | Ag8Sn0.7Ga0.3Se6 | 426 | 0.24 |
| SnSe | 300 | 2.33 |  | Ag8Sn0.7Ga0.3Se6 | 474 | 0.26 |
| SnSe | 373 | 1.77 |  | Ag8Sn0.7Ga0.3Se6 | 572 | 0.28 |
| SnSe | 473 | 1.29 |  | Ag8Sn0.7Ga0.3Se6 | 640 | 0.32 |
| SnSe | 573 | 1.05 |  | Ag8Sn0.7Ga0.3Se6 | 673 | 0.36 |
| SnSe | 673 | 0.89 |  | Ag8Sn0.7Ga0.3Se6 | 694 | 0.38 |
| SnSe | 773 | 0.6  |  | Ti0.995Al0.005O2 | 296 | 7    |
| TiO2 | 296 | 6.3  |  | CaMn0.98Nb0.02O3 | 380 | 2.55 |
| SnSe | 300 | 1.73 |  | CaMn0.98Nb0.02O3 | 430 | 2.41 |
| SnSe | 373 | 1.41 |  | CaMn0.98Nb0.02O3 | 480 | 2.24 |
| SnSe | 473 | 1.08 |  | CaMn0.98Nb0.02O3 | 530 | 2.09 |
| SnSe | 573 | 0.9  |  | CaMn0.98Nb0.02O3 | 580 | 1.97 |
| SnSe | 673 | 0.74 |  | CaMn0.98Nb0.02O3 | 630 | 1.89 |
| SnSe | 773 | 0.63 |  | CaMn0.98Nb0.02O3 | 680 | 1.8  |
| SnSe | 373 | 0.76 |  | CaMn0.95Nb0.05O3 | 380 | 2.77 |
| SnSe | 473 | 0.6  |  | CaMn0.95Nb0.05O3 | 430 | 2.75 |
| SnSe | 573 | 0.51 |  | CaMn0.95Nb0.05O3 | 480 | 2.68 |
| SnSe | 673 | 0.43 |  | CaMn0.95Nb0.05O3 | 530 | 2.59 |
| SnSe | 773 | 0.38 |  | CaMn0.95Nb0.05O3 | 580 | 2.54 |
| SnSe | 873 | 0.28 |  | CaMn0.95Nb0.05O3 | 630 | 2.45 |
| SnSe | 373 | 0.76 |  | CaMn0.95Nb0.05O3 | 680 | 2.37 |
| SnSe | 473 | 0.61 |  | CaMn0.92Nb0.08O3 | 380 | 2    |
| SnSe | 573 | 0.5  |  | CaMn0.92Nb0.08O3 | 430 | 1.95 |

|                  |     |      |  |                                                        |     |       |
|------------------|-----|------|--|--------------------------------------------------------|-----|-------|
| SnSe             | 673 | 0.43 |  | CaMn <sub>0.92</sub> Nb <sub>0.08</sub> O <sub>3</sub> | 480 | 1.94  |
| SnSe             | 773 | 0.38 |  | CaMn <sub>0.92</sub> Nb <sub>0.08</sub> O <sub>3</sub> | 530 | 1.89  |
| SnSe             | 873 | 0.38 |  | CaMn <sub>0.92</sub> Nb <sub>0.08</sub> O <sub>3</sub> | 580 | 1.86  |
| SnSe             | 325 | 1.11 |  | CaMn <sub>0.92</sub> Nb <sub>0.08</sub> O <sub>3</sub> | 630 | 1.79  |
| SnSe             | 335 | 1.07 |  | CaMn <sub>0.92</sub> Nb <sub>0.08</sub> O <sub>3</sub> | 680 | 1.72  |
| SnSe             | 345 | 1.04 |  | Pr <sub>1.8</sub> Sr <sub>0.2</sub> CoFeO <sub>6</sub> | 380 | 0.66  |
| SnSe             | 355 | 1.01 |  | Pr <sub>1.8</sub> Sr <sub>0.2</sub> CoFeO <sub>6</sub> | 480 | 0.59  |
| SnSe             | 365 | 0.98 |  | Pr <sub>1.8</sub> Sr <sub>0.2</sub> CoFeO <sub>6</sub> | 580 | 0.56  |
| SnSe             | 400 | 0.87 |  | Pr <sub>1.8</sub> Sr <sub>0.2</sub> CoFeO <sub>6</sub> | 680 | 0.55  |
| SnSe             | 430 | 0.81 |  | Pr <sub>1.6</sub> Sr <sub>0.4</sub> CoFeO <sub>6</sub> | 380 | 0.63  |
| SnSe             | 460 | 0.76 |  | Pr <sub>1.6</sub> Sr <sub>0.4</sub> CoFeO <sub>6</sub> | 480 | 0.61  |
| SnSe             | 500 | 0.71 |  | Pr <sub>1.6</sub> Sr <sub>0.4</sub> CoFeO <sub>6</sub> | 580 | 0.64  |
| SnSe             | 550 | 0.66 |  | Pr <sub>1.6</sub> Sr <sub>0.4</sub> CoFeO <sub>6</sub> | 680 | 0.69  |
| SnSe             | 600 | 0.62 |  | Ba <sub>0.95</sub> Sr <sub>0.05</sub> TiO <sub>3</sub> | 300 | 2.35  |
| SnSe             | 650 | 0.59 |  | Ba <sub>0.85</sub> Sr <sub>0.15</sub> TiO <sub>3</sub> | 300 | 3.72  |
| SnSe             | 700 | 0.56 |  | Sr <sub>0.95</sub> La <sub>0.05</sub> SnO <sub>3</sub> | 300 | 4.25  |
| ZrO <sub>2</sub> | 550 | 4.83 |  | Sr <sub>0.95</sub> La <sub>0.05</sub> SnO <sub>3</sub> | 480 | 3.36  |
| ZrO <sub>2</sub> | 600 | 4.62 |  | Sr <sub>0.95</sub> La <sub>0.05</sub> SnO <sub>3</sub> | 580 | 3.12  |
| ZrO <sub>2</sub> | 650 | 4.42 |  | Sr <sub>0.95</sub> La <sub>0.05</sub> SnO <sub>3</sub> | 680 | 3.07  |
| ZrO <sub>2</sub> | 700 | 4.31 |  | Sr <sub>0.95</sub> La <sub>0.05</sub> SnO <sub>3</sub> | 780 | 2.89  |
| YPO <sub>4</sub> | 373 | 7.16 |  | Sr <sub>0.97</sub> La <sub>0.03</sub> SnO <sub>3</sub> | 300 | 4.48  |
| YPO <sub>4</sub> | 473 | 5.8  |  | Sr <sub>0.97</sub> La <sub>0.03</sub> SnO <sub>3</sub> | 480 | 3.77  |
| YPO <sub>4</sub> | 573 | 4.85 |  | Sr <sub>0.97</sub> La <sub>0.03</sub> SnO <sub>3</sub> | 580 | 3.46  |
| YPO <sub>4</sub> | 673 | 4.17 |  | Sr <sub>0.97</sub> La <sub>0.03</sub> SnO <sub>3</sub> | 680 | 3.27  |
| YPO <sub>4</sub> | 773 | 3.67 |  | Sr <sub>0.97</sub> La <sub>0.03</sub> SnO <sub>3</sub> | 780 | 3.25  |
| HfO <sub>2</sub> | 300 | 2.3  |  | La <sub>0.83</sub> Sr <sub>0.17</sub> MnO <sub>3</sub> | 100 | 3.91  |
| SiO <sub>2</sub> | 300 | 1.4  |  | La <sub>0.83</sub> Sr <sub>0.17</sub> MnO <sub>3</sub> | 150 | 3.88  |
| TiO <sub>2</sub> | 300 | 2.8  |  | La <sub>0.83</sub> Sr <sub>0.17</sub> MnO <sub>3</sub> | 200 | 3.43  |
| TiO <sub>2</sub> | 340 | 2.73 |  | La <sub>0.83</sub> Sr <sub>0.17</sub> MnO <sub>3</sub> | 250 | 2.98  |
| TiO <sub>2</sub> | 390 | 2.56 |  | La <sub>0.83</sub> Sr <sub>0.17</sub> MnO <sub>3</sub> | 300 | 2.2   |
| TiO <sub>2</sub> | 440 | 2.45 |  | La <sub>0.95</sub> Ag <sub>0.05</sub> MnO <sub>3</sub> | 300 | 9.8   |
| TiO <sub>2</sub> | 490 | 2.43 |  | La <sub>0.85</sub> Ag <sub>0.15</sub> MnO <sub>3</sub> | 300 | 10.22 |

|       |      |       |  |                   |     |       |
|-------|------|-------|--|-------------------|-----|-------|
| TiO2  | 540  | 2.45  |  | La0.75Ag0.25MnO3  | 300 | 11.71 |
| BaUO3 | 300  | 1     |  | Pr1.5Sr0.5FeCrO6  | 300 | 0.85  |
| BaUO3 | 370  | 1     |  | Pr1.5Sr0.5FeCrO6  | 380 | 0.82  |
| BaUO3 | 470  | 1.09  |  | Pr1.5Sr0.5FeCrO6  | 460 | 0.8   |
| BaUO3 | 570  | 1.045 |  | Pr1.5Sr0.5FeCrO6  | 520 | 0.78  |
| BaUO3 | 680  | 1.04  |  | Pr1.5Sr0.5FeCrO6  | 580 | 0.76  |
| BaUO3 | 780  | 1.13  |  | Pr1.5Sr0.5FeCrO6  | 640 | 0.75  |
| BaUO3 | 880  | 1.09  |  | Pr1.5Sr0.5FeCrO6  | 700 | 0.75  |
| BaUO3 | 980  | 1.27  |  | Cu2.05Cd0.95SnSe4 | 300 | 2.34  |
| BaUO3 | 1070 | 1.18  |  | Cu2.05Cd0.95SnSe4 | 350 | 1.95  |
| BaUO3 | 1160 | 1.22  |  | Cu2.05Cd0.95SnSe4 | 400 | 1.68  |
| BaUO3 | 1260 | 1.18  |  | Cu2.05Cd0.95SnSe4 | 450 | 1.39  |
| SrCO3 | 260  | 10.88 |  | Cu2.05Cd0.95SnSe4 | 500 | 1.15  |
| SrCO3 | 400  | 9.24  |  | Cu2.05Cd0.95SnSe4 | 550 | 0.96  |
| SrCO3 | 500  | 7.44  |  | Cu2.05Cd0.95SnSe4 | 600 | 0.83  |
| SrCO3 | 620  | 6.65  |  | Cu2.05Cd0.95SnSe4 | 650 | 0.7   |
| SrCO3 | 660  | 6.38  |  | Cu2.05Cd0.95SnSe4 | 700 | 0.61  |
| SrCO3 | 720  | 6.08  |  | Cu2Sn0.95Zn0.05S3 | 323 | 1.59  |
| SrCO3 | 820  | 5.74  |  | Cu2Sn0.95Zn0.05S3 | 423 | 1.21  |
| SrCO3 | 920  | 5.25  |  | Cu2Sn0.95Zn0.05S3 | 523 | 0.96  |
| LaPO4 | 300  | 3.54  |  | Cu2Sn0.95Zn0.05S3 | 623 | 0.76  |
| LaPO4 | 350  | 3.24  |  | Cu2Sn0.95Zn0.05S3 | 723 | 0.49  |
| LaPO4 | 400  | 2.91  |  | Bi0.92Ag0.08CuSeO | 323 | 0.53  |
| LaPO4 | 450  | 2.63  |  | Bi0.92Ag0.08CuSeO | 373 | 0.53  |
| LaPO4 | 500  | 2.39  |  | Bi0.92Ag0.08CuSeO | 423 | 0.48  |
| LaPO4 | 550  | 2.21  |  | Bi0.92Ag0.08CuSeO | 473 | 0.45  |
| LaPO4 | 600  | 2.08  |  | Bi0.92Ag0.08CuSeO | 523 | 0.44  |
| GdPO4 | 373  | 2.57  |  | Bi0.92Ag0.08CuSeO | 573 | 0.43  |
| GdPO4 | 473  | 2.12  |  | Bi0.92Ag0.08CuSeO | 673 | 0.43  |
| GdPO4 | 573  | 1.85  |  | Bi0.92Ag0.08CuSeO | 723 | 0.41  |
| GdPO4 | 673  | 1.73  |  | Bi0.92Ag0.08CuSeO | 773 | 0.4   |
| GdPO4 | 773  | 1.71  |  | Bi0.94Ag0.06CuSeO | 323 | 0.55  |

|        |      |      |  |                   |     |      |
|--------|------|------|--|-------------------|-----|------|
| Fe2O3  | 300  | 7    |  | Bi0.94Ag0.06CuSeO | 373 | 0.55 |
| LaCoO3 | 300  | 0.43 |  | Bi0.94Ag0.06CuSeO | 423 | 0.52 |
| CaTiO3 | 321  | 4.69 |  | Bi0.94Ag0.06CuSeO | 473 | 0.5  |
| CaTiO3 | 538  | 3.67 |  | Bi0.94Ag0.06CuSeO | 523 | 0.49 |
| CaTiO3 | 432  | 4.03 |  | Bi0.94Ag0.06CuSeO | 573 | 0.48 |
| CaTiO3 | 640  | 3.46 |  | Bi0.94Ag0.06CuSeO | 673 | 0.49 |
| CaTiO3 | 740  | 3.35 |  | Bi0.96Ag0.04CuSeO | 323 | 0.58 |
| CaTiO3 | 840  | 3.14 |  | Bi0.96Ag0.04CuSeO | 373 | 0.57 |
| CaTiO3 | 1016 | 2.75 |  | Bi0.96Ag0.04CuSeO | 423 | 0.54 |
| TiNiSn | 297  | 4.7  |  | Bi0.96Ag0.04CuSeO | 473 | 0.53 |
| TiNiSn | 398  | 4.69 |  | Bi0.96Ag0.04CuSeO | 523 | 0.52 |
| TiNiSn | 498  | 4.8  |  | Bi0.96Ag0.04CuSeO | 573 | 0.51 |
| TiNiSn | 598  | 5.09 |  | Bi0.96Ag0.04CuSeO | 623 | 0.52 |
| TiNiSn | 697  | 5.26 |  | Bi0.96Ag0.04CuSeO | 723 | 0.49 |
| TiNiSn | 797  | 5.68 |  | Bi0.96Ag0.04CuSeO | 823 | 0.47 |
| TiNiSn | 871  | 6.32 |  | Bi0.96Ag0.04CuSeO | 873 | 0.47 |
| LiCoO2 | 423  | 7.59 |  | Cu5Sn2S6.65Cl0.35 | 300 | 2.84 |
| LiCoO2 | 523  | 5.9  |  | Cu5Sn2S6.65Cl0.35 | 415 | 2.4  |
| LiCoO2 | 623  | 4.55 |  | Cu5Sn2S6.65Cl0.35 | 515 | 2.13 |
| LiCoO2 | 723  | 4.01 |  | Cu5Sn2S6.65Cl0.35 | 617 | 1.85 |
| LiCoO2 | 823  | 3.32 |  | Cu5Sn2S6.65Cl0.35 | 667 | 1.74 |
| LiCoO2 | 923  | 2.67 |  | Bi0.95Ba0.05CuSeO | 319 | 0.93 |
| LiCoO2 | 1023 | 2.72 |  | Bi0.95Ba0.05CuSeO | 420 | 0.77 |
| TiNiSn | 323  | 4.38 |  | Bi0.95Ba0.05CuSeO | 522 | 0.7  |
| TiNiSn | 424  | 4.1  |  | Bi0.95Ba0.05CuSeO | 623 | 0.65 |
| TiNiSn | 526  | 4.05 |  | Bi0.95Ba0.05CuSeO | 725 | 0.63 |
| TiNiSn | 630  | 4.02 |  | Bi0.95Ba0.05CuSeO | 825 | 0.6  |
| TiNiSn | 735  | 4.14 |  | Cu1.85Ag0.15SnSe3 | 300 | 0.98 |
| ZrNiSn | 376  | 4.22 |  | Cu1.85Ag0.15SnSe3 | 400 | 0.7  |
| ZrNiSn | 474  | 3.74 |  | Cu1.85Ag0.15SnSe3 | 500 | 0.54 |
| ZrNiSn | 573  | 3.57 |  | Cu1.85Ag0.15SnSe3 | 600 | 0.41 |
| ZrNiSn | 673  | 3.49 |  | Cu1.85Ag0.15SnSe3 | 700 | 0.35 |

|                    |      |      |  |                                                          |     |      |
|--------------------|------|------|--|----------------------------------------------------------|-----|------|
| ZrNiSn             | 771  | 3.59 |  | Cu <sub>1.85</sub> Ag <sub>0.15</sub> SnSe <sub>3</sub>  | 800 | 0.31 |
| ZrNiSn             | 873  | 3.71 |  | Bi <sub>0.98</sub> Pb <sub>0.02</sub> CuSeO              | 50  | 3.91 |
| ZrNiSn             | 972  | 3.95 |  | Bi <sub>0.98</sub> Pb <sub>0.02</sub> CuSeO              | 100 | 2.64 |
| SrHfO <sub>3</sub> | 300  | 5.27 |  | Bi <sub>0.98</sub> Pb <sub>0.02</sub> CuSeO              | 150 | 2.1  |
| SrHfO <sub>3</sub> | 370  | 4.09 |  | Bi <sub>0.98</sub> Pb <sub>0.02</sub> CuSeO              | 250 | 1.72 |
| SrHfO <sub>3</sub> | 460  | 3.5  |  | Bi <sub>0.96</sub> Pb <sub>0.04</sub> CuSeO              | 50  | 2.79 |
| SrHfO <sub>3</sub> | 570  | 3.18 |  | Bi <sub>0.96</sub> Pb <sub>0.04</sub> CuSeO              | 100 | 2.34 |
| SrHfO <sub>3</sub> | 670  | 2.95 |  | Bi <sub>0.96</sub> Pb <sub>0.04</sub> CuSeO              | 150 | 2.05 |
| SrHfO <sub>3</sub> | 770  | 2.81 |  | Bi <sub>0.96</sub> Pb <sub>0.04</sub> CuSeO              | 250 | 1.71 |
| SrHfO <sub>3</sub> | 860  | 2.63 |  | Bi <sub>0.94</sub> Pb <sub>0.06</sub> CuSeO              | 50  | 2.17 |
| SrHfO <sub>3</sub> | 960  | 2.72 |  | Bi <sub>0.94</sub> Pb <sub>0.06</sub> CuSeO              | 100 | 2.17 |
| SrHfO <sub>3</sub> | 1060 | 2.9  |  | Bi <sub>0.94</sub> Pb <sub>0.06</sub> CuSeO              | 150 | 1.94 |
| SrHfO <sub>3</sub> | 1160 | 3    |  | Bi <sub>0.94</sub> Pb <sub>0.06</sub> CuSeO              | 250 | 1.72 |
| SrHfO <sub>3</sub> | 1250 | 3.04 |  | Bi <sub>0.92</sub> Pb <sub>0.08</sub> CuSeO              | 50  | 2    |
| SrRuO <sub>3</sub> | 300  | 6.04 |  | Bi <sub>0.92</sub> Pb <sub>0.08</sub> CuSeO              | 100 | 2.1  |
| SrRuO <sub>3</sub> | 370  | 5.86 |  | Bi <sub>0.92</sub> Pb <sub>0.08</sub> CuSeO              | 150 | 2.05 |
| SrRuO <sub>3</sub> | 480  | 5.95 |  | Bi <sub>0.92</sub> Pb <sub>0.08</sub> CuSeO              | 250 | 2    |
| SrRuO <sub>3</sub> | 580  | 6    |  | Mg <sub>2</sub> Sn <sub>0.995</sub> Sb <sub>0.005</sub>  | 350 | 5.11 |
| SrRuO <sub>3</sub> | 670  | 6.22 |  | Mg <sub>2</sub> Sn <sub>0.995</sub> Sb <sub>0.005</sub>  | 444 | 4.08 |
| SrRuO <sub>3</sub> | 770  | 6.59 |  | Mg <sub>2</sub> Sn <sub>0.995</sub> Sb <sub>0.005</sub>  | 544 | 4.11 |
| SrRuO <sub>3</sub> | 880  | 6.86 |  | Mg <sub>2</sub> Sn <sub>0.995</sub> Sb <sub>0.005</sub>  | 646 | 4.3  |
| SrRuO <sub>3</sub> | 980  | 7.45 |  | GeTe <sub>80</sub> (AgSnSe <sub>2</sub> ) <sub>20</sub>  | 300 | 0.51 |
| SrRuO <sub>3</sub> | 1080 | 8.04 |  | Sr <sub>14.1</sub> Ga <sub>29.6</sub> Ge <sub>56.3</sub> | 367 | 1.47 |
| SrRuO <sub>3</sub> | 1180 | 8.36 |  | Sr <sub>14.1</sub> Ga <sub>29.6</sub> Ge <sub>56.3</sub> | 774 | 1.89 |
| SrRuO <sub>3</sub> | 1260 | 8.63 |  | Sr <sub>14.1</sub> Ga <sub>29.6</sub> Ge <sub>56.3</sub> | 463 | 1.51 |
| SrTiO <sub>3</sub> | 300  | 9    |  | Sr <sub>14.1</sub> Ga <sub>29.6</sub> Ge <sub>56.3</sub> | 568 | 1.74 |
| SrTiO <sub>3</sub> | 330  | 8.63 |  | Sr <sub>14.1</sub> Ga <sub>29.6</sub> Ge <sub>56.3</sub> | 669 | 1.62 |
| SrTiO <sub>3</sub> | 370  | 8.01 |  | Sr <sub>14.5</sub> Ga <sub>29.2</sub> Ge <sub>56.3</sub> | 367 | 1.6  |
| SrTiO <sub>3</sub> | 450  | 6.84 |  | Sr <sub>14.5</sub> Ga <sub>29.2</sub> Ge <sub>56.3</sub> | 463 | 1.57 |
| SrTiO <sub>3</sub> | 560  | 5.95 |  | Sr <sub>14.5</sub> Ga <sub>29.2</sub> Ge <sub>56.3</sub> | 564 | 1.8  |
| SrTiO <sub>3</sub> | 660  | 5.27 |  | Sr <sub>14.5</sub> Ga <sub>29.2</sub> Ge <sub>56.3</sub> | 669 | 1.68 |
| SrTiO <sub>3</sub> | 760  | 4.9  |  | Sr <sub>14.5</sub> Ga <sub>29.2</sub> Ge <sub>56.3</sub> | 774 | 1.75 |

|        |      |      |  |                    |      |      |
|--------|------|------|--|--------------------|------|------|
| SrTiO3 | 870  | 4.5  |  | Sr14.7Ga28.7Ge56.6 | 563  | 1.74 |
| SrTiO3 | 970  | 4.18 |  | Sr14.7Ga28.7Ge56.6 | 666  | 1.53 |
| SrTiO3 | 1060 | 3.68 |  | Sr14.7Ga28.7Ge56.6 | 772  | 1.51 |
| BaZrO3 | 290  | 5.24 |  | Sr14.8Ga28.6Ge56.6 | 408  | 2.15 |
| BaZrO3 | 380  | 4.21 |  | Sr14.8Ga28.6Ge56.6 | 510  | 2.16 |
| BaZrO3 | 490  | 3.54 |  | Sr14.8Ga28.6Ge56.6 | 613  | 2.41 |
| BaZrO3 | 590  | 3.26 |  | Sr14.8Ga28.6Ge56.6 | 711  | 2.23 |
| BaZrO3 | 690  | 3.02 |  | Ca0.05BaGd1.95NiO5 | 526  | 1.86 |
| BaZrO3 | 790  | 2.85 |  | Ca0.05BaGd1.95NiO5 | 632  | 1.68 |
| BaZrO3 | 890  | 2.66 |  | Ca0.05BaGd1.95NiO5 | 736  | 1.57 |
| BaZrO3 | 990  | 2.58 |  | Ca0.05BaGd1.95NiO5 | 839  | 1.5  |
| BaZrO3 | 1090 | 2.56 |  | Ca0.05BaGd1.95NiO5 | 939  | 1.44 |
| BaZrO3 | 1190 | 2.66 |  | Ca0.05BaGd1.95NiO5 | 1037 | 1.38 |
| BaZrO3 | 1290 | 2.77 |  | Ca0.05BaGd1.95NiO5 | 1134 | 1.3  |
| BaCeO3 | 290  | 1.71 |  | Ca0.05BaGd1.95NiO5 | 1230 | 1.28 |
| BaCeO3 | 370  | 1.51 |  | Ca0.15BaGd1.85NiO5 | 392  | 2.3  |
| BaCeO3 | 470  | 1.27 |  | Ca0.15BaGd1.85NiO5 | 513  | 2.04 |
| BaCeO3 | 570  | 1.21 |  | Ca0.15BaGd1.85NiO5 | 611  | 1.95 |
| BaCeO3 | 680  | 1.13 |  | Ca0.15BaGd1.85NiO5 | 716  | 1.86 |
| BaCeO3 | 780  | 1.17 |  | Ca0.15BaGd1.85NiO5 | 811  | 1.78 |
| BaCeO3 | 880  | 1.13 |  | Ca0.15BaGd1.85NiO5 | 907  | 1.72 |
| BaCeO3 | 980  | 1.09 |  | Ca0.15BaGd1.85NiO5 | 1000 | 1.66 |
| SrZrO3 | 473  | 2.86 |  | Ca0.15BaGd1.85NiO5 | 1084 | 1.62 |
| SrZrO3 | 500  | 2.82 |  | Ca0.15BaGd1.85NiO5 | 1179 | 1.6  |
| SrZrO3 | 550  | 2.69 |  | Ca0.15BaGd1.85NiO5 | 1275 | 1.57 |
| SrZrO3 | 600  | 2.58 |  | Ca0.25BaGd1.75NiO5 | 486  | 1.27 |
| BaPuO3 | 300  | 1    |  | Ca0.25BaGd1.75NiO5 | 579  | 1.3  |
| BaPuO3 | 470  | 1.04 |  | Ca0.25BaGd1.75NiO5 | 687  | 1.33 |
| BaPuO3 | 670  | 1.02 |  | Ca0.25BaGd1.75NiO5 | 791  | 1.35 |
| BaPuO3 | 870  | 0.96 |  | Ca0.25BaGd1.75NiO5 | 891  | 1.31 |
| Ba3SiO | 300  | 1.01 |  | Ca0.25BaGd1.75NiO5 | 987  | 1.28 |
| Ba3SiO | 330  | 0.96 |  | Ca0.25BaGd1.75NiO5 | 1087 | 1.26 |

|                     |     |      |  |                                                                       |      |      |
|---------------------|-----|------|--|-----------------------------------------------------------------------|------|------|
| Ba <sub>3</sub> SiO | 350 | 0.87 |  | Ca <sub>0.25</sub> BaGd <sub>1.75</sub> NiO <sub>5</sub>              | 1179 | 1.28 |
| Ba <sub>3</sub> SiO | 380 | 0.86 |  | Ca <sub>0.25</sub> BaGd <sub>1.75</sub> NiO <sub>5</sub>              | 1275 | 1.25 |
| Ba <sub>3</sub> SiO | 400 | 0.84 |  | Sn <sub>1.03</sub> Se <sub>0.08</sub> Te <sub>0.92</sub>              | 323  | 6.31 |
| Ba <sub>3</sub> SiO | 420 | 0.82 |  | Sn <sub>1.03</sub> Se <sub>0.08</sub> Te <sub>0.92</sub>              | 423  | 5.43 |
| Ba <sub>3</sub> SiO | 450 | 0.81 |  | Sn <sub>1.03</sub> Se <sub>0.08</sub> Te <sub>0.92</sub>              | 523  | 4.38 |
| Ba <sub>3</sub> SiO | 470 | 0.8  |  | Sn <sub>1.03</sub> Se <sub>0.08</sub> Te <sub>0.92</sub>              | 623  | 3.44 |
| Ba <sub>3</sub> SiO | 500 | 0.7  |  | Sn <sub>1.03</sub> Se <sub>0.08</sub> Te <sub>0.92</sub>              | 723  | 2.7  |
| Ba <sub>3</sub> SiO | 520 | 0.77 |  | Sn <sub>1.03</sub> Se <sub>0.08</sub> Te <sub>0.92</sub>              | 823  | 2.52 |
| Ba <sub>3</sub> SiO | 550 | 0.75 |  | Sn <sub>1.03</sub> Se <sub>0.12</sub> Te <sub>0.88</sub>              | 323  | 5.16 |
| Ba <sub>3</sub> SiO | 570 | 0.72 |  | Sn <sub>1.03</sub> Se <sub>0.12</sub> Te <sub>0.88</sub>              | 423  | 4.46 |
| Ba <sub>3</sub> SiO | 600 | 0.71 |  | Sn <sub>1.03</sub> Se <sub>0.12</sub> Te <sub>0.88</sub>              | 523  | 3.65 |
| Ba <sub>3</sub> GeO | 300 | 0.83 |  | Sn <sub>1.03</sub> Se <sub>0.12</sub> Te <sub>0.88</sub>              | 623  | 2.89 |
| Ba <sub>3</sub> GeO | 330 | 0.77 |  | Sn <sub>1.03</sub> Se <sub>0.12</sub> Te <sub>0.88</sub>              | 723  | 2.3  |
| Ba <sub>3</sub> GeO | 350 | 0.72 |  | Sn <sub>1.03</sub> Se <sub>0.12</sub> Te <sub>0.88</sub>              | 823  | 2.23 |
| Ba <sub>3</sub> GeO | 380 | 0.68 |  | Sn <sub>1.03</sub> Se <sub>0.15</sub> Te <sub>0.85</sub>              | 323  | 4.87 |
| Ba <sub>3</sub> GeO | 400 | 0.63 |  | Sn <sub>1.03</sub> Se <sub>0.15</sub> Te <sub>0.85</sub>              | 423  | 4.28 |
| Ba <sub>3</sub> GeO | 430 | 0.6  |  | Sn <sub>1.03</sub> Se <sub>0.15</sub> Te <sub>0.85</sub>              | 523  | 3.53 |
| Ba <sub>3</sub> GeO | 450 | 0.56 |  | Sn <sub>1.03</sub> Se <sub>0.15</sub> Te <sub>0.85</sub>              | 623  | 2.79 |
| Ba <sub>3</sub> GeO | 470 | 0.53 |  | Sn <sub>1.03</sub> Se <sub>0.15</sub> Te <sub>0.85</sub>              | 723  | 2.25 |
| Ba <sub>3</sub> GeO | 500 | 0.5  |  | Sn <sub>1.03</sub> Se <sub>0.15</sub> Te <sub>0.85</sub>              | 823  | 2.17 |
| Ba <sub>3</sub> GeO | 520 | 0.47 |  | Cu <sub>2</sub> Zn <sub>0.2</sub> Fe <sub>0.8</sub> SnSe <sub>4</sub> | 373  | 1.74 |
| Ba <sub>3</sub> GeO | 540 | 0.45 |  | Cu <sub>2</sub> Zn <sub>0.2</sub> Fe <sub>0.8</sub> SnSe <sub>4</sub> | 473  | 1.28 |
| Ba <sub>3</sub> GeO | 570 | 0.42 |  | Cu <sub>2</sub> Zn <sub>0.2</sub> Fe <sub>0.8</sub> SnSe <sub>4</sub> | 573  | 0.93 |
| Ba <sub>3</sub> GeO | 600 | 0.42 |  | Cu <sub>2</sub> Zn <sub>0.2</sub> Fe <sub>0.8</sub> SnSe <sub>4</sub> | 673  | 0.78 |
| CaZrO <sub>3</sub>  | 560 | 2.24 |  | Cu <sub>2</sub> Zn <sub>0.2</sub> Fe <sub>0.8</sub> SnSe <sub>4</sub> | 773  | 0.69 |
| CaZrO <sub>3</sub>  | 630 | 2.15 |  | Cu <sub>2</sub> Zn <sub>0.4</sub> Fe <sub>0.6</sub> SnSe <sub>4</sub> | 373  | 1.92 |
| CaZrO <sub>3</sub>  | 690 | 2.1  |  | Cu <sub>2</sub> Zn <sub>0.4</sub> Fe <sub>0.6</sub> SnSe <sub>4</sub> | 473  | 1.43 |
| CaZrO <sub>3</sub>  | 750 | 2.07 |  | Cu <sub>2</sub> Zn <sub>0.4</sub> Fe <sub>0.6</sub> SnSe <sub>4</sub> | 573  | 1.06 |
| CsSnI <sub>3</sub>  | 85  | 0.88 |  | Cu <sub>2</sub> Zn <sub>0.4</sub> Fe <sub>0.6</sub> SnSe <sub>4</sub> | 673  | 0.86 |
| CsSnI <sub>3</sub>  | 100 | 0.84 |  | Cu <sub>2</sub> Zn <sub>0.4</sub> Fe <sub>0.6</sub> SnSe <sub>4</sub> | 773  | 0.71 |
| CsSnI <sub>3</sub>  | 120 | 0.75 |  | Cu <sub>2</sub> Zn <sub>0.6</sub> Fe <sub>0.4</sub> SnSe <sub>4</sub> | 373  | 2.49 |
| CsSnI <sub>3</sub>  | 150 | 0.53 |  | Cu <sub>2</sub> Zn <sub>0.6</sub> Fe <sub>0.4</sub> SnSe <sub>4</sub> | 473  | 1.76 |

|         |     |      |  |                    |     |      |
|---------|-----|------|--|--------------------|-----|------|
| Y2SiO5  | 300 | 3.47 |  | Cu2Zn0.6Fe0.4SnSe4 | 573 | 1.28 |
| Y2SiO5  | 470 | 2.54 |  | Cu2Zn0.6Fe0.4SnSe4 | 673 | 1.03 |
| Y2SiO5  | 670 | 2.07 |  | Cu2Zn0.6Fe0.4SnSe4 | 773 | 0.85 |
| BaTiO3  | 300 | 2.24 |  | Cu2Zn0.8Fe0.2SnSe4 | 373 | 2.5  |
| LaCrO3  | 300 | 4.2  |  | Cu2Zn0.8Fe0.2SnSe4 | 473 | 1.54 |
| LaCrO3  | 400 | 3.45 |  | Cu2Zn0.8Fe0.2SnSe4 | 573 | 1.04 |
| LaCrO3  | 500 | 2.89 |  | Cu2Zn0.8Fe0.2SnSe4 | 673 | 0.81 |
| LaCrO3  | 600 | 2.71 |  | Cu2Zn0.8Fe0.2SnSe4 | 773 | 0.67 |
| LaCrO3  | 700 | 2.47 |  | Cu2Sn0.95Fe0.05Se3 | 323 | 3.43 |
| Cu2SnS3 | 323 | 2.38 |  | Cu2Sn0.95Fe0.05Se3 | 423 | 2.7  |
| Cu2SnS3 | 423 | 1.63 |  | Cu2Sn0.95Fe0.05Se3 | 523 | 2.31 |
| Cu2SnS3 | 523 | 1.23 |  | Cu2Sn0.95Fe0.05Se3 | 623 | 2.02 |
| Cu2SnS3 | 623 | 0.98 |  | Cu2Sn0.95Fe0.05Se3 | 723 | 1.93 |
| Cu2SnS3 | 723 | 0.79 |  | Cu2Sn0.95Fe0.05Se3 | 823 | 1    |
| BiCuSeO | 773 | 0.48 |  | (Zr0.5Hf0.5)3Y4O12 | 373 | 1.86 |
| BiCuSeO | 323 | 0.61 |  | (Zr0.5Hf0.5)3Y4O12 | 473 | 1.75 |
| BiCuSeO | 523 | 0.5  |  | (Zr0.5Hf0.5)3Y4O12 | 573 | 1.69 |
| BiCuSeO | 723 | 0.45 |  | (Zr0.5Hf0.5)3Y4O12 | 673 | 1.67 |
| BiCuSeO | 923 | 0.42 |  | (Zr0.5Hf0.5)3Y4O12 | 773 | 1.67 |
| BiCuSeO | 323 | 0.81 |  | (Sm0.5La0.5)2Zr2O7 | 300 | 1.04 |
| BiCuSeO | 373 | 0.72 |  | (Sm0.5La0.5)2Zr2O7 | 473 | 1.03 |
| BiCuSeO | 423 | 0.66 |  | (Sm0.5La0.5)2Zr2O7 | 673 | 0.96 |
| BiCuSeO | 473 | 0.61 |  | (Sm0.5La0.5)2Zr2O7 | 873 | 0.95 |
| BiCuSeO | 523 | 0.57 |  | Ba0.875Sr0.125TiO3 | 300 | 3.71 |
| BiCuSeO | 573 | 0.54 |  | Pr1.75Sr0.25FeCrO6 | 300 | 0.78 |
| BiCuSeO | 623 | 0.52 |  | Pr1.75Sr0.25FeCrO6 | 380 | 0.79 |
| BiCuSeO | 673 | 0.49 |  | Pr1.75Sr0.25FeCrO6 | 460 | 0.77 |
| BiCuSeO | 723 | 0.48 |  | Pr1.75Sr0.25FeCrO6 | 520 | 0.76 |
| BiCuSeO | 873 | 0.44 |  | Pr1.75Sr0.25FeCrO6 | 580 | 0.74 |
| BiCuSeO | 319 | 0.78 |  | Pr1.75Sr0.25FeCrO6 | 640 | 0.72 |
| BiCuSeO | 420 | 0.69 |  | Pr1.75Sr0.25FeCrO6 | 700 | 0.7  |
| BiCuSeO | 522 | 0.58 |  | Pr1.25Sr0.75FeCrO6 | 300 | 0.87 |

|                                  |     |      |  |                                                                        |     |      |
|----------------------------------|-----|------|--|------------------------------------------------------------------------|-----|------|
| BiCuSeO                          | 623 | 0.55 |  | Pr <sub>1.25</sub> Sr <sub>0.75</sub> FeCrO <sub>6</sub>               | 380 | 0.87 |
| BiCuSeO                          | 725 | 0.54 |  | Pr <sub>1.25</sub> Sr <sub>0.75</sub> FeCrO <sub>6</sub>               | 460 | 0.86 |
| BiCuSeO                          | 825 | 0.53 |  | Pr <sub>1.25</sub> Sr <sub>0.75</sub> FeCrO <sub>6</sub>               | 520 | 0.85 |
| BiCuSeO                          | 347 | 0.6  |  | Pr <sub>1.25</sub> Sr <sub>0.75</sub> FeCrO <sub>6</sub>               | 580 | 0.84 |
| BiCuSeO                          | 446 | 0.54 |  | Pr <sub>1.25</sub> Sr <sub>0.75</sub> FeCrO <sub>6</sub>               | 640 | 0.84 |
| BiCuSeO                          | 542 | 0.5  |  | Cu <sub>2.025</sub> Cd <sub>0.975</sub> SnSe <sub>4</sub>              | 300 | 2.67 |
| BiCuSeO                          | 639 | 0.46 |  | Cu <sub>2.025</sub> Cd <sub>0.975</sub> SnSe <sub>4</sub>              | 350 | 2.24 |
| BiCuSeO                          | 737 | 0.38 |  | Cu <sub>2.025</sub> Cd <sub>0.975</sub> SnSe <sub>4</sub>              | 400 | 1.88 |
| BiCuSeO                          | 839 | 0.38 |  | Cu <sub>2.025</sub> Cd <sub>0.975</sub> SnSe <sub>4</sub>              | 450 | 1.56 |
| BiCuSeO                          | 100 | 2.85 |  | Cu <sub>2.025</sub> Cd <sub>0.975</sub> SnSe <sub>4</sub>              | 500 | 1.31 |
| BiCuSeO                          | 150 | 2.1  |  | Cu <sub>2.025</sub> Cd <sub>0.975</sub> SnSe <sub>4</sub>              | 550 | 1.13 |
| BiCuSeO                          | 250 | 1.54 |  | Cu <sub>2.025</sub> Cd <sub>0.975</sub> SnSe <sub>4</sub>              | 600 | 0.99 |
| Cs <sub>2</sub> MoO <sub>4</sub> | 200 | 0.53 |  | Cu <sub>2.025</sub> Cd <sub>0.975</sub> SnSe <sub>4</sub>              | 650 | 0.85 |
| Cs <sub>2</sub> MoO <sub>4</sub> | 250 | 0.46 |  | Cu <sub>2.025</sub> Cd <sub>0.975</sub> SnSe <sub>4</sub>              | 700 | 0.75 |
| Cs <sub>2</sub> MoO <sub>4</sub> | 300 | 0.41 |  | Bi <sub>0.985</sub> Na <sub>0.015</sub> CuSeO                          | 300 | 0.81 |
| Cs <sub>2</sub> MoO <sub>4</sub> | 350 | 0.38 |  | Bi <sub>0.985</sub> Na <sub>0.015</sub> CuSeO                          | 923 | 0.5  |
| Cs <sub>2</sub> MoO <sub>4</sub> | 400 | 0.35 |  | Sn <sub>0.87</sub> Mn <sub>0.1</sub> Bi <sub>0.03</sub> Te             | 323 | 4.24 |
| Cs <sub>2</sub> MoO <sub>4</sub> | 450 | 0.33 |  | Sn <sub>0.87</sub> Mn <sub>0.1</sub> Bi <sub>0.03</sub> Te             | 373 | 4.08 |
| Cs <sub>2</sub> MoO <sub>4</sub> | 500 | 0.32 |  | Sn <sub>0.87</sub> Mn <sub>0.1</sub> Bi <sub>0.03</sub> Te             | 423 | 4    |
| Cs <sub>2</sub> MoO <sub>4</sub> | 550 | 0.31 |  | Sn <sub>0.87</sub> Mn <sub>0.1</sub> Bi <sub>0.03</sub> Te             | 473 | 3.85 |
| Cs <sub>2</sub> MoO <sub>4</sub> | 600 | 0.31 |  | Sn <sub>0.87</sub> Mn <sub>0.1</sub> Bi <sub>0.03</sub> Te             | 523 | 3.66 |
| CeTa <sub>3</sub> O <sub>9</sub> | 370 | 1.95 |  | Sn <sub>0.87</sub> Mn <sub>0.1</sub> Bi <sub>0.03</sub> Te             | 623 | 3.37 |
| CeTa <sub>3</sub> O <sub>9</sub> | 470 | 1.96 |  | Sn <sub>0.87</sub> Mn <sub>0.1</sub> Bi <sub>0.03</sub> Te             | 773 | 2.67 |
| CeTa <sub>3</sub> O <sub>9</sub> | 570 | 2.1  |  | Cu <sub>22</sub> Sn <sub>9.25</sub> Sb <sub>0.75</sub> S <sub>32</sub> | 300 | 2.86 |
| CeTa <sub>3</sub> O <sub>9</sub> | 670 | 2.19 |  | Cu <sub>22</sub> Sn <sub>9.25</sub> Sb <sub>0.75</sub> S <sub>32</sub> | 400 | 2.45 |
| NdTa <sub>3</sub> O <sub>9</sub> | 370 | 2.01 |  | Cu <sub>22</sub> Sn <sub>9.25</sub> Sb <sub>0.75</sub> S <sub>32</sub> | 500 | 2.15 |
| NdTa <sub>3</sub> O <sub>9</sub> | 470 | 2.08 |  | Cu <sub>22</sub> Sn <sub>9.25</sub> Sb <sub>0.75</sub> S <sub>32</sub> | 600 | 1.89 |
| NdTa <sub>3</sub> O <sub>9</sub> | 570 | 2.13 |  | Cu <sub>22</sub> Sn <sub>9.25</sub> Sb <sub>0.75</sub> S <sub>32</sub> | 700 | 1.66 |
| NdTa <sub>3</sub> O <sub>9</sub> | 670 | 2.17 |  | Li <sub>1.1</sub> Co <sub>0.85</sub> Ni <sub>0.15</sub> O <sub>2</sub> | 323 | 1.94 |
| SmTa <sub>3</sub> O <sub>9</sub> | 370 | 1.59 |  | Li <sub>1.1</sub> Co <sub>0.85</sub> Ni <sub>0.15</sub> O <sub>2</sub> | 423 | 2.8  |
| SmTa <sub>3</sub> O <sub>9</sub> | 470 | 1.61 |  | Li <sub>1.1</sub> Co <sub>0.85</sub> Ni <sub>0.15</sub> O <sub>2</sub> | 523 | 2.72 |
| SmTa <sub>3</sub> O <sub>9</sub> | 570 | 1.73 |  | Li <sub>1.1</sub> Co <sub>0.85</sub> Ni <sub>0.15</sub> O <sub>2</sub> | 623 | 2.45 |

|          |      |      |  |                     |      |      |
|----------|------|------|--|---------------------|------|------|
| SmTa3O9  | 670  | 1.79 |  | Li1.1Co0.85Ni0.15O2 | 723  | 2.19 |
| EuTa3O9  | 370  | 1.5  |  | Li1.1Co0.85Ni0.15O2 | 823  | 1.91 |
| EuTa3O9  | 470  | 1.55 |  | Li1.1Co0.85Ni0.15O2 | 923  | 1.61 |
| EuTa3O9  | 570  | 1.6  |  | Li1.1Co0.85Ni0.15O2 | 1023 | 1.32 |
| EuTa3O9  | 670  | 1.67 |  | Bi0.825Ba0.175CuSeO | 319  | 0.77 |
| Lu2SiO5  | 300  | 3.32 |  | Bi0.825Ba0.175CuSeO | 420  | 0.68 |
| Lu2SiO5  | 470  | 2.43 |  | Bi0.825Ba0.175CuSeO | 522  | 0.63 |
| Lu2SiO5  | 670  | 1.98 |  | Bi0.825Ba0.175CuSeO | 623  | 0.6  |
| Ca3Co4O9 | 300  | 2.87 |  | Bi0.825Ba0.175CuSeO | 725  | 0.59 |
| Ca3Co4O9 | 500  | 2.6  |  | Bi0.825Ba0.175CuSeO | 825  | 0.55 |
| Ca3Co4O9 | 700  | 2.4  |  | Bi0.875Ba0.125CuSeO | 319  | 0.96 |
| Ca3Co4O9 | 900  | 2.26 |  | Bi0.875Ba0.125CuSeO | 420  | 0.86 |
| Ca3Co4O9 | 1000 | 2.21 |  | Bi0.875Ba0.125CuSeO | 522  | 0.78 |
| Cu5Sn2S7 | 300  | 5.51 |  | Bi0.875Ba0.125CuSeO | 623  | 0.74 |
| Cu5Sn2S7 | 422  | 4.24 |  | Bi0.875Ba0.125CuSeO | 725  | 0.72 |
| Cu5Sn2S7 | 524  | 3.64 |  | Bi0.875Ba0.125CuSeO | 825  | 0.69 |
| Cu5Sn2S7 | 627  | 3.13 |  | Cu1.875Ag0.125SnSe3 | 300  | 1.1  |
| Cu5Sn2S7 | 678  | 2.89 |  | Cu1.875Ag0.125SnSe3 | 400  | 0.78 |
| Cu2SnSe3 | 300  | 2.91 |  | Cu1.875Ag0.125SnSe3 | 500  | 0.63 |
| Cu2SnSe3 | 372  | 2.2  |  | Cu1.875Ag0.125SnSe3 | 600  | 0.51 |
| Cu2SnSe3 | 473  | 1.68 |  | Cu1.875Ag0.125SnSe3 | 700  | 0.42 |
| Cu2SnSe3 | 523  | 1.5  |  | Cu1.875Ag0.125SnSe3 | 800  | 0.32 |
| Cu2SnSe3 | 622  | 1.28 |  | Cu1.925Ag0.075SnSe3 | 300  | 1.61 |
| Cu2SnSe3 | 723  | 1.1  |  | Cu1.925Ag0.075SnSe3 | 400  | 1.09 |
| Sn1.03Te | 323  | 9.18 |  | Cu1.925Ag0.075SnSe3 | 500  | 0.83 |
| Sn1.03Te | 423  | 7.86 |  | Cu1.925Ag0.075SnSe3 | 600  | 0.68 |
| Sn1.03Te | 523  | 6.28 |  | Cu1.925Ag0.075SnSe3 | 700  | 0.57 |
| Sn1.03Te | 623  | 4.95 |  | Cu1.925Ag0.075SnSe3 | 800  | 0.55 |
| Sn1.03Te | 723  | 3.7  |  | Sn0.9Pb0.09Zn0.01Se | 300  | 1.27 |
| Sn1.03Te | 823  | 2.86 |  | Sn0.9Pb0.09Zn0.01Se | 373  | 0.98 |
| Cu2SnSe3 | 300  | 2.33 |  | Sn0.9Pb0.09Zn0.01Se | 473  | 0.75 |
| Cu2SnSe3 | 400  | 1.38 |  | Sn0.9Pb0.09Zn0.01Se | 573  | 0.64 |

|                                   |     |      |  |                                                                        |     |      |
|-----------------------------------|-----|------|--|------------------------------------------------------------------------|-----|------|
| Cu <sub>2</sub> SnSe <sub>3</sub> | 500 | 1.06 |  | Sn <sub>0.9</sub> Pb <sub>0.09</sub> Zn <sub>0.01</sub> Se             | 673 | 0.56 |
| Cu <sub>2</sub> SnSe <sub>3</sub> | 600 | 0.9  |  | Sn <sub>0.9</sub> Pb <sub>0.09</sub> Zn <sub>0.01</sub> Se             | 773 | 0.48 |
| Cu <sub>2</sub> SnSe <sub>3</sub> | 700 | 0.8  |  | Bi <sub>2.15</sub> Sr <sub>1.96</sub> Co <sub>2</sub> O <sub>7.7</sub> | 300 | 1.95 |
| Cu <sub>2</sub> SnSe <sub>3</sub> | 800 | 0.74 |  | Bi <sub>2.15</sub> Sr <sub>1.96</sub> Co <sub>2</sub> O <sub>7.7</sub> | 350 | 1.95 |
| Ag <sub>8</sub> SnSe <sub>6</sub> | 330 | 0.21 |  | Bi <sub>2.15</sub> Sr <sub>1.96</sub> Co <sub>2</sub> O <sub>7.7</sub> | 400 | 1.97 |
| Ag <sub>8</sub> SnSe <sub>6</sub> | 426 | 0.26 |  | Bi <sub>2.15</sub> Sr <sub>1.96</sub> Co <sub>2</sub> O <sub>7.7</sub> | 450 | 2.01 |
| Ag <sub>8</sub> SnSe <sub>6</sub> | 523 | 0.31 |  | Bi <sub>2.15</sub> Sr <sub>1.96</sub> Co <sub>2</sub> O <sub>7.7</sub> | 500 | 2.07 |
| Ag <sub>8</sub> SnSe <sub>6</sub> | 601 | 0.36 |  | Bi <sub>2.15</sub> Sr <sub>1.96</sub> Co <sub>2</sub> O <sub>7.7</sub> | 550 | 2.09 |
| Ag <sub>8</sub> SnSe <sub>6</sub> | 640 | 0.41 |  | Bi <sub>2.15</sub> Sr <sub>1.96</sub> Co <sub>2</sub> O <sub>7.7</sub> | 600 | 2.12 |
| Ag <sub>8</sub> SnSe <sub>6</sub> | 650 | 0.43 |  | Bi <sub>2.15</sub> Sr <sub>1.96</sub> Co <sub>2</sub> O <sub>7.7</sub> | 650 | 2.11 |
| Tl <sub>4</sub> SnTe <sub>3</sub> | 323 | 0.52 |  | Bi <sub>2.15</sub> Sr <sub>1.96</sub> Co <sub>2</sub> O <sub>7.7</sub> | 700 | 2.12 |
| Tl <sub>4</sub> SnTe <sub>3</sub> | 373 | 0.46 |  | Bi <sub>2.15</sub> Sr <sub>1.96</sub> Co <sub>2</sub> O <sub>7.7</sub> | 750 | 2.13 |
| Tl <sub>4</sub> SnTe <sub>3</sub> | 423 | 0.45 |  | Bi <sub>2.15</sub> Sr <sub>1.96</sub> Co <sub>2</sub> O <sub>7.7</sub> | 800 | 2.15 |
| Tl <sub>4</sub> SnTe <sub>3</sub> | 473 | 0.45 |  | Bi <sub>2.33</sub> Sr <sub>2.14</sub> Co <sub>2</sub> O <sub>7.7</sub> | 300 | 1.74 |
| Tl <sub>4</sub> SnTe <sub>3</sub> | 523 | 0.47 |  | Bi <sub>2.33</sub> Sr <sub>2.14</sub> Co <sub>2</sub> O <sub>7.7</sub> | 350 | 1.73 |
| Tl <sub>4</sub> SnTe <sub>3</sub> | 623 | 0.49 |  | Bi <sub>2.33</sub> Sr <sub>2.14</sub> Co <sub>2</sub> O <sub>7.7</sub> | 400 | 1.74 |
| Tl <sub>4</sub> SnTe <sub>3</sub> | 673 | 0.5  |  | Bi <sub>2.33</sub> Sr <sub>2.14</sub> Co <sub>2</sub> O <sub>7.7</sub> | 450 | 1.78 |
| Cu <sub>2</sub> SnSe <sub>3</sub> | 323 | 2.83 |  | Bi <sub>2.33</sub> Sr <sub>2.14</sub> Co <sub>2</sub> O <sub>7.7</sub> | 500 | 1.79 |
| Cu <sub>2</sub> SnSe <sub>3</sub> | 423 | 2.05 |  | Bi <sub>2.33</sub> Sr <sub>2.14</sub> Co <sub>2</sub> O <sub>7.7</sub> | 550 | 1.81 |
| Cu <sub>2</sub> SnSe <sub>3</sub> | 523 | 1.61 |  | Bi <sub>2.33</sub> Sr <sub>2.14</sub> Co <sub>2</sub> O <sub>7.7</sub> | 600 | 1.84 |
| Cu <sub>2</sub> SnSe <sub>3</sub> | 623 | 1.31 |  | Bi <sub>2.33</sub> Sr <sub>2.14</sub> Co <sub>2</sub> O <sub>7.7</sub> | 650 | 1.87 |
| Cu <sub>2</sub> SnSe <sub>3</sub> | 723 | 1.14 |  | Bi <sub>2.33</sub> Sr <sub>2.14</sub> Co <sub>2</sub> O <sub>7.7</sub> | 700 | 1.89 |
| Cu <sub>2</sub> SnSe <sub>3</sub> | 823 | 0.9  |  | Bi <sub>2.33</sub> Sr <sub>2.14</sub> Co <sub>2</sub> O <sub>7.7</sub> | 750 | 1.92 |
| Sn <sub>1.05</sub> Se             | 325 | 1.14 |  | Bi <sub>2.33</sub> Sr <sub>2.14</sub> Co <sub>2</sub> O <sub>7.7</sub> | 800 | 1.95 |
| Sn <sub>1.05</sub> Se             | 335 | 1.09 |  | Y <sub>0.148</sub> Zr <sub>0.852</sub> O <sub>1.926</sub>              | 300 | 3.01 |
| Sn <sub>1.05</sub> Se             | 345 | 1.07 |  | Y <sub>0.148</sub> Zr <sub>0.852</sub> O <sub>1.926</sub>              | 350 | 2.92 |
| Sn <sub>1.05</sub> Se             | 355 | 1.03 |  | Y <sub>0.148</sub> Zr <sub>0.852</sub> O <sub>1.926</sub>              | 400 | 2.81 |
| Sn <sub>1.05</sub> Se             | 365 | 1    |  | Y <sub>0.148</sub> Zr <sub>0.852</sub> O <sub>1.926</sub>              | 450 | 2.77 |
| Sn <sub>1.05</sub> Se             | 400 | 0.88 |  | Y <sub>0.148</sub> Zr <sub>0.852</sub> O <sub>1.926</sub>              | 500 | 2.72 |
| Sn <sub>1.05</sub> Se             | 430 | 0.83 |  | Y <sub>0.148</sub> Zr <sub>0.852</sub> O <sub>1.926</sub>              | 550 | 2.67 |
| Sn <sub>1.05</sub> Se             | 460 | 0.77 |  | Y <sub>0.148</sub> Zr <sub>0.852</sub> O <sub>1.926</sub>              | 600 | 2.62 |
| Sn <sub>1.05</sub> Se             | 500 | 0.73 |  | Y <sub>0.148</sub> Zr <sub>0.852</sub> O <sub>1.926</sub>              | 650 | 2.6  |

|          |     |      |  |                      |     |      |
|----------|-----|------|--|----------------------|-----|------|
| Sn1.05Se | 550 | 0.65 |  | Y0.148Zr0.852O1.926  | 700 | 2.55 |
| Sn1.05Se | 600 | 0.6  |  | Sn0.91Mn0.08Bi0.01Te | 323 | 4.31 |
| Sn1.05Se | 650 | 0.56 |  | Sn0.91Mn0.08Bi0.01Te | 373 | 4.23 |
| Sn1.05Se | 700 | 0.54 |  | Sn0.91Mn0.08Bi0.01Te | 423 | 4.1  |
| Sn0.95Se | 325 | 1.16 |  | Sn0.91Mn0.08Bi0.01Te | 473 | 3.97 |
| Sn0.95Se | 335 | 1.12 |  | Sn0.91Mn0.08Bi0.01Te | 523 | 3.78 |
| Sn0.95Se | 345 | 1.09 |  | Sn0.91Mn0.08Bi0.01Te | 773 | 2.48 |
| Sn0.95Se | 355 | 1.05 |  | Sn0.92Ge0.04As0.04Te | 328 | 7.48 |
| Sn0.95Se | 365 | 1.02 |  | Sn0.92Ge0.04As0.04Te | 470 | 6.63 |
| Sn0.95Se | 400 | 0.91 |  | Sn0.92Ge0.04As0.04Te | 620 | 5.23 |
| Sn0.95Se | 430 | 0.85 |  | Sn0.92Ge0.04As0.04Te | 769 | 3.86 |
| Sn0.95Se | 460 | 0.8  |  | Sn0.92Ge0.04As0.04Te | 869 | 3.53 |
| Sn0.95Se | 500 | 0.74 |  | Ba7.97Ga15.95Sn30.05 | 300 | 0.99 |
| Sn0.95Se | 550 | 0.67 |  | Ba7.97Ga15.95Sn30.06 | 340 | 0.92 |
| Sn0.95Se | 600 | 0.61 |  | Ba7.97Ga15.95Sn30.07 | 580 | 1.23 |
| Sn0.95Se | 650 | 0.57 |  | Ba7.97Ga15.95Sn30.08 | 540 | 1.02 |
| Sn0.95Se | 700 | 0.52 |  | Ba7.97Ga15.95Sn30.09 | 500 | 0.9  |
| Gd2Zr2O7 | 300 | 1.97 |  | Ba7.97Ga15.95Sn30.10 | 460 | 0.87 |
| Gd2Zr2O7 | 350 | 1.92 |  | ZrNiPb0.9Sn0.8Bi0.02 | 303 | 6.44 |
| Gd2Zr2O7 | 400 | 1.88 |  | ZrNiPb0.9Sn0.8Bi0.02 | 475 | 5.87 |
| Gd2Zr2O7 | 450 | 1.87 |  | ZrNiPb0.9Sn0.8Bi0.02 | 673 | 5.66 |
| Gd2Zr2O7 | 500 | 1.83 |  | ZrNiPb0.9Sn0.8Bi0.02 | 771 | 5.63 |
| Gd2Zr2O7 | 550 | 1.8  |  | ZrNiPb0.9Sn0.8Bi0.02 | 871 | 5.9  |
| Gd2Zr2O7 | 600 | 1.78 |  | Cu2ZnSn0.95Ag0.05Se4 | 323 | 4.21 |
| Gd2Zr2O7 | 650 | 1.76 |  | Cu2ZnSn0.95Ag0.05Se4 | 373 | 3.53 |
| Gd2Zr2O7 | 700 | 1.73 |  | Cu2ZnSn0.95Ag0.05Se4 | 473 | 3.12 |
| Zr3Y4O12 | 373 | 2.25 |  | Cu2ZnSn0.95Ag0.05Se4 | 573 | 2.56 |
| Zr3Y4O12 | 473 | 2.12 |  | Cu2ZnSn0.95Ag0.05Se4 | 673 | 2.13 |
| Zr3Y4O12 | 573 | 2.02 |  | Cu2ZnSn0.98Ag0.02Se4 | 323 | 4.36 |
| Zr3Y4O12 | 673 | 1.93 |  | Cu2ZnSn0.98Ag0.02Se4 | 373 | 3.84 |
| Zr3Y4O12 | 773 | 1.89 |  | Cu2ZnSn0.98Ag0.02Se4 | 473 | 3.64 |
| Yb2Sn2O7 | 300 | 2.98 |  | Cu2ZnSn0.98Ag0.02Se4 | 573 | 3.18 |

|                                                |     |      |  |                                                                         |      |      |
|------------------------------------------------|-----|------|--|-------------------------------------------------------------------------|------|------|
| Yb <sub>2</sub> Sn <sub>2</sub> O <sub>7</sub> | 350 | 2.88 |  | Cu <sub>2</sub> ZnSn <sub>0.98</sub> Ag <sub>0.02</sub> Se <sub>4</sub> | 673  | 2.91 |
| Yb <sub>2</sub> Sn <sub>2</sub> O <sub>7</sub> | 400 | 2.78 |  | Li <sub>1.01</sub> Co <sub>0.85</sub> Ni <sub>0.15</sub> O <sub>2</sub> | 323  | 0.32 |
| Yb <sub>2</sub> Sn <sub>2</sub> O <sub>7</sub> | 450 | 2.67 |  | Li <sub>1.01</sub> Co <sub>0.85</sub> Ni <sub>0.15</sub> O <sub>2</sub> | 423  | 0.98 |
| Yb <sub>2</sub> Sn <sub>2</sub> O <sub>7</sub> | 500 | 2.59 |  | Li <sub>1.01</sub> Co <sub>0.85</sub> Ni <sub>0.15</sub> O <sub>2</sub> | 523  | 1.29 |
| Yb <sub>2</sub> Sn <sub>2</sub> O <sub>7</sub> | 550 | 2.5  |  | Li <sub>1.01</sub> Co <sub>0.85</sub> Ni <sub>0.15</sub> O <sub>2</sub> | 623  | 1.17 |
| Yb <sub>2</sub> Sn <sub>2</sub> O <sub>7</sub> | 600 | 2.42 |  | Li <sub>1.01</sub> Co <sub>0.85</sub> Ni <sub>0.15</sub> O <sub>2</sub> | 723  | 1    |
| La <sub>2</sub> Ce <sub>2</sub> O <sub>7</sub> | 300 | 2.91 |  | Li <sub>1.01</sub> Co <sub>0.85</sub> Ni <sub>0.15</sub> O <sub>2</sub> | 823  | 0.92 |
| La <sub>2</sub> Ce <sub>2</sub> O <sub>7</sub> | 473 | 2.25 |  | Li <sub>1.01</sub> Co <sub>0.85</sub> Ni <sub>0.15</sub> O <sub>2</sub> | 923  | 0.96 |
| La <sub>2</sub> Ce <sub>2</sub> O <sub>7</sub> | 673 | 1.91 |  | Li <sub>1.01</sub> Co <sub>0.85</sub> Ni <sub>0.15</sub> O <sub>2</sub> | 1023 | 0.86 |
| La <sub>2</sub> Ce <sub>2</sub> O <sub>7</sub> | 873 | 1.73 |  | Li <sub>1.04</sub> Co <sub>0.85</sub> Ni <sub>0.15</sub> O <sub>2</sub> | 323  | 1.92 |
| La <sub>2</sub> Zr <sub>2</sub> O <sub>7</sub> | 560 | 3.38 |  | Li <sub>1.04</sub> Co <sub>0.85</sub> Ni <sub>0.15</sub> O <sub>2</sub> | 423  | 2.01 |
| La <sub>2</sub> Zr <sub>2</sub> O <sub>7</sub> | 590 | 3.21 |  | Li <sub>1.04</sub> Co <sub>0.85</sub> Ni <sub>0.15</sub> O <sub>2</sub> | 523  | 1.91 |
| La <sub>2</sub> Zr <sub>2</sub> O <sub>7</sub> | 630 | 2.93 |  | Li <sub>1.04</sub> Co <sub>0.85</sub> Ni <sub>0.15</sub> O <sub>2</sub> | 623  | 1.69 |
| La <sub>2</sub> Zr <sub>2</sub> O <sub>7</sub> | 660 | 2.86 |  | Li <sub>1.04</sub> Co <sub>0.85</sub> Ni <sub>0.15</sub> O <sub>2</sub> | 723  | 1.42 |
| La <sub>2</sub> Zr <sub>2</sub> O <sub>7</sub> | 680 | 2.7  |  | Li <sub>1.04</sub> Co <sub>0.85</sub> Ni <sub>0.15</sub> O <sub>2</sub> | 823  | 1.33 |
| La <sub>2</sub> Zr <sub>2</sub> O <sub>7</sub> | 740 | 2.58 |  | Li <sub>1.04</sub> Co <sub>0.85</sub> Ni <sub>0.15</sub> O <sub>2</sub> | 923  | 1.19 |
| Sm <sub>2</sub> Zr <sub>2</sub> O <sub>7</sub> | 300 | 1.95 |  | Li <sub>1.04</sub> Co <sub>0.85</sub> Ni <sub>0.15</sub> O <sub>2</sub> | 1023 | 0.87 |
| Sm <sub>2</sub> Zr <sub>2</sub> O <sub>7</sub> | 473 | 1.82 |  | Cu <sub>2.2</sub> Sn <sub>0.8</sub> Sb <sub>0.2</sub> Se <sub>3.2</sub> | 300  | 3.49 |
| Sm <sub>2</sub> Zr <sub>2</sub> O <sub>7</sub> | 673 | 1.75 |  | Cu <sub>2.2</sub> Sn <sub>0.8</sub> Sb <sub>0.2</sub> Se <sub>3.2</sub> | 372  | 3.27 |
| Sm <sub>2</sub> Zr <sub>2</sub> O <sub>7</sub> | 873 | 1.69 |  | Cu <sub>2.2</sub> Sn <sub>0.8</sub> Sb <sub>0.2</sub> Se <sub>3.2</sub> | 473  | 2.97 |
| La <sub>2</sub> Zr <sub>2</sub> O <sub>7</sub> | 370 | 3.3  |  | Cu <sub>2.2</sub> Sn <sub>0.8</sub> Sb <sub>0.2</sub> Se <sub>3.2</sub> | 523  | 2.8  |
| La <sub>2</sub> Zr <sub>2</sub> O <sub>7</sub> | 470 | 3.25 |  | Cu <sub>2.2</sub> Sn <sub>0.8</sub> Sb <sub>0.2</sub> Se <sub>3.2</sub> | 622  | 2.57 |
| WNb <sub>12</sub> O <sub>33</sub>              | 373 | 2.02 |  | Cu <sub>2.2</sub> Sn <sub>0.8</sub> Sb <sub>0.2</sub> Se <sub>3.2</sub> | 723  | 2.2  |
| WNb <sub>12</sub> O <sub>33</sub>              | 473 | 1.98 |  | Cu <sub>2.5</sub> Sn <sub>0.5</sub> Sb <sub>0.5</sub> Se <sub>3.5</sub> | 300  | 5.31 |
| WNb <sub>12</sub> O <sub>33</sub>              | 573 | 1.94 |  | Cu <sub>2.5</sub> Sn <sub>0.5</sub> Sb <sub>0.5</sub> Se <sub>3.5</sub> | 372  | 5.03 |
| WNb <sub>12</sub> O <sub>33</sub>              | 673 | 1.92 |  | Cu <sub>2.5</sub> Sn <sub>0.5</sub> Sb <sub>0.5</sub> Se <sub>3.5</sub> | 473  | 4.64 |
| Ca <sub>3</sub> Co <sub>4</sub> O <sub>9</sub> | 325 | 2.31 |  | Cu <sub>2.5</sub> Sn <sub>0.5</sub> Sb <sub>0.5</sub> Se <sub>3.5</sub> | 523  | 4.48 |
| Ca <sub>3</sub> Co <sub>4</sub> O <sub>9</sub> | 375 | 2.17 |  | Cu <sub>2.5</sub> Sn <sub>0.5</sub> Sb <sub>0.5</sub> Se <sub>3.5</sub> | 622  | 4.06 |
| Ca <sub>3</sub> Co <sub>4</sub> O <sub>9</sub> | 425 | 2.14 |  | Cu <sub>2.5</sub> Sn <sub>0.5</sub> Sb <sub>0.5</sub> Se <sub>3.5</sub> | 723  | 3.49 |
| Ca <sub>3</sub> Co <sub>4</sub> O <sub>9</sub> | 475 | 2.09 |  | Cu <sub>2.8</sub> Sn <sub>0.2</sub> Sb <sub>0.8</sub> Se <sub>3.8</sub> | 300  | 5.74 |
| Ca <sub>3</sub> Co <sub>4</sub> O <sub>9</sub> | 525 | 2.02 |  | Cu <sub>2.8</sub> Sn <sub>0.2</sub> Sb <sub>0.8</sub> Se <sub>3.8</sub> | 372  | 5.24 |
| Ca <sub>3</sub> Co <sub>4</sub> O <sub>9</sub> | 575 | 1.97 |  | Cu <sub>2.8</sub> Sn <sub>0.2</sub> Sb <sub>0.8</sub> Se <sub>3.8</sub> | 473  | 4.55 |

|                                                 |      |      |  |                                                                         |     |      |
|-------------------------------------------------|------|------|--|-------------------------------------------------------------------------|-----|------|
| Ca <sub>3</sub> Co <sub>4</sub> O <sub>9</sub>  | 625  | 1.96 |  | Cu <sub>2.8</sub> Sn <sub>0.2</sub> Sb <sub>0.8</sub> Se <sub>3.8</sub> | 523 | 4.25 |
| Ca <sub>3</sub> Co <sub>4</sub> O <sub>9</sub>  | 675  | 1.92 |  | Cu <sub>2.8</sub> Sn <sub>0.2</sub> Sb <sub>0.8</sub> Se <sub>3.8</sub> | 622 | 3.74 |
| Ca <sub>3</sub> Co <sub>4</sub> O <sub>9</sub>  | 725  | 1.9  |  | Cu <sub>2.8</sub> Sn <sub>0.2</sub> Sb <sub>0.8</sub> Se <sub>3.8</sub> | 723 | 3.03 |
| Ba <sub>2</sub> CoRuO <sub>6</sub>              | 318  | 1.48 |  | Bi <sub>0.8</sub> Pb <sub>0.1</sub> Yb <sub>0.1</sub> CuSeO             | 347 | 0.78 |
| Ba <sub>2</sub> CoRuO <sub>6</sub>              | 418  | 1.46 |  | Bi <sub>0.8</sub> Pb <sub>0.1</sub> Yb <sub>0.1</sub> CuSeO             | 446 | 0.7  |
| Ba <sub>2</sub> CoRuO <sub>6</sub>              | 518  | 1.46 |  | Bi <sub>0.8</sub> Pb <sub>0.1</sub> Yb <sub>0.1</sub> CuSeO             | 543 | 0.63 |
| BaGd <sub>2</sub> NiO <sub>5</sub>              | 426  | 2.38 |  | Bi <sub>0.8</sub> Pb <sub>0.1</sub> Yb <sub>0.1</sub> CuSeO             | 640 | 0.56 |
| BaGd <sub>2</sub> NiO <sub>5</sub>              | 532  | 2.03 |  | Bi <sub>0.8</sub> Pb <sub>0.1</sub> Yb <sub>0.1</sub> CuSeO             | 744 | 0.51 |
| BaGd <sub>2</sub> NiO <sub>5</sub>              | 638  | 1.8  |  | Bi <sub>0.8</sub> Pb <sub>0.1</sub> Yb <sub>0.1</sub> CuSeO             | 847 | 0.48 |
| BaGd <sub>2</sub> NiO <sub>5</sub>              | 750  | 1.66 |  | Sn <sub>0.93</sub> Pb <sub>0.06</sub> Zn <sub>0.01</sub> Se             | 300 | 0.85 |
| BaGd <sub>2</sub> NiO <sub>5</sub>              | 862  | 1.56 |  | Sn <sub>0.93</sub> Pb <sub>0.06</sub> Zn <sub>0.01</sub> Se             | 373 | 0.71 |
| BaGd <sub>2</sub> NiO <sub>5</sub>              | 975  | 1.5  |  | Sn <sub>0.93</sub> Pb <sub>0.06</sub> Zn <sub>0.01</sub> Se             | 473 | 0.59 |
| BaGd <sub>2</sub> NiO <sub>5</sub>              | 1074 | 1.44 |  | Sn <sub>0.93</sub> Pb <sub>0.06</sub> Zn <sub>0.01</sub> Se             | 573 | 0.52 |
| BaGd <sub>2</sub> NiO <sub>5</sub>              | 1179 | 1.42 |  | Sn <sub>0.93</sub> Pb <sub>0.06</sub> Zn <sub>0.01</sub> Se             | 673 | 0.43 |
| BaGd <sub>2</sub> NiO <sub>5</sub>              | 1272 | 1.38 |  | Sn <sub>0.93</sub> Pb <sub>0.06</sub> Zn <sub>0.01</sub> Se             | 773 | 0.34 |
| SnAgSbSe <sub>2</sub>                           | 600  | 5.15 |  | Sn <sub>0.96</sub> Pb <sub>0.03</sub> Zn <sub>0.01</sub> Se             | 300 | 1.12 |
| SnAgSbSe <sub>2</sub>                           | 650  | 4.66 |  | Sn <sub>0.96</sub> Pb <sub>0.03</sub> Zn <sub>0.01</sub> Se             | 373 | 0.85 |
| SnAgSbSe <sub>2</sub>                           | 700  | 4.18 |  | Sn <sub>0.96</sub> Pb <sub>0.03</sub> Zn <sub>0.01</sub> Se             | 473 | 0.66 |
| SnAgSbSe <sub>2</sub>                           | 750  | 3.77 |  | Sn <sub>0.96</sub> Pb <sub>0.03</sub> Zn <sub>0.01</sub> Se             | 573 | 0.56 |
| SnAgSbSe <sub>2</sub>                           | 800  | 3.37 |  | Sn <sub>0.96</sub> Pb <sub>0.03</sub> Zn <sub>0.01</sub> Se             | 673 | 0.47 |
| Cu <sub>5</sub> Sn <sub>2</sub> Se <sub>7</sub> | 300  | 5.28 |  | Sn <sub>0.96</sub> Pb <sub>0.03</sub> Zn <sub>0.01</sub> Se             | 773 | 0.36 |
| Cu <sub>5</sub> Sn <sub>2</sub> Se <sub>7</sub> | 400  | 4.77 |  | Sn <sub>0.97</sub> Pb <sub>0.02</sub> Zn <sub>0.01</sub> Se             | 300 | 1.28 |
| Cu <sub>5</sub> Sn <sub>2</sub> Se <sub>7</sub> | 500  | 4.3  |  | Sn <sub>0.97</sub> Pb <sub>0.02</sub> Zn <sub>0.01</sub> Se             | 373 | 1.07 |
| Cu <sub>5</sub> Sn <sub>2</sub> Se <sub>7</sub> | 598  | 3.86 |  | Sn <sub>0.97</sub> Pb <sub>0.02</sub> Zn <sub>0.01</sub> Se             | 473 | 0.95 |
| Cu <sub>5</sub> Sn <sub>2</sub> Se <sub>7</sub> | 698  | 3.31 |  | Sn <sub>0.97</sub> Pb <sub>0.02</sub> Zn <sub>0.01</sub> Se             | 573 | 0.85 |
| BaDyCo <sub>4</sub> O <sub>7</sub>              | 368  | 0.61 |  | Sn <sub>0.97</sub> Pb <sub>0.02</sub> Zn <sub>0.01</sub> Se             | 673 | 0.7  |
| BaErCo <sub>4</sub> O <sub>7</sub>              | 368  | 0.62 |  | Sn <sub>0.97</sub> Pb <sub>0.02</sub> Zn <sub>0.01</sub> Se             | 773 | 0.57 |
| BaHoCo <sub>4</sub> O <sub>7</sub>              | 368  | 0.58 |  | Sn <sub>0.98</sub> Pb <sub>0.01</sub> Zn <sub>0.01</sub> Se             | 300 | 1.23 |
| BaLuCo <sub>4</sub> O <sub>7</sub>              | 368  | 0.59 |  | Sn <sub>0.98</sub> Pb <sub>0.01</sub> Zn <sub>0.01</sub> Se             | 373 | 1.08 |
| BaTmCo <sub>4</sub> O <sub>7</sub>              | 368  | 0.56 |  | Sn <sub>0.98</sub> Pb <sub>0.01</sub> Zn <sub>0.01</sub> Se             | 473 | 0.91 |
| SrFe <sub>4</sub> Sb <sub>12</sub>              | 310  | 3.19 |  | Sn <sub>0.98</sub> Pb <sub>0.01</sub> Zn <sub>0.01</sub> Se             | 573 | 0.77 |
| SrFe <sub>4</sub> Sb <sub>12</sub>              | 340  | 3.25 |  | Sn <sub>0.98</sub> Pb <sub>0.01</sub> Zn <sub>0.01</sub> Se             | 673 | 0.67 |

|           |     |      |  |                       |      |      |
|-----------|-----|------|--|-----------------------|------|------|
| SrFe4Sb12 | 370 | 3.3  |  | Sn0.98Pb0.01Zn0.01Se  | 773  | 0.55 |
| SrFe4Sb12 | 390 | 3.34 |  | (Sm0.75La0.25)2Zr2O7  | 300  | 1.9  |
| SrFe4Sb12 | 420 | 3.39 |  | (Sm0.75La0.25)2Zr2O7  | 473  | 1.48 |
| SrFe4Sb12 | 440 | 3.45 |  | (Sm0.75La0.25)2Zr2O7  | 673  | 1.31 |
| SrFe4Sb12 | 470 | 3.5  |  | (Sm0.75La0.25)2Zr2O7  | 873  | 1.24 |
| SrFe4Sb12 | 490 | 3.53 |  | (Sm0.25La0.75)2Zr2O7  | 300  | 2.4  |
| SrFe4Sb12 | 520 | 3.58 |  | (Sm0.25La0.75)2Zr2O7  | 473  | 2.16 |
| SrFe4Sb12 | 540 | 3.61 |  | (Sm0.25La0.75)2Zr2O7  | 673  | 2.04 |
| SrFe4Sb12 | 570 | 3.65 |  | (Sm0.25La0.75)2Zr2O7  | 873  | 1.96 |
| SrFe4Sb12 | 590 | 3.68 |  | (Bi0.05Ca0.95)3Co4O9  | 290  | 2.32 |
| SrFe4Sb12 | 620 | 3.72 |  | (Bi0.05Ca0.95)3Co4O9  | 373  | 2.03 |
| SrFe4Sb12 | 640 | 3.79 |  | (Bi0.05Ca0.95)3Co4O9  | 573  | 1.89 |
| SrFe4Sb12 | 670 | 3.83 |  | Zn0.9Cd0.1Sc0.02O1.03 | 300  | 7.83 |
| SrFe4Sb12 | 740 | 4.05 |  | Zn0.9Cd0.1Sc0.02O1.03 | 373  | 6.5  |
| SrFe4Sb12 | 800 | 4.27 |  | Zn0.9Cd0.1Sc0.02O1.03 | 473  | 5.5  |
| Ba2ErAlO5 | 400 | 1.47 |  | Zn0.9Cd0.1Sc0.02O1.03 | 573  | 5    |
| Ba2ErAlO5 | 450 | 1.42 |  | Zn0.9Cd0.1Sc0.02O1.03 | 673  | 4.34 |
| Ba2ErAlO5 | 500 | 1.38 |  | Zn0.9Cd0.1Sc0.02O1.03 | 773  | 3.83 |
| Ba2ErAlO5 | 550 | 1.35 |  | Zn0.9Cd0.1Sc0.02O1.03 | 873  | 3.58 |
| Ba2ErAlO5 | 600 | 1.3  |  | Zn0.9Cd0.1Sc0.02O1.03 | 973  | 3.26 |
| Pr2CoFeO6 | 380 | 1.03 |  | Zn0.9Cd0.1Sc0.02O1.03 | 1073 | 3.1  |
| Pr2CoFeO6 | 480 | 0.91 |  | Zn0.9Cd0.1Sc0.02O1.03 | 1173 | 2.83 |
| Pr2CoFeO6 | 580 | 0.82 |  | Zn0.9Cd0.1Sc0.04O1.06 | 300  | 8    |
| Pr2CoFeO6 | 680 | 0.71 |  | Zn0.9Cd0.1Sc0.04O1.06 | 373  | 6.8  |
| W4Nb26O77 | 373 | 2.08 |  | Zn0.9Cd0.1Sc0.04O1.06 | 473  | 5.7  |
| W4Nb26O77 | 473 | 2.05 |  | Zn0.9Cd0.1Sc0.04O1.06 | 573  | 4.95 |
| W4Nb26O77 | 573 | 2.03 |  | Zn0.9Cd0.1Sc0.04O1.06 | 673  | 4.38 |
| W4Nb26O77 | 673 | 2    |  | Zn0.9Cd0.1Sc0.04O1.06 | 773  | 3.95 |
| W3Nb14O44 | 373 | 1.84 |  | Zn0.9Cd0.1Sc0.04O1.06 | 873  | 3.56 |
| W3Nb14O44 | 473 | 1.85 |  | Zn0.9Cd0.1Sc0.04O1.06 | 973  | 3.25 |
| W3Nb14O44 | 573 | 1.84 |  | Zn0.9Cd0.1Sc0.04O1.06 | 1073 | 2.95 |
| W3Nb14O44 | 673 | 1.83 |  | Zn0.9Cd0.1Sc0.04O1.06 | 1173 | 2.7  |

|                                     |      |      |  |                                                              |     |      |
|-------------------------------------|------|------|--|--------------------------------------------------------------|-----|------|
| Pr <sub>2</sub> FeCrO <sub>6</sub>  | 300  | 1.29 |  | Sn <sub>0.96</sub> Pb <sub>0.01</sub> Cd <sub>0.035</sub> Se | 300 | 0.88 |
| Pr <sub>2</sub> FeCrO <sub>6</sub>  | 380  | 1.2  |  | Sn <sub>0.96</sub> Pb <sub>0.01</sub> Cd <sub>0.035</sub> Se | 373 | 0.67 |
| Pr <sub>2</sub> FeCrO <sub>6</sub>  | 460  | 1.09 |  | Sn <sub>0.96</sub> Pb <sub>0.01</sub> Cd <sub>0.035</sub> Se | 423 | 0.57 |
| Pr <sub>2</sub> FeCrO <sub>6</sub>  | 520  | 1.03 |  | Sn <sub>0.96</sub> Pb <sub>0.01</sub> Cd <sub>0.035</sub> Se | 473 | 0.51 |
| Pr <sub>2</sub> FeCrO <sub>6</sub>  | 580  | 1.02 |  | Sn <sub>0.96</sub> Pb <sub>0.01</sub> Cd <sub>0.035</sub> Se | 573 | 0.41 |
| Pr <sub>2</sub> FeCrO <sub>6</sub>  | 640  | 1    |  | Sn <sub>0.96</sub> Pb <sub>0.01</sub> Cd <sub>0.035</sub> Se | 673 | 0.34 |
| Pr <sub>2</sub> FeCrO <sub>6</sub>  | 700  | 0.98 |  | Sn <sub>0.96</sub> Pb <sub>0.01</sub> Cd <sub>0.035</sub> Se | 723 | 0.34 |
| Cu <sub>2</sub> CdSnSe <sub>4</sub> | 300  | 2.78 |  | Sn <sub>0.96</sub> Pb <sub>0.01</sub> Cd <sub>0.035</sub> Se | 823 | 0.36 |
| Cu <sub>2</sub> CdSnSe <sub>4</sub> | 350  | 2.35 |  | Sn <sub>0.96</sub> Pb <sub>0.01</sub> Cd <sub>0.035</sub> Se | 873 | 0.34 |
| Cu <sub>2</sub> CdSnSe <sub>4</sub> | 400  | 2.02 |  | Sn <sub>0.97</sub> Pb <sub>0.01</sub> Cd <sub>0.025</sub> Se | 300 | 1.13 |
| Cu <sub>2</sub> CdSnSe <sub>4</sub> | 450  | 1.74 |  | Sn <sub>0.97</sub> Pb <sub>0.01</sub> Cd <sub>0.025</sub> Se | 373 | 0.88 |
| Cu <sub>2</sub> CdSnSe <sub>4</sub> | 500  | 1.52 |  | Sn <sub>0.97</sub> Pb <sub>0.01</sub> Cd <sub>0.025</sub> Se | 423 | 0.79 |
| Cu <sub>2</sub> CdSnSe <sub>4</sub> | 550  | 1.37 |  | Sn <sub>0.97</sub> Pb <sub>0.01</sub> Cd <sub>0.025</sub> Se | 473 | 0.7  |
| Cu <sub>2</sub> CdSnSe <sub>4</sub> | 600  | 1.25 |  | Sn <sub>0.97</sub> Pb <sub>0.01</sub> Cd <sub>0.025</sub> Se | 573 | 0.56 |
| Cu <sub>2</sub> CdSnSe <sub>4</sub> | 650  | 1.12 |  | Sn <sub>0.97</sub> Pb <sub>0.01</sub> Cd <sub>0.025</sub> Se | 673 | 0.48 |
| Cu <sub>2</sub> CdSnSe <sub>4</sub> | 700  | 1.01 |  | Sn <sub>0.97</sub> Pb <sub>0.01</sub> Cd <sub>0.025</sub> Se | 723 | 0.48 |
| Cu <sub>2</sub> ZnSnSe <sub>4</sub> | 323  | 4.57 |  | Sn <sub>0.97</sub> Pb <sub>0.01</sub> Cd <sub>0.025</sub> Se | 823 | 0.5  |
| Cu <sub>2</sub> ZnSnSe <sub>4</sub> | 373  | 3.99 |  | Sn <sub>0.97</sub> Pb <sub>0.01</sub> Cd <sub>0.025</sub> Se | 873 | 0.48 |
| Cu <sub>2</sub> ZnSnSe <sub>4</sub> | 473  | 3.76 |  | ZrNiPb <sub>0.92</sub> Sn <sub>0.6</sub> Bi <sub>0.02</sub>  | 303 | 5.9  |
| Cu <sub>2</sub> ZnSnSe <sub>4</sub> | 573  | 3.3  |  | ZrNiPb <sub>0.92</sub> Sn <sub>0.6</sub> Bi <sub>0.02</sub>  | 475 | 5.84 |
| Cu <sub>2</sub> ZnSnSe <sub>4</sub> | 673  | 3.02 |  | ZrNiPb <sub>0.92</sub> Sn <sub>0.6</sub> Bi <sub>0.02</sub>  | 673 | 5.85 |
| Sr <sub>14</sub> MgBi <sub>11</sub> | 326  | 1.25 |  | ZrNiPb <sub>0.92</sub> Sn <sub>0.6</sub> Bi <sub>0.02</sub>  | 771 | 5.9  |
| Sr <sub>14</sub> MgBi <sub>11</sub> | 424  | 1.27 |  | ZrNiPb <sub>0.92</sub> Sn <sub>0.6</sub> Bi <sub>0.02</sub>  | 871 | 5.97 |
| Sr <sub>14</sub> MgBi <sub>11</sub> | 521  | 1.33 |  | ZrNiPb <sub>0.94</sub> Sn <sub>0.4</sub> Bi <sub>0.02</sub>  | 303 | 5.92 |
| Sr <sub>14</sub> MgBi <sub>11</sub> | 621  | 1.34 |  | ZrNiPb <sub>0.94</sub> Sn <sub>0.4</sub> Bi <sub>0.02</sub>  | 475 | 5.58 |
| Sr <sub>14</sub> MgBi <sub>11</sub> | 717  | 1.34 |  | ZrNiPb <sub>0.94</sub> Sn <sub>0.4</sub> Bi <sub>0.02</sub>  | 673 | 5.31 |
| Sr <sub>14</sub> MgBi <sub>11</sub> | 817  | 1.33 |  | ZrNiPb <sub>0.94</sub> Sn <sub>0.4</sub> Bi <sub>0.02</sub>  | 771 | 5.33 |
| Sr <sub>14</sub> MgBi <sub>11</sub> | 914  | 1.35 |  | ZrNiPb <sub>0.94</sub> Sn <sub>0.4</sub> Bi <sub>0.02</sub>  | 871 | 5.51 |
| Sr <sub>14</sub> MgBi <sub>11</sub> | 1013 | 1.4  |  | ZrNiPb <sub>0.96</sub> Sn <sub>0.2</sub> Bi <sub>0.02</sub>  | 303 | 6.6  |
| Cu <sub>5</sub> SnSbSe <sub>7</sub> | 300  | 5.27 |  | ZrNiPb <sub>0.96</sub> Sn <sub>0.2</sub> Bi <sub>0.02</sub>  | 475 | 6.34 |
| Cu <sub>5</sub> SnSbSe <sub>7</sub> | 373  | 5.03 |  | ZrNiPb <sub>0.96</sub> Sn <sub>0.2</sub> Bi <sub>0.02</sub>  | 673 | 5.95 |
| Cu <sub>5</sub> SnSbSe <sub>7</sub> | 473  | 4.63 |  | ZrNiPb <sub>0.96</sub> Sn <sub>0.2</sub> Bi <sub>0.02</sub>  | 771 | 6.05 |

|                                                  |     |      |                                                                           |     |      |
|--------------------------------------------------|-----|------|---------------------------------------------------------------------------|-----|------|
| Cu <sub>5</sub> SnSbSe <sub>7</sub>              | 573 | 4.28 | ZrNiPb <sub>0.96</sub> Sn <sub>0.2</sub> Bi <sub>0.02</sub>               | 871 | 6.26 |
| Cu <sub>5</sub> SnSbSe <sub>7</sub>              | 673 | 3.8  | Ag <sub>0.01</sub> Sn <sub>0.99</sub> Se <sub>0.85</sub> O <sub>0.2</sub> | 322 | 0.2  |
| Cu <sub>5</sub> SnSbSe <sub>7</sub>              | 723 | 3.47 | Ag <sub>0.01</sub> Sn <sub>0.99</sub> Se <sub>0.85</sub> O <sub>0.2</sub> | 418 | 0.17 |
| La <sub>2</sub> SrAl <sub>2</sub> O <sub>7</sub> | 300 | 6.07 | Ag <sub>0.01</sub> Sn <sub>0.99</sub> Se <sub>0.85</sub> O <sub>0.2</sub> | 518 | 0.16 |
| La <sub>2</sub> SrAl <sub>2</sub> O <sub>7</sub> | 380 | 4.95 | Ag <sub>0.01</sub> Sn <sub>0.99</sub> Se <sub>0.85</sub> O <sub>0.2</sub> | 567 | 0.16 |
| La <sub>2</sub> SrAl <sub>2</sub> O <sub>7</sub> | 480 | 4.52 | Ag <sub>0.01</sub> Sn <sub>0.99</sub> Se <sub>0.85</sub> O <sub>0.2</sub> | 616 | 0.16 |
| La <sub>2</sub> SrAl <sub>2</sub> O <sub>7</sub> | 580 | 4.2  | Ag <sub>0.01</sub> Sn <sub>0.99</sub> Se <sub>0.85</sub> O <sub>0.2</sub> | 666 | 0.18 |
| La <sub>2</sub> SrAl <sub>2</sub> O <sub>7</sub> | 680 | 3.89 | Ag <sub>0.01</sub> Sn <sub>0.99</sub> Se <sub>0.85</sub> O <sub>0.2</sub> | 763 | 0.18 |
| La <sub>2</sub> SrAl <sub>2</sub> O <sub>7</sub> | 780 | 3.68 | Ag <sub>0.01</sub> Sn <sub>0.99</sub> Se <sub>0.85</sub> O <sub>0.2</sub> | 813 | 0.15 |
| La <sub>2</sub> SrAl <sub>2</sub> O <sub>7</sub> | 880 | 3.51 | Ag <sub>0.01</sub> Sn <sub>0.99</sub> Se <sub>0.95</sub> O <sub>0.1</sub> | 322 | 0.33 |
| Nd <sub>2</sub> SrAl <sub>2</sub> O <sub>7</sub> | 300 | 4.08 | Ag <sub>0.01</sub> Sn <sub>0.99</sub> Se <sub>0.95</sub> O <sub>0.1</sub> | 418 | 0.26 |
| Nd <sub>2</sub> SrAl <sub>2</sub> O <sub>7</sub> | 380 | 3.81 | Ag <sub>0.01</sub> Sn <sub>0.99</sub> Se <sub>0.95</sub> O <sub>0.1</sub> | 518 | 0.2  |
| Nd <sub>2</sub> SrAl <sub>2</sub> O <sub>7</sub> | 480 | 3.48 | Ag <sub>0.01</sub> Sn <sub>0.99</sub> Se <sub>0.95</sub> O <sub>0.1</sub> | 567 | 0.19 |
| Nd <sub>2</sub> SrAl <sub>2</sub> O <sub>7</sub> | 580 | 3.16 | Ag <sub>0.01</sub> Sn <sub>0.99</sub> Se <sub>0.95</sub> O <sub>0.1</sub> | 616 | 0.21 |
| Nd <sub>2</sub> SrAl <sub>2</sub> O <sub>7</sub> | 680 | 2.98 | Ag <sub>0.01</sub> Sn <sub>0.99</sub> Se <sub>0.95</sub> O <sub>0.1</sub> | 666 | 0.24 |
| Nd <sub>2</sub> SrAl <sub>2</sub> O <sub>7</sub> | 780 | 2.84 | Ag <sub>0.01</sub> Sn <sub>0.99</sub> Se <sub>0.95</sub> O <sub>0.1</sub> | 763 | 0.22 |
| Nd <sub>2</sub> SrAl <sub>2</sub> O <sub>7</sub> | 880 | 2.76 | Ag <sub>0.01</sub> Sn <sub>0.99</sub> Se <sub>0.95</sub> O <sub>0.1</sub> | 813 | 0.18 |
| Sm <sub>2</sub> SrAl <sub>2</sub> O <sub>7</sub> | 300 | 3.74 | (GeTe) <sub>0.7</sub> (AgSnSe <sub>2</sub> ) <sub>0.3</sub>               | 323 | 1.23 |
| Sm <sub>2</sub> SrAl <sub>2</sub> O <sub>7</sub> | 380 | 3.51 | (GeTe) <sub>0.7</sub> (AgSnSe <sub>2</sub> ) <sub>0.3</sub>               | 423 | 1.38 |
| Sm <sub>2</sub> SrAl <sub>2</sub> O <sub>7</sub> | 480 | 3.38 | (GeTe) <sub>0.7</sub> (AgSnSe <sub>2</sub> ) <sub>0.3</sub>               | 523 | 1.38 |
| Sm <sub>2</sub> SrAl <sub>2</sub> O <sub>7</sub> | 580 | 3.34 | (GeTe) <sub>0.7</sub> (AgSnSe <sub>2</sub> ) <sub>0.3</sub>               | 623 | 1.34 |
| Sm <sub>2</sub> SrAl <sub>2</sub> O <sub>7</sub> | 680 | 3.18 | (GeTe) <sub>0.8</sub> (AgSnSe <sub>2</sub> ) <sub>0.2</sub>               | 323 | 2.03 |
| Sm <sub>2</sub> SrAl <sub>2</sub> O <sub>7</sub> | 780 | 3.05 | (GeTe) <sub>0.8</sub> (AgSnSe <sub>2</sub> ) <sub>0.2</sub>               | 423 | 2.31 |
| Sm <sub>2</sub> SrAl <sub>2</sub> O <sub>7</sub> | 880 | 2.9  | (GeTe) <sub>0.8</sub> (AgSnSe <sub>2</sub> ) <sub>0.2</sub>               | 523 | 2.6  |
| Eu <sub>2</sub> SrAl <sub>2</sub> O <sub>7</sub> | 300 | 3.74 | (GeTe) <sub>0.8</sub> (AgSnSe <sub>2</sub> ) <sub>0.2</sub>               | 623 | 2.51 |
| Eu <sub>2</sub> SrAl <sub>2</sub> O <sub>7</sub> | 380 | 3.61 | (GeTe) <sub>0.9</sub> (AgSnSe <sub>2</sub> ) <sub>0.1</sub>               | 323 | 2.71 |
| Eu <sub>2</sub> SrAl <sub>2</sub> O <sub>7</sub> | 480 | 3.46 | (GeTe) <sub>0.9</sub> (AgSnSe <sub>2</sub> ) <sub>0.1</sub>               | 423 | 2.99 |
| Eu <sub>2</sub> SrAl <sub>2</sub> O <sub>7</sub> | 580 | 3.25 | (GeTe) <sub>0.9</sub> (AgSnSe <sub>2</sub> ) <sub>0.1</sub>               | 523 | 3.52 |
| Eu <sub>2</sub> SrAl <sub>2</sub> O <sub>7</sub> | 680 | 3.07 | (GeTe) <sub>0.9</sub> (AgSnSe <sub>2</sub> ) <sub>0.1</sub>               | 623 | 3.19 |
| Eu <sub>2</sub> SrAl <sub>2</sub> O <sub>7</sub> | 780 | 2.92 | (SnTe) <sub>0.9</sub> (CuSbTe <sub>2</sub> ) <sub>0.1</sub>               | 321 | 3.73 |
| Eu <sub>2</sub> SrAl <sub>2</sub> O <sub>7</sub> | 880 | 2.78 | (SnTe) <sub>0.9</sub> (CuSbTe <sub>2</sub> ) <sub>0.1</sub>               | 427 | 3.62 |
| Gd <sub>2</sub> SrAl <sub>2</sub> O <sub>7</sub> | 300 | 3.4  | (SnTe) <sub>0.9</sub> (CuSbTe <sub>2</sub> ) <sub>0.1</sub>               | 525 | 3.11 |

|                                                   |     |      |  |                                                                           |     |      |
|---------------------------------------------------|-----|------|--|---------------------------------------------------------------------------|-----|------|
| Gd <sub>2</sub> SrAl <sub>2</sub> O <sub>7</sub>  | 380 | 3.28 |  | (SnTe) <sub>0.9</sub> (CuSbTe <sub>2</sub> ) <sub>0.1</sub>               | 622 | 2.35 |
| Gd <sub>2</sub> SrAl <sub>2</sub> O <sub>7</sub>  | 480 | 3.17 |  | (SnTe) <sub>0.9</sub> (CuSbTe <sub>2</sub> ) <sub>0.1</sub>               | 723 | 2.02 |
| Gd <sub>2</sub> SrAl <sub>2</sub> O <sub>7</sub>  | 580 | 3.08 |  | (SnTe) <sub>0.9</sub> (CuSbTe <sub>2</sub> ) <sub>0.1</sub>               | 824 | 1.55 |
| Gd <sub>2</sub> SrAl <sub>2</sub> O <sub>7</sub>  | 680 | 2.93 |  | Tl <sub>0.7</sub> Co <sub>4</sub> Sn <sub>0.75</sub> Sb <sub>11.25</sub>  | 50  | 2.61 |
| Gd <sub>2</sub> SrAl <sub>2</sub> O <sub>7</sub>  | 780 | 2.82 |  | Tl <sub>0.7</sub> Co <sub>4</sub> Sn <sub>0.75</sub> Sb <sub>11.25</sub>  | 150 | 2.33 |
| Gd <sub>2</sub> SrAl <sub>2</sub> O <sub>7</sub>  | 880 | 2.69 |  | Tl <sub>0.7</sub> Co <sub>4</sub> Sn <sub>0.75</sub> Sb <sub>11.25</sub>  | 200 | 2.29 |
| Dy <sub>2</sub> SrAl <sub>2</sub> O <sub>7</sub>  | 300 | 2.83 |  | Tl <sub>0.7</sub> Co <sub>4</sub> Sn <sub>0.75</sub> Sb <sub>11.25</sub>  | 250 | 2.38 |
| Dy <sub>2</sub> SrAl <sub>2</sub> O <sub>7</sub>  | 380 | 2.72 |  | Sr <sub>0.11</sub> Ba <sub>0.18</sub> Co <sub>4</sub> Sb <sub>12.09</sub> | 300 | 4.64 |
| Dy <sub>2</sub> SrAl <sub>2</sub> O <sub>7</sub>  | 480 | 2.6  |  | Sr <sub>0.11</sub> Ba <sub>0.18</sub> Co <sub>4</sub> Sb <sub>12.09</sub> | 350 | 4.45 |
| Dy <sub>2</sub> SrAl <sub>2</sub> O <sub>7</sub>  | 580 | 2.54 |  | Sr <sub>0.11</sub> Ba <sub>0.18</sub> Co <sub>4</sub> Sb <sub>12.09</sub> | 400 | 4.25 |
| Dy <sub>2</sub> SrAl <sub>2</sub> O <sub>7</sub>  | 680 | 2.52 |  | Sr <sub>0.11</sub> Ba <sub>0.18</sub> Co <sub>4</sub> Sb <sub>12.09</sub> | 450 | 4.16 |
| Dy <sub>2</sub> SrAl <sub>2</sub> O <sub>7</sub>  | 780 | 2.48 |  | Sr <sub>0.11</sub> Ba <sub>0.18</sub> Co <sub>4</sub> Sb <sub>12.09</sub> | 500 | 4.06 |
| Dy <sub>2</sub> SrAl <sub>2</sub> O <sub>7</sub>  | 880 | 2.43 |  | Sr <sub>0.11</sub> Ba <sub>0.18</sub> Co <sub>4</sub> Sb <sub>12.09</sub> | 550 | 4    |
| PrSrFeCrO <sub>6</sub>                            | 300 | 0.92 |  | Sr <sub>0.11</sub> Ba <sub>0.18</sub> Co <sub>4</sub> Sb <sub>12.09</sub> | 600 | 3.93 |
| PrSrFeCrO <sub>6</sub>                            | 380 | 0.92 |  | Sr <sub>0.11</sub> Ba <sub>0.18</sub> Co <sub>4</sub> Sb <sub>12.09</sub> | 650 | 3.9  |
| PrSrFeCrO <sub>6</sub>                            | 460 | 0.92 |  | Sr <sub>0.11</sub> Ba <sub>0.18</sub> Co <sub>4</sub> Sb <sub>12.09</sub> | 700 | 3.87 |
| PrSrFeCrO <sub>6</sub>                            | 580 | 0.93 |  | Sr <sub>0.11</sub> Ba <sub>0.18</sub> Co <sub>4</sub> Sb <sub>12.09</sub> | 750 | 3.9  |
| PrSrFeCrO <sub>6</sub>                            | 700 | 0.94 |  | Sr <sub>0.11</sub> Ba <sub>0.18</sub> Co <sub>4</sub> Sb <sub>12.09</sub> | 800 | 3.93 |
| BiCu <sub>0.90</sub> SeO                          | 323 | 1.19 |  | Sr <sub>0.11</sub> Ba <sub>0.18</sub> Co <sub>4</sub> Sb <sub>12.09</sub> | 850 | 3.97 |
| BiCu <sub>0.90</sub> SeO                          | 523 | 0.91 |  | Sr <sub>0.16</sub> Yb <sub>0.03</sub> Co <sub>4</sub> Sb <sub>11.82</sub> | 300 | 4.05 |
| BiCu <sub>0.90</sub> SeO                          | 723 | 0.71 |  | Sr <sub>0.16</sub> Yb <sub>0.03</sub> Co <sub>4</sub> Sb <sub>11.82</sub> | 350 | 3.9  |
| BiCu <sub>0.90</sub> SeO                          | 923 | 0.65 |  | Sr <sub>0.16</sub> Yb <sub>0.03</sub> Co <sub>4</sub> Sb <sub>11.82</sub> | 400 | 3.74 |
| CrO <sub>0.09</sub> N <sub>0.9</sub>              | 50  | 1.22 |  | Sr <sub>0.16</sub> Yb <sub>0.03</sub> Co <sub>4</sub> Sb <sub>11.82</sub> | 450 | 3.63 |
| CrO <sub>0.09</sub> N <sub>0.9</sub>              | 100 | 3.06 |  | Sr <sub>0.16</sub> Yb <sub>0.03</sub> Co <sub>4</sub> Sb <sub>11.82</sub> | 500 | 3.5  |
| CrO <sub>0.09</sub> N <sub>0.9</sub>              | 150 | 4.19 |  | Sr <sub>0.16</sub> Yb <sub>0.03</sub> Co <sub>4</sub> Sb <sub>11.82</sub> | 550 | 3.45 |
| CrO <sub>0.09</sub> N <sub>0.9</sub>              | 200 | 4.59 |  | Sr <sub>0.16</sub> Yb <sub>0.03</sub> Co <sub>4</sub> Sb <sub>11.82</sub> | 600 | 3.4  |
| CrO <sub>0.09</sub> N <sub>0.9</sub>              | 250 | 4.39 |  | Sr <sub>0.16</sub> Yb <sub>0.03</sub> Co <sub>4</sub> Sb <sub>11.82</sub> | 650 | 3.4  |
| CrO <sub>0.09</sub> N <sub>0.9</sub>              | 275 | 2.68 |  | Sr <sub>0.16</sub> Yb <sub>0.03</sub> Co <sub>4</sub> Sb <sub>11.82</sub> | 700 | 3.41 |
| CrO <sub>0.09</sub> N <sub>0.9</sub>              | 300 | 2.75 |  | Sr <sub>0.16</sub> Yb <sub>0.03</sub> Co <sub>4</sub> Sb <sub>11.82</sub> | 750 | 3.46 |
| Cu <sub>22</sub> Sn <sub>10</sub> S <sub>32</sub> | 300 | 3.51 |  | Sr <sub>0.16</sub> Yb <sub>0.03</sub> Co <sub>4</sub> Sb <sub>11.82</sub> | 800 | 3.5  |
| Cu <sub>22</sub> Sn <sub>10</sub> S <sub>32</sub> | 400 | 3.03 |  | Sr <sub>0.16</sub> Yb <sub>0.03</sub> Co <sub>4</sub> Sb <sub>11.82</sub> | 850 | 3.62 |
| Cu <sub>22</sub> Sn <sub>10</sub> S <sub>32</sub> | 500 | 2.64 |  | Sr <sub>0.21</sub> Yb <sub>0.03</sub> Co <sub>4</sub> Sb <sub>12.12</sub> | 300 | 4.23 |

|                                                   |     |      |  |                                                                           |      |      |
|---------------------------------------------------|-----|------|--|---------------------------------------------------------------------------|------|------|
| Cu <sub>22</sub> Sn <sub>10</sub> S <sub>32</sub> | 600 | 2.34 |  | Sr <sub>0.21</sub> Yb <sub>0.03</sub> Co <sub>4</sub> Sb <sub>12.12</sub> | 350  | 4.08 |
| Cu <sub>22</sub> Sn <sub>10</sub> S <sub>32</sub> | 700 | 2.04 |  | Sr <sub>0.21</sub> Yb <sub>0.03</sub> Co <sub>4</sub> Sb <sub>12.12</sub> | 400  | 3.94 |
| SnSe <sub>0.9</sub> S <sub>0.1</sub>              | 300 | 1.42 |  | Sr <sub>0.21</sub> Yb <sub>0.03</sub> Co <sub>4</sub> Sb <sub>12.12</sub> | 450  | 3.85 |
| SnSe <sub>0.9</sub> S <sub>0.1</sub>              | 373 | 1.17 |  | Sr <sub>0.21</sub> Yb <sub>0.03</sub> Co <sub>4</sub> Sb <sub>12.12</sub> | 500  | 3.77 |
| SnSe <sub>0.9</sub> S <sub>0.1</sub>              | 473 | 0.92 |  | Sr <sub>0.21</sub> Yb <sub>0.03</sub> Co <sub>4</sub> Sb <sub>12.12</sub> | 550  | 3.72 |
| SnSe <sub>0.9</sub> S <sub>0.1</sub>              | 573 | 0.8  |  | Sr <sub>0.21</sub> Yb <sub>0.03</sub> Co <sub>4</sub> Sb <sub>12.12</sub> | 600  | 3.68 |
| SnSe <sub>0.9</sub> S <sub>0.1</sub>              | 673 | 0.69 |  | Sr <sub>0.21</sub> Yb <sub>0.03</sub> Co <sub>4</sub> Sb <sub>12.12</sub> | 650  | 3.64 |
| SnSe <sub>0.9</sub> S <sub>0.1</sub>              | 773 | 0.59 |  | Sr <sub>0.21</sub> Yb <sub>0.03</sub> Co <sub>4</sub> Sb <sub>12.12</sub> | 700  | 3.6  |
| SnSe <sub>0.8</sub> S <sub>0.2</sub>              | 300 | 1.27 |  | Sr <sub>0.21</sub> Yb <sub>0.03</sub> Co <sub>4</sub> Sb <sub>12.12</sub> | 750  | 3.64 |
| SnSe <sub>0.8</sub> S <sub>0.2</sub>              | 373 | 1.29 |  | Sr <sub>0.21</sub> Yb <sub>0.03</sub> Co <sub>4</sub> Sb <sub>12.12</sub> | 800  | 3.67 |
| SnSe <sub>0.8</sub> S <sub>0.2</sub>              | 473 | 0.87 |  | Sr <sub>0.21</sub> Yb <sub>0.03</sub> Co <sub>4</sub> Sb <sub>12.12</sub> | 850  | 3.7  |
| SnSe <sub>0.8</sub> S <sub>0.2</sub>              | 573 | 0.79 |  | Hf <sub>0.5</sub> Ti <sub>0.5</sub> CoSb <sub>0.8</sub> Sn <sub>0.2</sub> | 305  | 2.53 |
| SnSe <sub>0.8</sub> S <sub>0.2</sub>              | 673 | 0.71 |  | Hf <sub>0.5</sub> Ti <sub>0.5</sub> CoSb <sub>0.8</sub> Sn <sub>0.2</sub> | 377  | 2.51 |
| SnSe <sub>0.8</sub> S <sub>0.2</sub>              | 773 | 0.58 |  | Hf <sub>0.5</sub> Ti <sub>0.5</sub> CoSb <sub>0.8</sub> Sn <sub>0.2</sub> | 473  | 2.51 |
| BaNd <sub>2</sub> Ti <sub>3</sub> O <sub>10</sub> | 300 | 1.2  |  | Hf <sub>0.5</sub> Ti <sub>0.5</sub> CoSb <sub>0.8</sub> Sn <sub>0.2</sub> | 575  | 2.51 |
| BaNd <sub>2</sub> Ti <sub>3</sub> O <sub>10</sub> | 350 | 1.13 |  | Hf <sub>0.5</sub> Ti <sub>0.5</sub> CoSb <sub>0.8</sub> Sn <sub>0.2</sub> | 676  | 2.47 |
| BaNd <sub>2</sub> Ti <sub>3</sub> O <sub>10</sub> | 400 | 1.1  |  | Hf <sub>0.5</sub> Ti <sub>0.5</sub> CoSb <sub>0.8</sub> Sn <sub>0.2</sub> | 779  | 2.47 |
| BaNd <sub>2</sub> Ti <sub>3</sub> O <sub>10</sub> | 450 | 1.1  |  | Hf <sub>0.5</sub> Ti <sub>0.5</sub> CoSb <sub>0.8</sub> Sn <sub>0.2</sub> | 885  | 2.49 |
| BaNd <sub>2</sub> Ti <sub>3</sub> O <sub>10</sub> | 500 | 1.08 |  | Hf <sub>0.5</sub> Ti <sub>0.5</sub> CoSb <sub>0.8</sub> Sn <sub>0.2</sub> | 989  | 2.57 |
| BaNd <sub>2</sub> Ti <sub>3</sub> O <sub>10</sub> | 550 | 1.04 |  | Hf <sub>0.7</sub> Ti <sub>0.3</sub> CoSb <sub>0.8</sub> Sn <sub>0.2</sub> | 305  | 2.78 |
| BaNd <sub>2</sub> Ti <sub>3</sub> O <sub>10</sub> | 600 | 1.02 |  | Hf <sub>0.7</sub> Ti <sub>0.3</sub> CoSb <sub>0.8</sub> Sn <sub>0.2</sub> | 377  | 2.8  |
| BiCu <sub>0.925</sub> SeO                         | 323 | 1.4  |  | Hf <sub>0.7</sub> Ti <sub>0.3</sub> CoSb <sub>0.8</sub> Sn <sub>0.2</sub> | 473  | 2.81 |
| BiCu <sub>0.925</sub> SeO                         | 523 | 1.1  |  | Hf <sub>0.7</sub> Ti <sub>0.3</sub> CoSb <sub>0.8</sub> Sn <sub>0.2</sub> | 575  | 2.83 |
| BiCu <sub>0.925</sub> SeO                         | 723 | 0.93 |  | Hf <sub>0.7</sub> Ti <sub>0.3</sub> CoSb <sub>0.8</sub> Sn <sub>0.2</sub> | 676  | 2.84 |
| BiCu <sub>0.925</sub> SeO                         | 923 | 0.87 |  | Hf <sub>0.7</sub> Ti <sub>0.3</sub> CoSb <sub>0.8</sub> Sn <sub>0.2</sub> | 779  | 2.85 |
| BiCu <sub>0.975</sub> SeO                         | 323 | 0.79 |  | Hf <sub>0.7</sub> Ti <sub>0.3</sub> CoSb <sub>0.8</sub> Sn <sub>0.2</sub> | 885  | 2.86 |
| BiCu <sub>0.975</sub> SeO                         | 523 | 0.57 |  | Hf <sub>0.7</sub> Ti <sub>0.3</sub> CoSb <sub>0.8</sub> Sn <sub>0.2</sub> | 989  | 2.87 |
| BiCu <sub>0.975</sub> SeO                         | 723 | 0.46 |  | Hf <sub>0.7</sub> Ti <sub>0.3</sub> CoSb <sub>0.8</sub> Sn <sub>0.2</sub> | 1088 | 2.9  |
| BiCu <sub>0.975</sub> SeO                         | 923 | 0.48 |  | Hf <sub>0.8</sub> Ti <sub>0.2</sub> CoSb <sub>0.8</sub> Sn <sub>0.2</sub> | 305  | 2.76 |
| Sn <sub>0.8</sub> Ge <sub>0.2</sub> Te            | 373 | 4.84 |  | Hf <sub>0.8</sub> Ti <sub>0.2</sub> CoSb <sub>0.8</sub> Sn <sub>0.2</sub> | 377  | 2.8  |
| Sn <sub>0.8</sub> Ge <sub>0.2</sub> Te            | 473 | 4.72 |  | Hf <sub>0.8</sub> Ti <sub>0.2</sub> CoSb <sub>0.8</sub> Sn <sub>0.2</sub> | 480  | 2.79 |
| Sn <sub>0.8</sub> Ge <sub>0.2</sub> Te            | 573 | 4.37 |  | Hf <sub>0.8</sub> Ti <sub>0.2</sub> CoSb <sub>0.8</sub> Sn <sub>0.2</sub> | 580  | 2.8  |

|                                                                 |     |       |  |                                                                            |      |      |
|-----------------------------------------------------------------|-----|-------|--|----------------------------------------------------------------------------|------|------|
| Sn <sub>0.8</sub> Ge <sub>0.2</sub> Te                          | 673 | 3.66  |  | Hf <sub>0.8</sub> Ti <sub>0.2</sub> CoSb <sub>0.8</sub> Sn <sub>0.2</sub>  | 682  | 2.73 |
| Sn <sub>0.8</sub> Ge <sub>0.2</sub> Te                          | 773 | 3.45  |  | Hf <sub>0.8</sub> Ti <sub>0.2</sub> CoSb <sub>0.8</sub> Sn <sub>0.2</sub>  | 784  | 2.68 |
| Sn <sub>0.8</sub> Ge <sub>0.2</sub> Te                          | 873 | 3.1   |  | Hf <sub>0.8</sub> Ti <sub>0.2</sub> CoSb <sub>0.8</sub> Sn <sub>0.2</sub>  | 885  | 2.67 |
| Cu <sub>22</sub> Sn <sub>9</sub> Sb <sub>3</sub> S <sub>2</sub> | 300 | 2.8   |  | Hf <sub>0.8</sub> Ti <sub>0.2</sub> CoSb <sub>0.8</sub> Sn <sub>0.2</sub>  | 987  | 2.67 |
| Cu <sub>22</sub> Sn <sub>9</sub> Sb <sub>3</sub> S <sub>2</sub> | 400 | 2.29  |  | Hf <sub>0.8</sub> Ti <sub>0.2</sub> CoSb <sub>0.8</sub> Sn <sub>0.2</sub>  | 1088 | 2.75 |
| Cu <sub>22</sub> Sn <sub>9</sub> Sb <sub>3</sub> S <sub>2</sub> | 500 | 1.93  |  | Hf <sub>0.9</sub> Ti <sub>0.1</sub> CoSb <sub>0.8</sub> Sn <sub>0.2</sub>  | 305  | 3.45 |
| Cu <sub>22</sub> Sn <sub>9</sub> Sb <sub>3</sub> S <sub>2</sub> | 600 | 1.68  |  | Hf <sub>0.9</sub> Ti <sub>0.1</sub> CoSb <sub>0.8</sub> Sn <sub>0.2</sub>  | 377  | 3.39 |
| Cu <sub>22</sub> Sn <sub>9</sub> Sb <sub>3</sub> S <sub>2</sub> | 700 | 1.47  |  | Hf <sub>0.9</sub> Ti <sub>0.1</sub> CoSb <sub>0.8</sub> Sn <sub>0.2</sub>  | 473  | 3.38 |
| Cu <sub>5</sub> SnSbSe <sub>6.3</sub>                           | 300 | 2.74  |  | Hf <sub>0.9</sub> Ti <sub>0.1</sub> CoSb <sub>0.8</sub> Sn <sub>0.2</sub>  | 575  | 3.35 |
| Cu <sub>5</sub> SnSbSe <sub>6.3</sub>                           | 373 | 2.67  |  | Hf <sub>0.9</sub> Ti <sub>0.1</sub> CoSb <sub>0.8</sub> Sn <sub>0.2</sub>  | 676  | 3.3  |
| Cu <sub>5</sub> SnSbSe <sub>6.3</sub>                           | 473 | 2.38  |  | Hf <sub>0.9</sub> Ti <sub>0.1</sub> CoSb <sub>0.8</sub> Sn <sub>0.2</sub>  | 779  | 3.24 |
| Cu <sub>5</sub> SnSbSe <sub>6.3</sub>                           | 573 | 2.28  |  | Hf <sub>0.9</sub> Ti <sub>0.1</sub> CoSb <sub>0.8</sub> Sn <sub>0.2</sub>  | 885  | 3.24 |
| Cu <sub>5</sub> SnSbSe <sub>6.3</sub>                           | 673 | 2.06  |  | Hf <sub>0.9</sub> Ti <sub>0.1</sub> CoSb <sub>0.8</sub> Sn <sub>0.2</sub>  | 989  | 3.29 |
| Cu <sub>5</sub> SnSbSe <sub>6.3</sub>                           | 723 | 1.86  |  | Hf <sub>0.9</sub> Ti <sub>0.1</sub> CoSb <sub>0.8</sub> Sn <sub>0.2</sub>  | 1088 | 3.31 |
| Sr <sub>0.4</sub> Co <sub>4</sub> Sb <sub>12</sub>              | 300 | 2.69  |  | Zn <sub>0.9</sub> Cd <sub>0.1</sub> Sc <sub>0.01</sub> O <sub>1.015</sub>  | 300  | 8.17 |
| Sr <sub>0.4</sub> Co <sub>4</sub> Sb <sub>12</sub>              | 350 | 2.47  |  | Zn <sub>0.9</sub> Cd <sub>0.1</sub> Sc <sub>0.01</sub> O <sub>1.015</sub>  | 473  | 5.7  |
| Sr <sub>0.4</sub> Co <sub>4</sub> Sb <sub>12</sub>              | 400 | 2.19  |  | Zn <sub>0.9</sub> Cd <sub>0.1</sub> Sc <sub>0.01</sub> O <sub>1.015</sub>  | 573  | 4.94 |
| Sr <sub>0.4</sub> Co <sub>4</sub> Sb <sub>12</sub>              | 450 | 1.86  |  | Zn <sub>0.9</sub> Cd <sub>0.1</sub> Sc <sub>0.01</sub> O <sub>1.015</sub>  | 673  | 4.39 |
| Sr <sub>0.4</sub> Co <sub>4</sub> Sb <sub>12</sub>              | 500 | 1.52  |  | Zn <sub>0.9</sub> Cd <sub>0.1</sub> Sc <sub>0.01</sub> O <sub>1.015</sub>  | 773  | 4    |
| Sr <sub>0.4</sub> Co <sub>4</sub> Sb <sub>12</sub>              | 550 | 1.22  |  | Zn <sub>0.9</sub> Cd <sub>0.1</sub> Sc <sub>0.03</sub> O <sub>1.045</sub>  | 300  | 7.91 |
| Sr <sub>0.4</sub> Co <sub>4</sub> Sb <sub>12</sub>              | 600 | 0.97  |  | Zn <sub>0.9</sub> Cd <sub>0.1</sub> Sc <sub>0.03</sub> O <sub>1.045</sub>  | 373  | 6.6  |
| Sr <sub>0.4</sub> Co <sub>4</sub> Sb <sub>12</sub>              | 650 | 0.72  |  | Zn <sub>0.9</sub> Cd <sub>0.1</sub> Sc <sub>0.03</sub> O <sub>1.045</sub>  | 473  | 5.62 |
| Sr <sub>0.4</sub> Co <sub>4</sub> Sb <sub>12</sub>              | 700 | 0.55  |  | Zn <sub>0.9</sub> Cd <sub>0.1</sub> Sc <sub>0.03</sub> O <sub>1.045</sub>  | 573  | 4.93 |
| Sr <sub>0.4</sub> Co <sub>4</sub> Sb <sub>12</sub>              | 750 | 0.39  |  | Zn <sub>0.9</sub> Cd <sub>0.1</sub> Sc <sub>0.03</sub> O <sub>1.045</sub>  | 673  | 4.38 |
| ZnSc <sub>0.02</sub> O <sub>1.03</sub>                          | 300 | 52.17 |  | Zn <sub>0.9</sub> Cd <sub>0.1</sub> Sc <sub>0.03</sub> O <sub>1.045</sub>  | 773  | 3.94 |
| ZnSc <sub>0.02</sub> O <sub>1.03</sub>                          | 373 | 37.1  |  | Zn <sub>0.9</sub> Cd <sub>0.1</sub> Sc <sub>0.03</sub> O <sub>1.045</sub>  | 873  | 3.61 |
| ZnSc <sub>0.02</sub> O <sub>1.03</sub>                          | 473 | 26.08 |  | Zn <sub>0.9</sub> Cd <sub>0.1</sub> Sc <sub>0.03</sub> O <sub>1.045</sub>  | 973  | 3.3  |
| ZnSc <sub>0.02</sub> O <sub>1.03</sub>                          | 573 | 19.58 |  | Zn <sub>0.9</sub> Cd <sub>0.1</sub> Sc <sub>0.03</sub> O <sub>1.045</sub>  | 1073 | 3.02 |
| ZnSc <sub>0.02</sub> O <sub>1.03</sub>                          | 673 | 15.08 |  | Zn <sub>0.9</sub> Cd <sub>0.1</sub> Sc <sub>0.03</sub> O <sub>1.045</sub>  | 1173 | 2.76 |
| ZnSc <sub>0.02</sub> O <sub>1.03</sub>                          | 773 | 12.08 |  | (Sn <sub>0.8</sub> Ge <sub>0.2</sub> ) <sub>0.8</sub> Mn <sub>0.2</sub> Te | 298  | 2.23 |
| ZnSc <sub>0.02</sub> O <sub>1.03</sub>                          | 873 | 10    |  | (Sn <sub>0.8</sub> Ge <sub>0.2</sub> ) <sub>0.8</sub> Mn <sub>0.2</sub> Te | 373  | 1.98 |
| ZnSc <sub>0.02</sub> O <sub>1.03</sub>                          | 973 | 8.08  |  | (Sn <sub>0.8</sub> Ge <sub>0.2</sub> ) <sub>0.8</sub> Mn <sub>0.2</sub> Te | 473  | 1.74 |

|               |      |      |  |                        |     |      |
|---------------|------|------|--|------------------------|-----|------|
| ZnSc0.02O1.03 | 1073 | 6.75 |  | (Sn0.8Ge0.2)0.8Mn0.2Te | 573 | 1.68 |
| ZnSc0.02O1.03 | 1173 | 5.7  |  | (Sn0.8Ge0.2)0.8Mn0.2Te | 673 | 1.57 |
| SnS0.88Se0.12 | 300  | 2.37 |  | (Sn0.8Ge0.2)0.8Mn0.2Te | 773 | 1.56 |
| SnS0.88Se0.12 | 423  | 1.82 |  | (Sn0.8Ge0.2)0.8Mn0.2Te | 873 | 1.51 |
| SnS0.88Se0.12 | 573  | 1.27 |  | Sn0.965Pb0.01Cd0.025Se | 300 | 1.02 |
| SnS0.88Se0.12 | 872  | 1    |  | Sn0.965Pb0.01Cd0.025Se | 373 | 0.78 |
| SnS0.88Se0.12 | 723  | 0.99 |  | Sn0.965Pb0.01Cd0.025Se | 423 | 0.7  |
| SnS0.91Se0.09 | 300  | 2.3  |  | Sn0.965Pb0.01Cd0.025Se | 473 | 0.62 |
| SnS0.91Se0.09 | 423  | 1.71 |  | Sn0.965Pb0.01Cd0.025Se | 573 | 0.5  |
| SnS0.91Se0.09 | 573  | 1.22 |  | Sn0.965Pb0.01Cd0.025Se | 673 | 0.41 |
| SnS0.91Se0.09 | 723  | 0.87 |  | Sn0.965Pb0.01Cd0.025Se | 723 | 0.41 |
| SnS0.91Se0.09 | 873  | 0.63 |  | Sn0.965Pb0.01Cd0.025Se | 823 | 0.42 |
| SnS0.94Se0.06 | 300  | 2.55 |  | Sn0.965Pb0.01Cd0.025Se | 873 | 0.41 |
| SnS0.94Se0.06 | 423  | 1.81 |  | Sn0.975Pb0.01Cd0.015Se | 300 | 1.24 |
| SnS0.94Se0.06 | 573  | 1.33 |  | Sn0.975Pb0.01Cd0.015Se | 373 | 0.96 |
| SnS0.94Se0.06 | 723  | 1.03 |  | Sn0.975Pb0.01Cd0.015Se | 423 | 0.85 |
| SnS0.94Se0.06 | 873  | 0.67 |  | Sn0.975Pb0.01Cd0.015Se | 473 | 0.76 |
| SnS0.97Se0.03 | 300  | 2.92 |  | Sn0.975Pb0.01Cd0.015Se | 573 | 0.62 |
| SnS0.97Se0.03 | 423  | 2.19 |  | Sn0.975Pb0.01Cd0.015Se | 673 | 0.52 |
| SnS0.97Se0.03 | 573  | 1.49 |  | Sn0.975Pb0.01Cd0.015Se | 723 | 0.52 |
| Zn0.96Al0.04O | 373  | 5.83 |  | Sn0.975Pb0.01Cd0.015Se | 823 | 0.53 |
| Zn0.96Al0.04O | 473  | 4.52 |  | Sn0.975Pb0.01Cd0.015Se | 873 | 0.52 |
| Zn0.96Al0.04O | 573  | 3.7  |  | Ti0.9Mn0.1NiSn0.9Sb0.1 | 297 | 6.86 |
| Zn0.96Al0.04O | 673  | 2.67 |  | Ti0.9Mn0.1NiSn0.9Sb0.1 | 398 | 6.4  |
| Zn0.97Al0.03O | 373  | 7.4  |  | Ti0.9Mn0.1NiSn0.9Sb0.1 | 498 | 6.09 |
| Zn0.97Al0.03O | 473  | 6.7  |  | Ti0.9Mn0.1NiSn0.9Sb0.1 | 598 | 5.86 |
| Zn0.97Al0.03O | 573  | 5.96 |  | Ti0.9Mn0.1NiSn0.9Sb0.1 | 697 | 5.65 |
| Zn0.97Al0.03O | 673  | 5.38 |  | Ti0.9Mn0.1NiSn0.9Sb0.1 | 797 | 5.55 |
| Cu5SnSbSe6.58 | 300  | 4.17 |  | Ti0.9Mn0.1NiSn0.9Sb0.1 | 871 | 5.55 |
| Cu5SnSbSe6.58 | 373  | 3.96 |  | Cu2ZnSn0.925Ag0.075Se4 | 323 | 3.94 |
| Cu5SnSbSe6.58 | 473  | 3.62 |  | Cu2ZnSn0.925Ag0.075Se4 | 373 | 3.31 |
| Cu5SnSbSe6.58 | 573  | 3.38 |  | Cu2ZnSn0.925Ag0.075Se4 | 473 | 2.9  |

|               |     |      |  |                         |      |      |
|---------------|-----|------|--|-------------------------|------|------|
| Cu5SnSbSe6.58 | 673 | 2.95 |  | Cu2ZnSn0.925Ag0.075Se4  | 573  | 2.33 |
| Cu5SnSbSe6.58 | 723 | 2.6  |  | Cu2ZnSn0.925Ag0.075Se4  | 673  | 1.87 |
| Cu5SnSbSe6.79 | 300 | 4.72 |  | Nb0.8Ta0.2CoSn0.9Sb0.1  | 338  | 4.92 |
| Cu5SnSbSe6.79 | 373 | 4.52 |  | Nb0.8Ta0.2CoSn0.9Sb0.1  | 430  | 4.73 |
| Cu5SnSbSe6.79 | 473 | 4.17 |  | Nb0.8Ta0.2CoSn0.9Sb0.1  | 530  | 4.49 |
| Cu5SnSbSe6.79 | 573 | 3.82 |  | Nb0.8Ta0.2CoSn0.9Sb0.1  | 628  | 4.35 |
| Cu5SnSbSe6.79 | 673 | 3.44 |  | Nb0.8Ta0.2CoSn0.9Sb0.1  | 728  | 4.19 |
| Cu5SnSbSe6.79 | 723 | 3.16 |  | Nb0.8Ta0.2CoSn0.9Sb0.1  | 826  | 4    |
| (SnTe)8Sb2Te3 | 323 | 2.05 |  | Nb0.8Ta0.2CoSn0.9Sb0.1  | 924  | 3.86 |
| (SnTe)8Sb2Te3 | 423 | 1.89 |  | Nb0.9Ta0.1CoSn0.9Sb0.1  | 338  | 5.32 |
| (SnTe)8Sb2Te3 | 523 | 1.71 |  | Nb0.9Ta0.1CoSn0.9Sb0.1  | 430  | 5.02 |
| (SnTe)8Sb2Te3 | 623 | 1.65 |  | Nb0.9Ta0.1CoSn0.9Sb0.1  | 530  | 4.81 |
| (SnTe)8Sb2Te3 | 673 | 1.66 |  | Nb0.9Ta0.1CoSn0.9Sb0.1  | 628  | 4.54 |
| (SnTe)8Sb2Te3 | 723 | 1.73 |  | Nb0.9Ta0.1CoSn0.9Sb0.1  | 728  | 4.35 |
| (SnTe)8Sb2Te3 | 773 | 1.83 |  | Nb0.9Ta0.1CoSn0.9Sb0.1  | 826  | 4.21 |
| TiZr0.005NiSn | 323 | 2.93 |  | Nb0.9Ta0.1CoSn0.9Sb0.1  | 924  | 4.09 |
| TiZr0.005NiSn | 423 | 2.67 |  | La1.7Gd0.15Yb0.15Zr2O7  | 540  | 2.25 |
| TiZr0.005NiSn | 522 | 2.58 |  | La1.7Gd0.15Yb0.15Zr2O7  | 560  | 2.1  |
| TiZr0.005NiSn | 626 | 2.68 |  | La1.7Gd0.15Yb0.15Zr2O7  | 600  | 2    |
| TiZr0.005NiSn | 729 | 3.02 |  | La1.7Gd0.15Yb0.15Zr2O7  | 650  | 1.89 |
| TiZr0.015NiSn | 323 | 2.57 |  | La1.7Gd0.15Yb0.15Zr2O7  | 700  | 1.86 |
| TiZr0.015NiSn | 423 | 2.38 |  | Zn0.85Cd0.15Sc0.02O1.03 | 300  | 7.58 |
| TiZr0.015NiSn | 522 | 2.37 |  | Zn0.85Cd0.15Sc0.02O1.03 | 373  | 6.58 |
| TiZr0.015NiSn | 626 | 2.46 |  | Zn0.85Cd0.15Sc0.02O1.03 | 473  | 5.75 |
| TiZr0.015NiSn | 729 | 2.74 |  | Zn0.85Cd0.15Sc0.02O1.03 | 573  | 5    |
| TiZr0.025NiSn | 323 | 3.08 |  | Zn0.85Cd0.15Sc0.02O1.03 | 673  | 4.42 |
| TiZr0.025NiSn | 424 | 2.78 |  | Zn0.85Cd0.15Sc0.02O1.03 | 773  | 4.08 |
| TiZr0.025NiSn | 526 | 2.68 |  | Zn0.85Cd0.15Sc0.02O1.03 | 873  | 3.8  |
| TiZr0.025NiSn | 630 | 2.69 |  | Zn0.85Cd0.15Sc0.02O1.03 | 973  | 3.33 |
| TiZr0.025NiSn | 736 | 2.99 |  | Zn0.85Cd0.15Sc0.02O1.03 | 1073 | 3.25 |
| Sr0.12Co4Sb12 | 300 | 5.16 |  | Zn0.85Cd0.15Sc0.02O1.03 | 1173 | 3.15 |
| Sr0.12Co4Sb12 | 350 | 4.58 |  | Zn0.95Cd0.05Sc0.02O1.03 | 300  | 11.5 |

|               |     |      |  |                         |      |      |
|---------------|-----|------|--|-------------------------|------|------|
| Sr0.12Co4Sb12 | 400 | 4.11 |  | Zn0.95Cd0.05Sc0.02O1.03 | 373  | 9.75 |
| Sr0.12Co4Sb12 | 450 | 3.69 |  | Zn0.95Cd0.05Sc0.02O1.03 | 473  | 8    |
| Sr0.12Co4Sb12 | 500 | 3.25 |  | Zn0.95Cd0.05Sc0.02O1.03 | 573  | 6.75 |
| Sr0.12Co4Sb12 | 550 | 2.86 |  | Zn0.95Cd0.05Sc0.02O1.03 | 673  | 5.92 |
| Sr0.12Co4Sb12 | 600 | 2.64 |  | Zn0.95Cd0.05Sc0.02O1.03 | 773  | 5.2  |
| Sr0.12Co4Sb12 | 650 | 2.39 |  | Zn0.95Cd0.05Sc0.02O1.03 | 873  | 4.58 |
| Sr0.12Co4Sb12 | 700 | 2.33 |  | Zn0.95Cd0.05Sc0.02O1.03 | 973  | 4.08 |
| Sr0.12Co4Sb12 | 750 | 2.28 |  | Zn0.95Cd0.05Sc0.02O1.03 | 1073 | 3.75 |
| Sr0.17Co4Sb12 | 300 | 4.64 |  | Zn0.95Cd0.05Sc0.02O1.03 | 1173 | 3.43 |
| Sr0.17Co4Sb12 | 350 | 4.11 |  | Zn0.9Cd0.1Sc0.006O1.009 | 300  | 8.44 |
| Sr0.17Co4Sb12 | 400 | 3.66 |  | Zn0.9Cd0.1Sc0.006O1.009 | 773  | 4.23 |
| Sr0.17Co4Sb12 | 450 | 3.33 |  | Zn0.9Cd0.1Sc0.006O1.009 | 973  | 3.4  |
| Sr0.17Co4Sb12 | 500 | 3    |  | Zn0.9Cd0.1Sc0.006O1.009 | 1073 | 3.2  |
| Sr0.17Co4Sb12 | 550 | 2.64 |  | Zn0.9Cd0.1Sc0.006O1.009 | 1173 | 2.92 |
| Sr0.17Co4Sb12 | 600 | 2.39 |  | Cu5.133Sn1.866S6.3Cl0.7 | 327  | 2    |
| Sr0.17Co4Sb12 | 650 | 2.19 |  | Cu5.133Sn1.866S6.3Cl0.7 | 426  | 1.76 |
| Sr0.17Co4Sb12 | 700 | 1.91 |  | Cu5.133Sn1.866S6.3Cl0.7 | 529  | 1.55 |
| Sr0.17Co4Sb12 | 750 | 1.89 |  | Cu5.133Sn1.866S6.3Cl0.7 | 633  | 1.4  |
| Sr0.22Co4Sb12 | 300 | 4.16 |  | Cu5.133Sn1.866S6.3Cl0.7 | 685  | 1.33 |
| Sr0.22Co4Sb12 | 350 | 3.69 |  | Ag0.01Sn0.99Se0.65S0.35 | 322  | 0.29 |
| Sr0.22Co4Sb12 | 400 | 3.28 |  | Ag0.01Sn0.99Se0.65S0.35 | 418  | 0.23 |
| Sr0.22Co4Sb12 | 450 | 2.89 |  | Ag0.01Sn0.99Se0.65S0.35 | 518  | 0.19 |
| Sr0.22Co4Sb12 | 500 | 2.55 |  | Ag0.01Sn0.99Se0.65S0.35 | 567  | 0.18 |
| Sr0.22Co4Sb12 | 550 | 2.33 |  | Ag0.01Sn0.99Se0.65S0.35 | 616  | 0.18 |
| Sr0.22Co4Sb12 | 600 | 1.97 |  | Ag0.01Sn0.99Se0.65S0.35 | 666  | 0.19 |
| Sr0.22Co4Sb12 | 650 | 1.78 |  | Ag0.01Sn0.99Se0.65S0.35 | 763  | 0.21 |
| Sr0.22Co4Sb12 | 700 | 1.58 |  | Ag0.01Sn0.99Se0.65S0.35 | 813  | 0.18 |
| Sr0.22Co4Sb12 | 750 | 1.44 |  | Ag0.01Sn0.99Se0.85S0.15 | 322  | 0.21 |
| Sr0.28Co4Sb12 | 300 | 3.5  |  | Ag0.01Sn0.99Se0.85S0.15 | 418  | 0.19 |
| Sr0.28Co4Sb12 | 350 | 3.14 |  | Ag0.01Sn0.99Se0.85S0.15 | 518  | 0.16 |
| Sr0.28Co4Sb12 | 400 | 2.8  |  | Ag0.01Sn0.99Se0.85S0.15 | 567  | 0.14 |
| Sr0.28Co4Sb12 | 450 | 2.5  |  | Ag0.01Sn0.99Se0.85S0.15 | 616  | 0.13 |

|                                                      |      |      |  |                                                                            |     |      |
|------------------------------------------------------|------|------|--|----------------------------------------------------------------------------|-----|------|
| Sr <sub>0.28</sub> Co <sub>4</sub> Sb <sub>12</sub>  | 500  | 2.25 |  | Ag <sub>0.01</sub> Sn <sub>0.99</sub> Se <sub>0.85</sub> S <sub>0.15</sub> | 666 | 0.14 |
| Sr <sub>0.28</sub> Co <sub>4</sub> Sb <sub>12</sub>  | 550  | 1.91 |  | Ag <sub>0.01</sub> Sn <sub>0.99</sub> Se <sub>0.85</sub> S <sub>0.15</sub> | 763 | 0.13 |
| Sr <sub>0.28</sub> Co <sub>4</sub> Sb <sub>12</sub>  | 600  | 1.75 |  | Ag <sub>0.01</sub> Sn <sub>0.99</sub> Se <sub>0.85</sub> S <sub>0.15</sub> | 813 | 0.12 |
| Sr <sub>0.28</sub> Co <sub>4</sub> Sb <sub>12</sub>  | 650  | 1.5  |  | Sn <sub>0.91</sub> Mn <sub>0.09</sub> Te <sub>0.97</sub> I <sub>0.03</sub> | 331 | 3.53 |
| Sr <sub>0.28</sub> Co <sub>4</sub> Sb <sub>12</sub>  | 700  | 1.3  |  | Sn <sub>0.91</sub> Mn <sub>0.09</sub> Te <sub>0.97</sub> I <sub>0.03</sub> | 424 | 3.18 |
| Sr <sub>0.28</sub> Co <sub>4</sub> Sb <sub>12</sub>  | 750  | 1.19 |  | Sn <sub>0.91</sub> Mn <sub>0.09</sub> Te <sub>0.97</sub> I <sub>0.03</sub> | 524 | 2.75 |
| AgSn <sub>5.0</sub> BiTe <sub>7.0</sub>              | 300  | 1.61 |  | Sn <sub>0.91</sub> Mn <sub>0.09</sub> Te <sub>0.97</sub> I <sub>0.03</sub> | 622 | 2.41 |
| AgSn <sub>5.0</sub> BiTe <sub>7.0</sub>              | 400  | 1.63 |  | Sn <sub>0.91</sub> Mn <sub>0.09</sub> Te <sub>0.97</sub> I <sub>0.03</sub> | 720 | 1.92 |
| AgSn <sub>5.0</sub> BiTe <sub>7.0</sub>              | 600  | 2.13 |  | Sn <sub>0.91</sub> Mn <sub>0.09</sub> Te <sub>0.97</sub> I <sub>0.03</sub> | 818 | 1.56 |
| AgSn <sub>5.0</sub> BiTe <sub>7.0</sub>              | 500  | 1.82 |  | Sn <sub>0.91</sub> Mn <sub>0.09</sub> Te <sub>0.97</sub> I <sub>0.03</sub> | 867 | 1.53 |
| LaCo <sub>0.5</sub> Fe <sub>0.5</sub> O <sub>3</sub> | 300  | 0.22 |  | Sn <sub>0.91</sub> Mn <sub>0.09</sub> Te <sub>0.97</sub> I <sub>0.03</sub> | 891 | 1.55 |
| LaCo <sub>0.9</sub> Fe <sub>0.1</sub> O <sub>3</sub> | 300  | 0.26 |  | Sn <sub>0.91</sub> Mn <sub>0.09</sub> Te <sub>0.98</sub> I <sub>0.02</sub> | 331 | 3.37 |
| LaCo <sub>0.9</sub> Ni <sub>0.1</sub> O <sub>3</sub> | 300  | 0.43 |  | Sn <sub>0.91</sub> Mn <sub>0.09</sub> Te <sub>0.98</sub> I <sub>0.02</sub> | 424 | 3.02 |
| La <sub>0.1</sub> Ca <sub>0.9</sub> TiO <sub>3</sub> | 538  | 3.5  |  | Sn <sub>0.91</sub> Mn <sub>0.09</sub> Te <sub>0.98</sub> I <sub>0.02</sub> | 524 | 2.57 |
| La <sub>0.1</sub> Ca <sub>0.9</sub> TiO <sub>3</sub> | 640  | 3.24 |  | Sn <sub>0.91</sub> Mn <sub>0.09</sub> Te <sub>0.98</sub> I <sub>0.02</sub> | 622 | 2.28 |
| La <sub>0.1</sub> Ca <sub>0.9</sub> TiO <sub>3</sub> | 740  | 3.03 |  | Sn <sub>0.91</sub> Mn <sub>0.09</sub> Te <sub>0.98</sub> I <sub>0.02</sub> | 720 | 1.8  |
| La <sub>0.1</sub> Ca <sub>0.9</sub> TiO <sub>3</sub> | 840  | 2.94 |  | Sn <sub>0.91</sub> Mn <sub>0.09</sub> Te <sub>0.98</sub> I <sub>0.02</sub> | 818 | 1.49 |
| La <sub>0.2</sub> Ca <sub>0.8</sub> TiO <sub>3</sub> | 321  | 4.27 |  | Sn <sub>0.91</sub> Mn <sub>0.09</sub> Te <sub>0.98</sub> I <sub>0.02</sub> | 867 | 1.47 |
| La <sub>0.2</sub> Ca <sub>0.8</sub> TiO <sub>3</sub> | 432  | 3.78 |  | Sn <sub>0.91</sub> Mn <sub>0.09</sub> Te <sub>0.98</sub> I <sub>0.02</sub> | 891 | 1.48 |
| La <sub>0.2</sub> Ca <sub>0.8</sub> TiO <sub>3</sub> | 538  | 3.41 |  | Sn <sub>0.91</sub> Mn <sub>0.09</sub> Te <sub>0.99</sub> I <sub>0.01</sub> | 331 | 3.76 |
| La <sub>0.2</sub> Ca <sub>0.8</sub> TiO <sub>3</sub> | 740  | 2.96 |  | Sn <sub>0.91</sub> Mn <sub>0.09</sub> Te <sub>0.99</sub> I <sub>0.01</sub> | 424 | 3.46 |
| La <sub>0.2</sub> Ca <sub>0.8</sub> TiO <sub>3</sub> | 840  | 2.85 |  | Sn <sub>0.91</sub> Mn <sub>0.09</sub> Te <sub>0.99</sub> I <sub>0.01</sub> | 524 | 3.05 |
| La <sub>0.2</sub> Ca <sub>0.8</sub> TiO <sub>3</sub> | 1016 | 2.61 |  | Sn <sub>0.91</sub> Mn <sub>0.09</sub> Te <sub>0.99</sub> I <sub>0.01</sub> | 622 | 2.87 |
| Sn <sub>0.98</sub> In <sub>0.02</sub> Se             | 373  | 0.8  |  | Sn <sub>0.91</sub> Mn <sub>0.09</sub> Te <sub>0.99</sub> I <sub>0.01</sub> | 720 | 2.27 |
| Sn <sub>0.98</sub> In <sub>0.02</sub> Se             | 423  | 0.72 |  | Sn <sub>0.91</sub> Mn <sub>0.09</sub> Te <sub>0.99</sub> I <sub>0.01</sub> | 818 | 1.8  |
| Sn <sub>0.98</sub> In <sub>0.02</sub> Se             | 473  | 0.67 |  | Sn <sub>0.91</sub> Mn <sub>0.09</sub> Te <sub>0.99</sub> I <sub>0.01</sub> | 867 | 1.64 |
| Sn <sub>0.98</sub> In <sub>0.02</sub> Se             | 523  | 0.63 |  | Sn <sub>0.91</sub> Mn <sub>0.09</sub> Te <sub>0.99</sub> I <sub>0.01</sub> | 891 | 1.6  |
| Sn <sub>0.98</sub> In <sub>0.02</sub> Se             | 573  | 0.62 |  | (SnTe) <sub>0.84</sub> (CuSbTe <sub>2</sub> ) <sub>0.16</sub>              | 325 | 3.94 |
| Sn <sub>0.98</sub> In <sub>0.02</sub> Se             | 623  | 0.62 |  | (SnTe) <sub>0.84</sub> (CuSbTe <sub>2</sub> ) <sub>0.16</sub>              | 432 | 3.79 |
| Sn <sub>0.98</sub> In <sub>0.02</sub> Se             | 673  | 0.63 |  | (SnTe) <sub>0.84</sub> (CuSbTe <sub>2</sub> ) <sub>0.16</sub>              | 529 | 3.06 |
| Sn <sub>0.98</sub> In <sub>0.02</sub> Se             | 723  | 0.64 |  | (SnTe) <sub>0.84</sub> (CuSbTe <sub>2</sub> ) <sub>0.16</sub>              | 625 | 2.46 |
| Sn <sub>0.98</sub> In <sub>0.02</sub> Se             | 773  | 0.67 |  | (SnTe) <sub>0.84</sub> (CuSbTe <sub>2</sub> ) <sub>0.16</sub>              | 719 | 2.09 |

|                                          |     |      |  |                                                               |     |      |
|------------------------------------------|-----|------|--|---------------------------------------------------------------|-----|------|
| Sn <sub>0.97</sub> Ce <sub>0.03</sub> Te | 323 | 4.18 |  | (SnTe) <sub>0.84</sub> (CuSbTe <sub>2</sub> ) <sub>0.16</sub> | 818 | 1.71 |
| Sn <sub>0.97</sub> Ce <sub>0.03</sub> Te | 423 | 3.5  |  | (SnTe) <sub>0.86</sub> (CuSbTe <sub>2</sub> ) <sub>0.14</sub> | 324 | 3.39 |
| Sn <sub>0.97</sub> Ce <sub>0.03</sub> Te | 523 | 2.83 |  | (SnTe) <sub>0.86</sub> (CuSbTe <sub>2</sub> ) <sub>0.14</sub> | 432 | 3.16 |
| Sn <sub>0.97</sub> Ce <sub>0.03</sub> Te | 623 | 2.25 |  | (SnTe) <sub>0.86</sub> (CuSbTe <sub>2</sub> ) <sub>0.14</sub> | 524 | 2.81 |
| Sn <sub>0.97</sub> Ce <sub>0.03</sub> Te | 723 | 2    |  | (SnTe) <sub>0.86</sub> (CuSbTe <sub>2</sub> ) <sub>0.14</sub> | 625 | 2.29 |
| Sn <sub>0.98</sub> Ce <sub>0.02</sub> Te | 323 | 5    |  | (SnTe) <sub>0.86</sub> (CuSbTe <sub>2</sub> ) <sub>0.14</sub> | 723 | 2.11 |
| Sn <sub>0.98</sub> Ce <sub>0.02</sub> Te | 423 | 4.15 |  | (SnTe) <sub>0.86</sub> (CuSbTe <sub>2</sub> ) <sub>0.14</sub> | 818 | 1.83 |
| Sn <sub>0.98</sub> Ce <sub>0.02</sub> Te | 523 | 3.33 |  | (SnTe) <sub>0.88</sub> (CuSbTe <sub>2</sub> ) <sub>0.12</sub> | 323 | 3.52 |
| Sn <sub>0.98</sub> Ce <sub>0.02</sub> Te | 623 | 2.54 |  | (SnTe) <sub>0.88</sub> (CuSbTe <sub>2</sub> ) <sub>0.12</sub> | 427 | 3.21 |
| Sn <sub>0.98</sub> Ce <sub>0.02</sub> Te | 723 | 2.09 |  | (SnTe) <sub>0.88</sub> (CuSbTe <sub>2</sub> ) <sub>0.12</sub> | 525 | 2.77 |
| Sn <sub>0.99</sub> Ce <sub>0.01</sub> Te | 323 | 6.15 |  | (SnTe) <sub>0.88</sub> (CuSbTe <sub>2</sub> ) <sub>0.12</sub> | 622 | 2.24 |
| Sn <sub>0.99</sub> Ce <sub>0.01</sub> Te | 423 | 5.32 |  | (SnTe) <sub>0.88</sub> (CuSbTe <sub>2</sub> ) <sub>0.12</sub> | 726 | 2.05 |
| Sn <sub>0.99</sub> Ce <sub>0.01</sub> Te | 523 | 4.34 |  | (SnTe) <sub>0.88</sub> (CuSbTe <sub>2</sub> ) <sub>0.12</sub> | 818 | 1.78 |
| Sn <sub>0.99</sub> Ce <sub>0.01</sub> Te | 623 | 3.35 |  | (SnTe) <sub>0.92</sub> (CuSbTe <sub>2</sub> ) <sub>0.08</sub> | 323 | 3.93 |
| Sn <sub>0.99</sub> Ce <sub>0.01</sub> Te | 723 | 2.6  |  | (SnTe) <sub>0.92</sub> (CuSbTe <sub>2</sub> ) <sub>0.08</sub> | 430 | 3.79 |
| Ag <sub>0.01</sub> Sn <sub>0.99</sub> Se | 322 | 0.53 |  | (SnTe) <sub>0.92</sub> (CuSbTe <sub>2</sub> ) <sub>0.08</sub> | 526 | 3.04 |
| Ag <sub>0.01</sub> Sn <sub>0.99</sub> Se | 418 | 0.41 |  | (SnTe) <sub>0.92</sub> (CuSbTe <sub>2</sub> ) <sub>0.08</sub> | 620 | 2.45 |
| Ag <sub>0.01</sub> Sn <sub>0.99</sub> Se | 518 | 0.29 |  | (SnTe) <sub>0.92</sub> (CuSbTe <sub>2</sub> ) <sub>0.08</sub> | 719 | 2.09 |
| Ag <sub>0.01</sub> Sn <sub>0.99</sub> Se | 567 | 0.29 |  | (SnTe) <sub>0.92</sub> (CuSbTe <sub>2</sub> ) <sub>0.08</sub> | 818 | 1.74 |
| Ag <sub>0.01</sub> Sn <sub>0.99</sub> Se | 616 | 0.29 |  | (SnTe) <sub>0.94</sub> (CuSbTe <sub>2</sub> ) <sub>0.06</sub> | 320 | 4.43 |
| Ag <sub>0.01</sub> Sn <sub>0.99</sub> Se | 666 | 0.29 |  | (SnTe) <sub>0.94</sub> (CuSbTe <sub>2</sub> ) <sub>0.06</sub> | 427 | 4.24 |
| Ag <sub>0.01</sub> Sn <sub>0.99</sub> Se | 763 | 0.27 |  | (SnTe) <sub>0.94</sub> (CuSbTe <sub>2</sub> ) <sub>0.06</sub> | 525 | 3.81 |
| Ag <sub>0.01</sub> Sn <sub>0.99</sub> Se | 813 | 0.23 |  | (SnTe) <sub>0.94</sub> (CuSbTe <sub>2</sub> ) <sub>0.06</sub> | 621 | 3.06 |
| SnTe <sub>0.1</sub> AgSbSe <sub>2</sub>  | 300 | 2.45 |  | (SnTe) <sub>0.94</sub> (CuSbTe <sub>2</sub> ) <sub>0.06</sub> | 722 | 2.44 |
| SnTe <sub>0.1</sub> AgSbSe <sub>2</sub>  | 400 | 2.44 |  | (SnTe) <sub>0.94</sub> (CuSbTe <sub>2</sub> ) <sub>0.06</sub> | 818 | 1.95 |
| SnTe <sub>0.1</sub> AgSbSe <sub>2</sub>  | 500 | 2.29 |  | (SnTe) <sub>0.96</sub> (CuSbTe <sub>2</sub> ) <sub>0.04</sub> | 321 | 5.63 |
| SnTe <sub>0.1</sub> AgSbSe <sub>2</sub>  | 600 | 2.06 |  | (SnTe) <sub>0.96</sub> (CuSbTe <sub>2</sub> ) <sub>0.04</sub> | 430 | 5.03 |
| SnTe <sub>0.1</sub> AgSbSe <sub>2</sub>  | 650 | 1.97 |  | (SnTe) <sub>0.96</sub> (CuSbTe <sub>2</sub> ) <sub>0.04</sub> | 525 | 4.39 |
| SnTe <sub>0.1</sub> AgSbSe <sub>2</sub>  | 700 | 1.9  |  | (SnTe) <sub>0.96</sub> (CuSbTe <sub>2</sub> ) <sub>0.04</sub> | 620 | 3.45 |
| SnTe <sub>0.1</sub> AgSbSe <sub>2</sub>  | 750 | 1.88 |  | (SnTe) <sub>0.96</sub> (CuSbTe <sub>2</sub> ) <sub>0.04</sub> | 722 | 2.77 |
| SnTe <sub>0.1</sub> AgSbSe <sub>2</sub>  | 800 | 1.91 |  | (SnTe) <sub>0.96</sub> (CuSbTe <sub>2</sub> ) <sub>0.04</sub> | 818 | 2.14 |
| SnTe <sub>0.2</sub> AgSbSe <sub>2</sub>  | 300 | 1.29 |  | (SnTe) <sub>0.98</sub> (CuSbTe <sub>2</sub> ) <sub>0.02</sub> | 320 | 6.99 |

|                                                      |     |      |  |                                                                            |     |      |
|------------------------------------------------------|-----|------|--|----------------------------------------------------------------------------|-----|------|
| SnTe <sub>0.2</sub> AgSbSe <sub>2</sub>              | 400 | 1.27 |  | (SnTe) <sub>0.98</sub> (CuSbTe <sub>2</sub> ) <sub>0.02</sub>              | 427 | 6.23 |
| SnTe <sub>0.2</sub> AgSbSe <sub>2</sub>              | 500 | 1.2  |  | (SnTe) <sub>0.98</sub> (CuSbTe <sub>2</sub> ) <sub>0.02</sub>              | 524 | 5.2  |
| SnTe <sub>0.2</sub> AgSbSe <sub>2</sub>              | 600 | 1.09 |  | (SnTe) <sub>0.98</sub> (CuSbTe <sub>2</sub> ) <sub>0.02</sub>              | 625 | 4.02 |
| SnTe <sub>0.2</sub> AgSbSe <sub>2</sub>              | 650 | 1.08 |  | (SnTe) <sub>0.98</sub> (CuSbTe <sub>2</sub> ) <sub>0.02</sub>              | 722 | 3.09 |
| SnTe <sub>0.2</sub> AgSbSe <sub>2</sub>              | 800 | 1.21 |  | (SnTe) <sub>0.98</sub> (CuSbTe <sub>2</sub> ) <sub>0.02</sub>              | 818 | 2.61 |
| NbCoSn <sub>0.9</sub> Sb <sub>0.1</sub>              | 338 | 6.71 |  | Bi <sub>0.84</sub> Pb <sub>0.08</sub> Yb <sub>0.08</sub> CuSeO             | 347 | 0.73 |
| NbCoSn <sub>0.9</sub> Sb <sub>0.1</sub>              | 430 | 6.18 |  | Bi <sub>0.84</sub> Pb <sub>0.08</sub> Yb <sub>0.08</sub> CuSeO             | 446 | 0.66 |
| NbCoSn <sub>0.9</sub> Sb <sub>0.1</sub>              | 530 | 5.79 |  | Bi <sub>0.84</sub> Pb <sub>0.08</sub> Yb <sub>0.08</sub> CuSeO             | 543 | 0.58 |
| NbCoSn <sub>0.9</sub> Sb <sub>0.1</sub>              | 628 | 5.4  |  | Bi <sub>0.84</sub> Pb <sub>0.08</sub> Yb <sub>0.08</sub> CuSeO             | 640 | 0.52 |
| NbCoSn <sub>0.9</sub> Sb <sub>0.1</sub>              | 728 | 5.06 |  | Bi <sub>0.84</sub> Pb <sub>0.08</sub> Yb <sub>0.08</sub> CuSeO             | 741 | 0.47 |
| NbCoSn <sub>0.9</sub> Sb <sub>0.1</sub>              | 826 | 4.77 |  | Bi <sub>0.84</sub> Pb <sub>0.08</sub> Yb <sub>0.08</sub> CuSeO             | 847 | 0.45 |
| NbCoSn <sub>0.9</sub> Sb <sub>0.1</sub>              | 924 | 4.53 |  | Bi <sub>0.88</sub> Pb <sub>0.06</sub> Yb <sub>0.06</sub> CuSeO             | 347 | 0.65 |
| (SnTe) <sub>10</sub> Sb <sub>2</sub> Te <sub>3</sub> | 323 | 2.37 |  | Bi <sub>0.88</sub> Pb <sub>0.06</sub> Yb <sub>0.06</sub> CuSeO             | 446 | 0.57 |
| (SnTe) <sub>10</sub> Sb <sub>2</sub> Te <sub>3</sub> | 423 | 2.19 |  | Bi <sub>0.88</sub> Pb <sub>0.06</sub> Yb <sub>0.06</sub> CuSeO             | 543 | 0.52 |
| (SnTe) <sub>10</sub> Sb <sub>2</sub> Te <sub>3</sub> | 523 | 1.9  |  | Bi <sub>0.88</sub> Pb <sub>0.06</sub> Yb <sub>0.06</sub> CuSeO             | 640 | 0.48 |
| (SnTe) <sub>10</sub> Sb <sub>2</sub> Te <sub>3</sub> | 623 | 1.67 |  | Bi <sub>0.88</sub> Pb <sub>0.06</sub> Yb <sub>0.06</sub> CuSeO             | 741 | 0.43 |
| (SnTe) <sub>10</sub> Sb <sub>2</sub> Te <sub>3</sub> | 673 | 1.62 |  | Bi <sub>0.88</sub> Pb <sub>0.06</sub> Yb <sub>0.06</sub> CuSeO             | 850 | 0.41 |
| (SnTe) <sub>10</sub> Sb <sub>2</sub> Te <sub>3</sub> | 723 | 1.66 |  | Bi <sub>0.92</sub> Pb <sub>0.04</sub> Yb <sub>0.04</sub> CuSeO             | 350 | 0.71 |
| (SnTe) <sub>10</sub> Sb <sub>2</sub> Te <sub>3</sub> | 773 | 1.76 |  | Bi <sub>0.92</sub> Pb <sub>0.04</sub> Yb <sub>0.04</sub> CuSeO             | 450 | 0.64 |
| (SnTe) <sub>12</sub> Sb <sub>2</sub> Te <sub>3</sub> | 323 | 2.91 |  | Bi <sub>0.92</sub> Pb <sub>0.04</sub> Yb <sub>0.04</sub> CuSeO             | 548 | 0.57 |
| (SnTe) <sub>12</sub> Sb <sub>2</sub> Te <sub>3</sub> | 423 | 2.7  |  | Bi <sub>0.92</sub> Pb <sub>0.04</sub> Yb <sub>0.04</sub> CuSeO             | 645 | 0.51 |
| (SnTe) <sub>12</sub> Sb <sub>2</sub> Te <sub>3</sub> | 523 | 2.33 |  | Bi <sub>0.92</sub> Pb <sub>0.04</sub> Yb <sub>0.04</sub> CuSeO             | 747 | 0.45 |
| (SnTe) <sub>12</sub> Sb <sub>2</sub> Te <sub>3</sub> | 623 | 2    |  | Bi <sub>0.92</sub> Pb <sub>0.04</sub> Yb <sub>0.04</sub> CuSeO             | 847 | 0.43 |
| (SnTe) <sub>12</sub> Sb <sub>2</sub> Te <sub>3</sub> | 673 | 1.9  |  | Bi <sub>0.96</sub> Pb <sub>0.02</sub> Yb <sub>0.02</sub> CuSeO             | 343 | 0.8  |
| (SnTe) <sub>12</sub> Sb <sub>2</sub> Te <sub>3</sub> | 723 | 1.88 |  | Bi <sub>0.96</sub> Pb <sub>0.02</sub> Yb <sub>0.02</sub> CuSeO             | 446 | 0.74 |
| (SnTe) <sub>12</sub> Sb <sub>2</sub> Te <sub>3</sub> | 773 | 1.95 |  | Bi <sub>0.96</sub> Pb <sub>0.02</sub> Yb <sub>0.02</sub> CuSeO             | 543 | 0.66 |
| (SnTe) <sub>15</sub> Sb <sub>2</sub> Te <sub>3</sub> | 323 | 3.54 |  | Bi <sub>0.96</sub> Pb <sub>0.02</sub> Yb <sub>0.02</sub> CuSeO             | 640 | 0.58 |
| (SnTe) <sub>15</sub> Sb <sub>2</sub> Te <sub>3</sub> | 423 | 3.3  |  | Bi <sub>0.96</sub> Pb <sub>0.02</sub> Yb <sub>0.02</sub> CuSeO             | 747 | 0.52 |
| (SnTe) <sub>15</sub> Sb <sub>2</sub> Te <sub>3</sub> | 523 | 2.88 |  | Bi <sub>0.96</sub> Pb <sub>0.02</sub> Yb <sub>0.02</sub> CuSeO             | 847 | 0.49 |
| (SnTe) <sub>15</sub> Sb <sub>2</sub> Te <sub>3</sub> | 623 | 2.39 |  | La(Mg <sub>0.25</sub> Al <sub>0.5</sub> Ta <sub>0.25</sub> )O <sub>3</sub> | 300 | 2.07 |
| (SnTe) <sub>15</sub> Sb <sub>2</sub> Te <sub>3</sub> | 673 | 2.18 |  | La(Mg <sub>0.25</sub> Al <sub>0.5</sub> Ta <sub>0.25</sub> )O <sub>3</sub> | 350 | 2.04 |
| (SnTe) <sub>15</sub> Sb <sub>2</sub> Te <sub>3</sub> | 723 | 2.11 |  | La(Mg <sub>0.25</sub> Al <sub>0.5</sub> Ta <sub>0.25</sub> )O <sub>3</sub> | 400 | 2.01 |

|                                                      |     |      |  |                                                                              |     |      |
|------------------------------------------------------|-----|------|--|------------------------------------------------------------------------------|-----|------|
| (SnTe) <sub>15</sub> Sb <sub>2</sub> Te <sub>3</sub> | 773 | 2.13 |  | La(Mg <sub>0.25</sub> Al <sub>0.5</sub> Ta <sub>0.25</sub> )O <sub>3</sub>   | 450 | 1.95 |
| (SnTe) <sub>20</sub> Sb <sub>2</sub> Te <sub>3</sub> | 323 | 4.24 |  | La(Mg <sub>0.25</sub> Al <sub>0.5</sub> Ta <sub>0.25</sub> )O <sub>3</sub>   | 500 | 1.87 |
| (SnTe) <sub>20</sub> Sb <sub>2</sub> Te <sub>3</sub> | 423 | 3.98 |  | La(Mg <sub>0.25</sub> Al <sub>0.5</sub> Ta <sub>0.25</sub> )O <sub>3</sub>   | 550 | 1.82 |
| (SnTe) <sub>20</sub> Sb <sub>2</sub> Te <sub>3</sub> | 523 | 3.42 |  | La(Mg <sub>0.25</sub> Al <sub>0.5</sub> Ta <sub>0.25</sub> )O <sub>3</sub>   | 600 | 1.81 |
| (SnTe) <sub>20</sub> Sb <sub>2</sub> Te <sub>3</sub> | 623 | 2.81 |  | (Sn <sub>0.8</sub> Ge <sub>0.2</sub> ) <sub>0.82</sub> Mn <sub>0.18</sub> Te | 300 | 2.13 |
| (SnTe) <sub>20</sub> Sb <sub>2</sub> Te <sub>3</sub> | 673 | 2.51 |  | (Sn <sub>0.8</sub> Ge <sub>0.2</sub> ) <sub>0.82</sub> Mn <sub>0.18</sub> Te | 673 | 1.54 |
| (SnTe) <sub>20</sub> Sb <sub>2</sub> Te <sub>3</sub> | 723 | 2.37 |  | (Sn <sub>0.8</sub> Ge <sub>0.2</sub> ) <sub>0.82</sub> Mn <sub>0.18</sub> Te | 773 | 1.54 |
| (SnTe) <sub>20</sub> Sb <sub>2</sub> Te <sub>3</sub> | 773 | 2.31 |  | (Sn <sub>0.8</sub> Ge <sub>0.2</sub> ) <sub>0.82</sub> Mn <sub>0.18</sub> Te | 873 | 1.51 |
| (SnTe) <sub>25</sub> Sb <sub>2</sub> Te <sub>3</sub> | 323 | 4.28 |  | (Sn <sub>0.8</sub> Ge <sub>0.2</sub> ) <sub>0.85</sub> Mn <sub>0.15</sub> Te | 373 | 1.98 |
| (SnTe) <sub>25</sub> Sb <sub>2</sub> Te <sub>3</sub> | 423 | 4    |  | (Sn <sub>0.8</sub> Ge <sub>0.2</sub> ) <sub>0.85</sub> Mn <sub>0.15</sub> Te | 473 | 1.73 |
| (SnTe) <sub>25</sub> Sb <sub>2</sub> Te <sub>3</sub> | 523 | 3.46 |  | (Sn <sub>0.8</sub> Ge <sub>0.2</sub> ) <sub>0.85</sub> Mn <sub>0.15</sub> Te | 573 | 1.64 |
| (SnTe) <sub>25</sub> Sb <sub>2</sub> Te <sub>3</sub> | 623 | 2.81 |  | (Sn <sub>0.8</sub> Ge <sub>0.2</sub> ) <sub>0.85</sub> Mn <sub>0.15</sub> Te | 673 | 1.55 |
| (SnTe) <sub>25</sub> Sb <sub>2</sub> Te <sub>3</sub> | 673 | 2.54 |  | (Sn <sub>0.8</sub> Ge <sub>0.2</sub> ) <sub>0.85</sub> Mn <sub>0.15</sub> Te | 773 | 1.41 |
| (SnTe) <sub>25</sub> Sb <sub>2</sub> Te <sub>3</sub> | 723 | 2.31 |  | (Sn <sub>0.8</sub> Ge <sub>0.2</sub> ) <sub>0.85</sub> Mn <sub>0.15</sub> Te | 873 | 1.38 |
| (SnTe) <sub>25</sub> Sb <sub>2</sub> Te <sub>3</sub> | 773 | 2.17 |  | (Sn <sub>0.8</sub> Ge <sub>0.2</sub> ) <sub>0.88</sub> Mn <sub>0.12</sub> Te | 298 | 2.56 |
| (SnTe) <sub>40</sub> Sb <sub>2</sub> Te <sub>3</sub> | 323 | 5.53 |  | (Sn <sub>0.8</sub> Ge <sub>0.2</sub> ) <sub>0.88</sub> Mn <sub>0.12</sub> Te | 373 | 2.49 |
| (SnTe) <sub>40</sub> Sb <sub>2</sub> Te <sub>3</sub> | 423 | 5.09 |  | (Sn <sub>0.8</sub> Ge <sub>0.2</sub> ) <sub>0.88</sub> Mn <sub>0.12</sub> Te | 473 | 2.06 |
| (SnTe) <sub>40</sub> Sb <sub>2</sub> Te <sub>3</sub> | 523 | 4.39 |  | (Sn <sub>0.8</sub> Ge <sub>0.2</sub> ) <sub>0.88</sub> Mn <sub>0.12</sub> Te | 573 | 1.95 |
| (SnTe) <sub>40</sub> Sb <sub>2</sub> Te <sub>3</sub> | 623 | 3.56 |  | (Sn <sub>0.8</sub> Ge <sub>0.2</sub> ) <sub>0.88</sub> Mn <sub>0.12</sub> Te | 673 | 1.83 |
| (SnTe) <sub>40</sub> Sb <sub>2</sub> Te <sub>3</sub> | 673 | 3.16 |  | (Sn <sub>0.8</sub> Ge <sub>0.2</sub> ) <sub>0.88</sub> Mn <sub>0.12</sub> Te | 773 | 1.74 |
| (SnTe) <sub>40</sub> Sb <sub>2</sub> Te <sub>3</sub> | 723 | 2.8  |  | (Sn <sub>0.8</sub> Ge <sub>0.2</sub> ) <sub>0.88</sub> Mn <sub>0.12</sub> Te | 873 | 1.68 |
| (SnTe) <sub>40</sub> Sb <sub>2</sub> Te <sub>3</sub> | 773 | 2.59 |  | (Sn <sub>0.8</sub> Ge <sub>0.2</sub> ) <sub>0.91</sub> Mn <sub>0.09</sub> Te | 373 | 2.53 |
| Sn <sub>0.91</sub> Mn <sub>0.09</sub> Te             | 331 | 3.93 |  | (Sn <sub>0.8</sub> Ge <sub>0.2</sub> ) <sub>0.91</sub> Mn <sub>0.09</sub> Te | 473 | 2.21 |
| Sn <sub>0.91</sub> Mn <sub>0.09</sub> Te             | 424 | 3.67 |  | (Sn <sub>0.8</sub> Ge <sub>0.2</sub> ) <sub>0.91</sub> Mn <sub>0.09</sub> Te | 573 | 2.11 |
| Sn <sub>0.91</sub> Mn <sub>0.09</sub> Te             | 524 | 3.29 |  | (Sn <sub>0.8</sub> Ge <sub>0.2</sub> ) <sub>0.91</sub> Mn <sub>0.09</sub> Te | 773 | 1.94 |
| Sn <sub>0.91</sub> Mn <sub>0.09</sub> Te             | 622 | 3    |  | (Sn <sub>0.8</sub> Ge <sub>0.2</sub> ) <sub>0.94</sub> Mn <sub>0.06</sub> Te | 373 | 2.88 |
| Sn <sub>0.91</sub> Mn <sub>0.09</sub> Te             | 720 | 2.58 |  | (Sn <sub>0.8</sub> Ge <sub>0.2</sub> ) <sub>0.94</sub> Mn <sub>0.06</sub> Te | 473 | 2.58 |
| Sn <sub>0.91</sub> Mn <sub>0.09</sub> Te             | 769 | 2.38 |  | (Sn <sub>0.8</sub> Ge <sub>0.2</sub> ) <sub>0.94</sub> Mn <sub>0.06</sub> Te | 573 | 2.46 |
| Sn <sub>0.95</sub> Mn <sub>0.05</sub> Te             | 332 | 5.66 |  | (Sn <sub>0.8</sub> Ge <sub>0.2</sub> ) <sub>0.94</sub> Mn <sub>0.06</sub> Te | 673 | 2.21 |
| Sn <sub>0.95</sub> Mn <sub>0.05</sub> Te             | 424 | 5.32 |  | (Sn <sub>0.8</sub> Ge <sub>0.2</sub> ) <sub>0.94</sub> Mn <sub>0.06</sub> Te | 773 | 2.05 |
| Sn <sub>0.95</sub> Mn <sub>0.05</sub> Te             | 524 | 4.75 |  | (Sn <sub>0.8</sub> Ge <sub>0.2</sub> ) <sub>0.94</sub> Mn <sub>0.06</sub> Te | 873 | 1.88 |
| Sn <sub>0.95</sub> Mn <sub>0.05</sub> Te             | 622 | 4.11 |  | (Sn <sub>0.8</sub> Ge <sub>0.2</sub> ) <sub>0.97</sub> Mn <sub>0.03</sub> Te | 573 | 2.98 |

|                |      |      |  |                          |     |       |
|----------------|------|------|--|--------------------------|-----|-------|
| Sn0.95Mn0.05Te | 720  | 3.46 |  | (Sn0.8Ge0.2)0.97Mn0.03Te | 673 | 2.679 |
| Sn0.95Mn0.05Te | 769  | 3.17 |  | (Sn0.8Ge0.2)0.97Mn0.03Te | 773 | 2.36  |
| Sn0.97Mn0.03Te | 331  | 6.34 |  | (Sn0.8Ge0.2)0.97Mn0.03Te | 873 | 2.04  |
| Sn0.97Mn0.03Te | 426  | 5.8  |  | LaCo0.5(Ni0.5Fe0.5)0.5O3 | 300 | 0.07  |
| Sn0.97Mn0.03Te | 527  | 5.03 |  | LaCo0.8(Ni0.5Fe0.5)0.2O3 | 300 | 0.16  |
| Sn0.97Mn0.03Te | 625  | 4.22 |  | LaCo0.9(Ni0.5Fe0.5)0.1O3 | 300 | 0.48  |
| Sn0.97Mn0.03Te | 723  | 3.42 |  | Ba8Ga15.88Zn0.007Sn30.12 | 300 | 1     |
| Sn0.97Mn0.03Te | 772  | 3.05 |  | Ba8Ga15.88Zn0.007Sn30.12 | 340 | 0.94  |
| Sn0.99Mn0.01Te | 332  | 8.46 |  | Ba8Ga15.88Zn0.007Sn30.12 | 380 | 0.91  |
| Sn0.99Mn0.01Te | 424  | 7.51 |  | Ba8Ga15.88Zn0.007Sn30.12 | 580 | 1.25  |
| Sn0.99Mn0.01Te | 524  | 6.34 |  | Ba8Ga15.88Zn0.007Sn30.12 | 420 | 0.89  |
| Sn0.99Mn0.01Te | 621  | 5.18 |  | Ba8Ga15.88Zn0.007Sn30.12 | 540 | 1.03  |
| Sn0.99Mn0.01Te | 719  | 4.11 |  | Ba8Ga15.88Zn0.007Sn30.12 | 460 | 0.89  |
| Sn0.99Mn0.01Te | 768  | 3.62 |  | Ba8Ga15.88Zn0.007Sn30.12 | 500 | 0.92  |
| Ti0.95Al0.05O2 | 296  | 5.67 |  | Nb0.75Ta0.25CoSn0.9Sb0.1 | 338 | 4.6   |
| Ti0.96Al0.04O2 | 296  | 5.72 |  | Nb0.75Ta0.25CoSn0.9Sb0.1 | 430 | 4.49  |
| Ti0.97Al0.03O2 | 296  | 5.81 |  | Nb0.75Ta0.25CoSn0.9Sb0.1 | 530 | 4.35  |
| Ti0.98Al0.02O2 | 296  | 5.88 |  | Nb0.75Ta0.25CoSn0.9Sb0.1 | 628 | 4.19  |
| Ti0.99Al0.01O2 | 296  | 6.24 |  | Nb0.75Ta0.25CoSn0.9Sb0.1 | 728 | 3.91  |
| Ti0.8Co4SnSb11 | 50   | 2.28 |  | Nb0.75Ta0.25CoSn0.9Sb0.1 | 826 | 3.72  |
| Ti0.8Co4SnSb11 | 100  | 2.58 |  | Nb0.75Ta0.25CoSn0.9Sb0.1 | 924 | 3.56  |
| Ti0.8Co4SnSb11 | 150  | 2.22 |  | Nb0.85Ta0.15CoSn0.9Sb0.1 | 338 | 4.98  |
| Ti0.8Co4SnSb11 | 200  | 2.24 |  | Nb0.85Ta0.15CoSn0.9Sb0.1 | 430 | 4.8   |
| Ti0.8Co4SnSb11 | 250  | 2.26 |  | Nb0.85Ta0.15CoSn0.9Sb0.1 | 530 | 4.7   |
| NbCo0.9Ni0.1Sn | 382  | 9.26 |  | Nb0.85Ta0.15CoSn0.9Sb0.1 | 628 | 4.43  |
| NbCo0.9Ni0.1Sn | 492  | 8.1  |  | Nb0.85Ta0.15CoSn0.9Sb0.1 | 728 | 4.26  |
| NbCo0.9Ni0.1Sn | 600  | 7.27 |  | Nb0.85Ta0.15CoSn0.9Sb0.1 | 826 | 4.12  |
| NbCo0.9Ni0.1Sn | 703  | 6.69 |  | Nb0.85Ta0.15CoSn0.9Sb0.1 | 924 | 3.96  |
| NbCo0.9Ni0.1Sn | 803  | 6.19 |  | Nb0.95Ta0.05CoSn0.9Sb0.1 | 338 | 5.56  |
| NbCo0.9Ni0.1Sn | 902  | 5.83 |  | Nb0.95Ta0.05CoSn0.9Sb0.1 | 430 | 5.25  |
| NbCo0.9Ni0.1Sn | 1001 | 5.5  |  | Nb0.95Ta0.05CoSn0.9Sb0.1 | 530 | 4.96  |
| Ba0.9Sr0.1ZrO3 | 300  | 1.21 |  | Nb0.95Ta0.05CoSn0.9Sb0.1 | 628 | 4.77  |

|                |     |       |  |                           |      |      |
|----------------|-----|-------|--|---------------------------|------|------|
| Ba0.8Sr0.2ZrO3 | 300 | 0.81  |  | Nb0.95Ta0.05CoSn0.9Sb0.1  | 728  | 4.55 |
| Ba0.7Sr0.3ZrO3 | 300 | 0.63  |  | Nb0.95Ta0.05CoSn0.9Sb0.1  | 826  | 4.34 |
| Ba0.6Sr0.4ZrO3 | 300 | 0.58  |  | Nb0.95Ta0.05CoSn0.9Sb0.1  | 924  | 4.24 |
| Ba0.9Ca0.1ZrO3 | 300 | 0.89  |  | Sn1.03Se0.12Te0.87Br0.01  | 323  | 4.61 |
| Ba0.8Ca0.2ZrO3 | 300 | 0.83  |  | Sn1.03Se0.12Te0.87Br0.01  | 423  | 3.92 |
| Ba0.7Ca0.3ZrO3 | 300 | 0.86  |  | Sn1.03Se0.12Te0.87Br0.01  | 523  | 3.2  |
| Ba0.6Ca0.4ZrO3 | 300 | 0.85  |  | Sn1.03Se0.12Te0.87Br0.01  | 623  | 2.51 |
| BaZr0.9Ti0.1O3 | 300 | 0.846 |  | Sn1.03Se0.12Te0.87Br0.01  | 723  | 2.11 |
| BaZr0.8Ti0.2O3 | 300 | 0.937 |  | Sn1.03Se0.12Te0.87Br0.01  | 823  | 2.17 |
| BaZr0.7Ti0.3O3 | 300 | 0.58  |  | Zn0.1Ca0.1Sr0.4Ba0.4ZrO3  | 290  | 1.44 |
| BaZr0.6Ti0.4O3 | 300 | 0.49  |  | Zn0.1Ca0.1Sr0.4Ba0.4ZrO3  | 373  | 1.53 |
| BaZr0.9Ce0.1O3 | 300 | 0.88  |  | Zn0.1Ca0.1Sr0.4Ba0.4ZrO3  | 473  | 1.53 |
| BaZr0.8Ce0.2O3 | 300 | 1.04  |  | Zn0.1Ca0.1Sr0.4Ba0.4ZrO3  | 573  | 1.56 |
| BaZr0.7Ce0.3O3 | 300 | 0.42  |  | Zn0.1Ca0.1Sr0.4Ba0.4ZrO3  | 673  | 1.6  |
| BaZr0.6Ce0.4O3 | 300 | 0.34  |  | Pr1.8Sr0.2CoFe0.9Ni0.1O6  | 323  | 0.88 |
| Ca0.8Sr0.2ZrO3 | 290 | 3.22  |  | Pr1.8Sr0.2CoFe0.9Ni0.1O6  | 373  | 0.91 |
| Ca0.8Sr0.2ZrO3 | 370 | 2.86  |  | Pr1.8Sr0.2CoFe0.9Ni0.1O6  | 473  | 0.81 |
| Ca0.8Sr0.2ZrO3 | 470 | 2.6   |  | Pr1.8Sr0.2CoFe0.9Ni0.1O6  | 573  | 0.83 |
| Ca0.8Sr0.2ZrO3 | 570 | 2.48  |  | Pr1.8Sr0.2CoFe0.9Ni0.1O6  | 673  | 0.85 |
| Ca0.8Sr0.2ZrO3 | 670 | 2.32  |  | Zn0.875Cd0.125Sc0.02O1.03 | 300  | 6.75 |
| Ca0.6Sr0.4ZrO3 | 290 | 3.17  |  | Zn0.875Cd0.125Sc0.02O1.03 | 373  | 5.67 |
| Ca0.6Sr0.4ZrO3 | 370 | 2.82  |  | Zn0.875Cd0.125Sc0.02O1.03 | 473  | 5.08 |
| Ca0.6Sr0.4ZrO3 | 470 | 2.64  |  | Zn0.875Cd0.125Sc0.02O1.03 | 573  | 4.25 |
| Ca0.6Sr0.4ZrO3 | 570 | 2.46  |  | Zn0.875Cd0.125Sc0.02O1.03 | 673  | 3.83 |
| Ca0.6Sr0.4ZrO3 | 670 | 2.29  |  | Zn0.875Cd0.125Sc0.02O1.03 | 773  | 3.58 |
| Ca0.4Sr0.6ZrO3 | 290 | 3.02  |  | Zn0.875Cd0.125Sc0.02O1.03 | 873  | 3.3  |
| Ca0.4Sr0.6ZrO3 | 370 | 2.71  |  | Zn0.875Cd0.125Sc0.02O1.03 | 973  | 3    |
| Ca0.4Sr0.6ZrO3 | 470 | 2.49  |  | Zn0.875Cd0.125Sc0.02O1.03 | 1073 | 2.85 |
| Ca0.4Sr0.6ZrO3 | 570 | 2.34  |  | Zn0.875Cd0.125Sc0.02O1.03 | 1173 | 2.58 |
| Ca0.4Sr0.6ZrO3 | 670 | 2.81  |  | Cu5.133Sn1.866S6.65Cl0.35 | 300  | 2.33 |
| Ca0.2Sr0.8ZrO3 | 290 | 3     |  | Cu5.133Sn1.866S6.65Cl0.35 | 415  | 1.94 |
| Ca0.2Sr0.8ZrO3 | 370 | 2.77  |  | Cu5.133Sn1.866S6.65Cl0.35 | 515  | 1.69 |

|                 |      |       |  |                            |     |      |
|-----------------|------|-------|--|----------------------------|-----|------|
| Ca0.2Sr0.8ZrO3  | 470  | 2.47  |  | Cu5.133Sn1.866S6.65Cl0.35  | 617 | 1.5  |
| Ca0.2Sr0.8ZrO3  | 570  | 2.32  |  | Cu5.133Sn1.866S6.65Cl0.35  | 667 | 1.44 |
| Ca0.2Sr0.8ZrO3  | 670  | 2.22  |  | (Cu3SnS4)0.85(Ga2Te3)0.15  | 331 | 1.78 |
| La0.8Sr0.2CoO3  | 325  | 1.66  |  | (Cu3SnS4)0.85(Ga2Te3)0.15  | 429 | 1.63 |
| La0.8Sr0.2CoO3  | 375  | 1.71  |  | (Cu3SnS4)0.85(Ga2Te3)0.15  | 527 | 1.43 |
| La0.8Sr0.2CoO3  | 425  | 1.73  |  | (Cu3SnS4)0.85(Ga2Te3)0.15  | 624 | 1.24 |
| La0.8Sr0.2CoO3  | 475  | 1.75  |  | (Cu3SnS4)0.85(Ga2Te3)0.15  | 674 | 1.2  |
| La0.8Sr0.2CoO3  | 525  | 1.73  |  | (Cu3SnS4)0.85(Ga2Te3)0.15  | 741 | 1.04 |
| La0.8Sr0.2CoO3  | 575  | 1.72  |  | (Cu3SnS4)0.85(Ga2Te3)0.15  | 800 | 0.72 |
| La0.8Sr0.2CoO3  | 625  | 1.72  |  | In4Pb0.01Sn0.03Se2.9Cl0.02 | 323 | 0.95 |
| Ba0.8Sr0.2TiO3  | 300  | 4.84  |  | In4Pb0.01Sn0.03Se2.9Cl0.02 | 373 | 0.85 |
| Ba0.7Sr0.3TiO3  | 300  | 6.98  |  | In4Pb0.01Sn0.03Se2.9Cl0.02 | 473 | 0.74 |
| Pr0.5Sr0.5MnO3  | 100  | 1.74  |  | In4Pb0.01Sn0.03Se2.9Cl0.02 | 523 | 0.69 |
| Pr0.5Sr0.5MnO3  | 200  | 2.74  |  | In4Pb0.01Sn0.03Se2.9Cl0.02 | 623 | 0.59 |
| Pr0.5Sr0.5MnO3  | 300  | 2.26  |  | In4Pb0.01Sn0.03Se2.9Cl0.02 | 673 | 0.57 |
| La0.7Ag0.3MnO3  | 300  | 12.85 |  | In4Pb0.01Sn0.03Se2.9Cl0.02 | 723 | 0.56 |
| Cu2.1Cd0.9SnSe4 | 300  | 2.05  |  | In4Pb0.01Sn0.03Se2.9Cl0.04 | 323 | 0.91 |
| Cu2.1Cd0.9SnSe4 | 350  | 1.71  |  | In4Pb0.01Sn0.03Se2.9Cl0.04 | 623 | 0.58 |
| Cu2.1Cd0.9SnSe4 | 400  | 1.45  |  | In4Pb0.01Sn0.03Se2.9Cl0.04 | 673 | 0.55 |
| Cu2.1Cd0.9SnSe4 | 450  | 1.22  |  | In4Pb0.01Sn0.03Se2.9Cl0.04 | 723 | 0.54 |
| Cu2.1Cd0.9SnSe4 | 500  | 1.01  |  | In4Pb0.01Sn0.03Se2.9Cl0.06 | 323 | 0.94 |
| Cu2.1Cd0.9SnSe4 | 550  | 0.83  |  | In4Pb0.01Sn0.03Se2.9Cl0.06 | 373 | 0.84 |
| Cu2.1Cd0.9SnSe4 | 600  | 0.72  |  | In4Pb0.01Sn0.03Se2.9Cl0.06 | 423 | 0.77 |
| Cu2.1Cd0.9SnSe4 | 650  | 0.6   |  | In4Pb0.01Sn0.03Se2.9Cl0.06 | 523 | 0.67 |
| Cu2.1Cd0.9SnSe4 | 700  | 0.5   |  | In4Pb0.01Sn0.03Se2.9Cl0.06 | 473 | 0.72 |
| Ca3Co3.7Ti0.3O9 | 300  | 2.3   |  | In4Pb0.01Sn0.03Se2.9Cl0.06 | 573 | 0.61 |
| Ca3Co3.7Ti0.3O9 | 500  | 2.17  |  | In4Pb0.01Sn0.03Se2.9Cl0.06 | 623 | 0.57 |
| Ca3Co3.7Ti0.3O9 | 700  | 2.01  |  | In4Pb0.01Sn0.03Se2.9Cl0.06 | 673 | 0.54 |
| Ca3Co3.7Ti0.3O9 | 900  | 1.89  |  | In4Pb0.01Sn0.03Se2.9Cl0.06 | 723 | 0.53 |
| Ca3Co3.7Ti0.3O9 | 1000 | 1.79  |  | Ba8.01Ga15.89Zn0.006Sn30.1 | 300 | 0.99 |
| Ca3Co3.8Ti0.2O9 | 300  | 2.49  |  | Ba8.01Ga15.89Zn0.006Sn30.1 | 340 | 0.93 |
| Ca3Co3.8Ti0.2O9 | 500  | 2.31  |  | Ba8.01Ga15.89Zn0.006Sn30.1 | 380 | 0.9  |

|                                                                    |      |      |  |                                                                               |     |      |
|--------------------------------------------------------------------|------|------|--|-------------------------------------------------------------------------------|-----|------|
| Ca <sub>3</sub> Co <sub>3.8</sub> Ti <sub>0.2</sub> O <sub>9</sub> | 700  | 2.11 |  | Ba <sub>8.01</sub> Ga <sub>15.89</sub> Zn <sub>0.006</sub> Sn <sub>30.1</sub> | 580 | 1.25 |
| Ca <sub>3</sub> Co <sub>3.8</sub> Ti <sub>0.2</sub> O <sub>9</sub> | 900  | 1.99 |  | Ba <sub>8.01</sub> Ga <sub>15.89</sub> Zn <sub>0.006</sub> Sn <sub>30.1</sub> | 420 | 0.88 |
| Ca <sub>3</sub> Co <sub>3.8</sub> Ti <sub>0.2</sub> O <sub>9</sub> | 1000 | 1.92 |  | Ba <sub>8.01</sub> Ga <sub>15.89</sub> Zn <sub>0.006</sub> Sn <sub>30.1</sub> | 460 | 0.87 |
| Ca <sub>3</sub> Co <sub>3.9</sub> Ti <sub>0.1</sub> O <sub>9</sub> | 300  | 2.59 |  | Ba <sub>8.01</sub> Ga <sub>15.89</sub> Zn <sub>0.006</sub> Sn <sub>30.1</sub> | 540 | 1.02 |
| Ca <sub>3</sub> Co <sub>3.9</sub> Ti <sub>0.1</sub> O <sub>9</sub> | 500  | 2.43 |  | Ba <sub>8.01</sub> Ga <sub>15.89</sub> Zn <sub>0.006</sub> Sn <sub>30.1</sub> | 500 | 0.91 |
| Ca <sub>3</sub> Co <sub>3.9</sub> Ti <sub>0.1</sub> O <sub>9</sub> | 700  | 2.26 |  | Ti <sub>0.95</sub> Mn <sub>0.05</sub> Ni <sub>0.95</sub> Sb <sub>0.05</sub>   | 297 | 6.7  |
| Ca <sub>3</sub> Co <sub>3.9</sub> Ti <sub>0.1</sub> O <sub>9</sub> | 900  | 2.12 |  | Ti <sub>0.95</sub> Mn <sub>0.05</sub> Ni <sub>0.95</sub> Sb <sub>0.05</sub>   | 398 | 6.33 |
| Ca <sub>3</sub> Co <sub>3.9</sub> Ti <sub>0.1</sub> O <sub>9</sub> | 1000 | 2.03 |  | Ti <sub>0.95</sub> Mn <sub>0.05</sub> Ni <sub>0.95</sub> Sb <sub>0.05</sub>   | 498 | 6.05 |
| Cu <sub>2</sub> Sn <sub>0.8</sub> Zn <sub>0.2</sub> S <sub>3</sub> | 323  | 2.58 |  | Ti <sub>0.95</sub> Mn <sub>0.05</sub> Ni <sub>0.95</sub> Sb <sub>0.05</sub>   | 598 | 5.86 |
| Cu <sub>2</sub> Sn <sub>0.8</sub> Zn <sub>0.2</sub> S <sub>3</sub> | 423  | 2.26 |  | Ti <sub>0.95</sub> Mn <sub>0.05</sub> Ni <sub>0.95</sub> Sb <sub>0.05</sub>   | 697 | 5.64 |
| Cu <sub>2</sub> Sn <sub>0.8</sub> Zn <sub>0.2</sub> S <sub>3</sub> | 523  | 1.86 |  | Ti <sub>0.95</sub> Mn <sub>0.05</sub> Ni <sub>0.95</sub> Sb <sub>0.05</sub>   | 797 | 5.6  |
| Cu <sub>2</sub> Sn <sub>0.8</sub> Zn <sub>0.2</sub> S <sub>3</sub> | 623  | 1.55 |  | Ti <sub>0.95</sub> Mn <sub>0.05</sub> Ni <sub>0.95</sub> Sb <sub>0.05</sub>   | 871 | 5.72 |
| Cu <sub>2</sub> Sn <sub>0.8</sub> Zn <sub>0.2</sub> S <sub>3</sub> | 723  | 1.28 |  | Ti <sub>0.97</sub> Mn <sub>0.03</sub> Ni <sub>0.97</sub> Sb <sub>0.03</sub>   | 297 | 5.94 |
| Cu <sub>2</sub> Sn <sub>0.9</sub> Zn <sub>0.1</sub> S <sub>3</sub> | 323  | 1.88 |  | Ti <sub>0.97</sub> Mn <sub>0.03</sub> Ni <sub>0.97</sub> Sb <sub>0.03</sub>   | 398 | 5.63 |
| Cu <sub>2</sub> Sn <sub>0.9</sub> Zn <sub>0.1</sub> S <sub>3</sub> | 423  | 1.59 |  | Ti <sub>0.97</sub> Mn <sub>0.03</sub> Ni <sub>0.97</sub> Sb <sub>0.03</sub>   | 498 | 5.46 |
| Cu <sub>2</sub> Sn <sub>0.9</sub> Zn <sub>0.1</sub> S <sub>3</sub> | 523  | 1.37 |  | Ti <sub>0.97</sub> Mn <sub>0.03</sub> Ni <sub>0.97</sub> Sb <sub>0.03</sub>   | 598 | 5.4  |
| Cu <sub>2</sub> Sn <sub>0.9</sub> Zn <sub>0.1</sub> S <sub>3</sub> | 623  | 1.16 |  | Ti <sub>0.97</sub> Mn <sub>0.03</sub> Ni <sub>0.97</sub> Sb <sub>0.03</sub>   | 697 | 5.4  |
| Cu <sub>2</sub> Sn <sub>0.9</sub> Zn <sub>0.1</sub> S <sub>3</sub> | 723  | 0.83 |  | Ti <sub>0.97</sub> Mn <sub>0.03</sub> Ni <sub>0.97</sub> Sb <sub>0.03</sub>   | 797 | 5.48 |
| Bi <sub>0.9</sub> Ag <sub>0.1</sub> CuSeO                          | 323  | 0.56 |  | Ti <sub>0.97</sub> Mn <sub>0.03</sub> Ni <sub>0.97</sub> Sb <sub>0.03</sub>   | 871 | 5.54 |
| Bi <sub>0.9</sub> Ag <sub>0.1</sub> CuSeO                          | 373  | 0.56 |  | Ti <sub>0.98</sub> Mn <sub>0.02</sub> Ni <sub>0.98</sub> Sb <sub>0.02</sub>   | 297 | 6.13 |
| Bi <sub>0.9</sub> Ag <sub>0.1</sub> CuSeO                          | 423  | 0.55 |  | Ti <sub>0.98</sub> Mn <sub>0.02</sub> Ni <sub>0.98</sub> Sb <sub>0.02</sub>   | 398 | 5.8  |
| Bi <sub>0.9</sub> Ag <sub>0.1</sub> CuSeO                          | 473  | 0.53 |  | Ti <sub>0.98</sub> Mn <sub>0.02</sub> Ni <sub>0.98</sub> Sb <sub>0.02</sub>   | 498 | 5.6  |
| Bi <sub>0.9</sub> Ag <sub>0.1</sub> CuSeO                          | 523  | 0.52 |  | Ti <sub>0.98</sub> Mn <sub>0.02</sub> Ni <sub>0.98</sub> Sb <sub>0.02</sub>   | 598 | 5.58 |
| Bi <sub>0.9</sub> Ag <sub>0.1</sub> CuSeO                          | 573  | 0.5  |  | Ti <sub>0.98</sub> Mn <sub>0.02</sub> Ni <sub>0.98</sub> Sb <sub>0.02</sub>   | 697 | 5.56 |
| Bi <sub>0.9</sub> Ag <sub>0.1</sub> CuSeO                          | 623  | 0.5  |  | Ti <sub>0.98</sub> Mn <sub>0.02</sub> Ni <sub>0.98</sub> Sb <sub>0.02</sub>   | 797 | 5.64 |
| Bi <sub>0.9</sub> Ag <sub>0.1</sub> CuSeO                          | 673  | 0.48 |  | Ti <sub>0.98</sub> Mn <sub>0.02</sub> Ni <sub>0.98</sub> Sb <sub>0.02</sub>   | 871 | 5.85 |
| Bi <sub>0.9</sub> Ag <sub>0.1</sub> CuSeO                          | 723  | 0.46 |  | Ti <sub>0.99</sub> Mn <sub>0.01</sub> Ni <sub>0.99</sub> Sb <sub>0.01</sub>   | 297 | 6.23 |
| Bi <sub>0.9</sub> Ag <sub>0.1</sub> CuSeO                          | 773  | 0.45 |  | Ti <sub>0.99</sub> Mn <sub>0.01</sub> Ni <sub>0.99</sub> Sb <sub>0.01</sub>   | 398 | 5.83 |
| Bi <sub>0.9</sub> Ag <sub>0.1</sub> CuSeO                          | 823  | 0.44 |  | Ti <sub>0.99</sub> Mn <sub>0.01</sub> Ni <sub>0.99</sub> Sb <sub>0.01</sub>   | 498 | 5.52 |
| Bi <sub>0.9</sub> Ag <sub>0.1</sub> CuSeO                          | 873  | 0.43 |  | Ti <sub>0.99</sub> Mn <sub>0.01</sub> Ni <sub>0.99</sub> Sb <sub>0.01</sub>   | 598 | 5.46 |
| SnTe <sub>0.15</sub> AgSbSe <sub>2</sub>                           | 300  | 2.19 |  | Ti <sub>0.99</sub> Mn <sub>0.01</sub> Ni <sub>0.99</sub> Sb <sub>0.01</sub>   | 697 | 5.39 |
| SnTe <sub>0.15</sub> AgSbSe <sub>2</sub>                           | 400  | 2.16 |  | Ti <sub>0.99</sub> Mn <sub>0.01</sub> Ni <sub>0.99</sub> Sb <sub>0.01</sub>   | 797 | 5.6  |

|                                                       |     |      |  |                                                                                            |     |      |
|-------------------------------------------------------|-----|------|--|--------------------------------------------------------------------------------------------|-----|------|
| SnTe <sub>0.15</sub> AgSbSe <sub>2</sub>              | 500 | 2.01 |  | Ti <sub>0.99</sub> Mn <sub>0.01</sub> NiSn <sub>0.99</sub> Sb <sub>0.01</sub>              | 871 | 5.89 |
| SnTe <sub>0.15</sub> AgSbSe <sub>2</sub>              | 600 | 1.8  |  | Sn <sub>1.03</sub> Se <sub>0.12</sub> Te <sub>0.865</sub> Br <sub>0.015</sub>              | 323 | 4.58 |
| SnTe <sub>0.15</sub> AgSbSe <sub>2</sub>              | 650 | 1.76 |  | Sn <sub>1.03</sub> Se <sub>0.12</sub> Te <sub>0.865</sub> Br <sub>0.015</sub>              | 423 | 3.88 |
| SnTe <sub>0.15</sub> AgSbSe <sub>2</sub>              | 700 | 1.71 |  | Sn <sub>1.03</sub> Se <sub>0.12</sub> Te <sub>0.865</sub> Br <sub>0.015</sub>              | 523 | 3.1  |
| SnTe <sub>0.15</sub> AgSbSe <sub>2</sub>              | 800 | 1.72 |  | Sn <sub>1.03</sub> Se <sub>0.12</sub> Te <sub>0.865</sub> Br <sub>0.015</sub>              | 623 | 2.43 |
| SnTe <sub>0.25</sub> AgSbSe <sub>2</sub>              | 300 | 1.85 |  | Sn <sub>1.03</sub> Se <sub>0.12</sub> Te <sub>0.865</sub> Br <sub>0.015</sub>              | 723 | 2.08 |
| SnTe <sub>0.25</sub> AgSbSe <sub>2</sub>              | 400 | 1.83 |  | Sn <sub>1.03</sub> Se <sub>0.12</sub> Te <sub>0.865</sub> Br <sub>0.015</sub>              | 823 | 2.11 |
| SnTe <sub>0.25</sub> AgSbSe <sub>2</sub>              | 500 | 1.71 |  | Sn <sub>1.03</sub> Se <sub>0.12</sub> Te <sub>0.875</sub> Br <sub>0.005</sub>              | 323 | 4.96 |
| SnTe <sub>0.25</sub> AgSbSe <sub>2</sub>              | 600 | 1.61 |  | Sn <sub>1.03</sub> Se <sub>0.12</sub> Te <sub>0.875</sub> Br <sub>0.005</sub>              | 423 | 4.2  |
| SnTe <sub>0.25</sub> AgSbSe <sub>2</sub>              | 650 | 1.59 |  | Sn <sub>1.03</sub> Se <sub>0.12</sub> Te <sub>0.875</sub> Br <sub>0.005</sub>              | 523 | 3.34 |
| SnTe <sub>0.25</sub> AgSbSe <sub>2</sub>              | 700 | 1.62 |  | Sn <sub>1.03</sub> Se <sub>0.12</sub> Te <sub>0.875</sub> Br <sub>0.005</sub>              | 623 | 2.6  |
| SnTe <sub>0.25</sub> AgSbSe <sub>2</sub>              | 750 | 1.66 |  | Sn <sub>1.03</sub> Se <sub>0.12</sub> Te <sub>0.875</sub> Br <sub>0.005</sub>              | 723 | 2.18 |
| SnTe <sub>0.25</sub> AgSbSe <sub>2</sub>              | 800 | 1.74 |  | Sn <sub>1.03</sub> Se <sub>0.12</sub> Te <sub>0.875</sub> Br <sub>0.005</sub>              | 823 | 2.2  |
| Bi <sub>0.8</sub> Ba <sub>0.2</sub> CuSeO             | 319 | 0.89 |  | (Zr <sub>0.5</sub> Hf <sub>0.5</sub> ) <sub>0.87</sub> Y <sub>0.13</sub> O <sub>1.93</sub> | 373 | 1.52 |
| Bi <sub>0.8</sub> Ba <sub>0.2</sub> CuSeO             | 420 | 0.8  |  | (Zr <sub>0.5</sub> Hf <sub>0.5</sub> ) <sub>0.87</sub> Y <sub>0.13</sub> O <sub>1.93</sub> | 473 | 1.5  |
| Bi <sub>0.8</sub> Ba <sub>0.2</sub> CuSeO             | 522 | 0.74 |  | (Zr <sub>0.5</sub> Hf <sub>0.5</sub> ) <sub>0.87</sub> Y <sub>0.13</sub> O <sub>1.93</sub> | 573 | 1.5  |
| Bi <sub>0.8</sub> Ba <sub>0.2</sub> CuSeO             | 623 | 0.71 |  | (Zr <sub>0.5</sub> Hf <sub>0.5</sub> ) <sub>0.87</sub> Y <sub>0.13</sub> O <sub>1.93</sub> | 673 | 1.5  |
| Bi <sub>0.8</sub> Ba <sub>0.2</sub> CuSeO             | 725 | 0.69 |  | (Zr <sub>0.5</sub> Hf <sub>0.5</sub> ) <sub>0.87</sub> Y <sub>0.13</sub> O <sub>1.93</sub> | 773 | 1.52 |
| Bi <sub>0.8</sub> Ba <sub>0.2</sub> CuSeO             | 825 | 0.69 |  | Ba <sub>8.01</sub> Ga <sub>15.83</sub> Zn <sub>0.019</sub> Sn <sub>30.15</sub>             | 300 | 0.86 |
| Cu <sub>1.9</sub> Ag <sub>0.1</sub> SnSe <sub>3</sub> | 300 | 1.19 |  | Ba <sub>8.01</sub> Ga <sub>15.83</sub> Zn <sub>0.019</sub> Sn <sub>30.15</sub>             | 340 | 0.83 |
| Cu <sub>1.9</sub> Ag <sub>0.1</sub> SnSe <sub>3</sub> | 400 | 0.97 |  | Ba <sub>8.01</sub> Ga <sub>15.83</sub> Zn <sub>0.019</sub> Sn <sub>30.15</sub>             | 380 | 0.79 |
| Cu <sub>1.9</sub> Ag <sub>0.1</sub> SnSe <sub>3</sub> | 500 | 0.73 |  | Ba <sub>8.01</sub> Ga <sub>15.83</sub> Zn <sub>0.019</sub> Sn <sub>30.15</sub>             | 580 | 1.27 |
| Cu <sub>1.9</sub> Ag <sub>0.1</sub> SnSe <sub>3</sub> | 600 | 0.63 |  | Ba <sub>8.01</sub> Ga <sub>15.83</sub> Zn <sub>0.019</sub> Sn <sub>30.15</sub>             | 540 | 1.03 |
| Cu <sub>1.9</sub> Ag <sub>0.1</sub> SnSe <sub>3</sub> | 700 | 0.52 |  | Ba <sub>8.01</sub> Ga <sub>15.83</sub> Zn <sub>0.019</sub> Sn <sub>30.15</sub>             | 420 | 0.76 |
| Cu <sub>1.9</sub> Ag <sub>0.1</sub> SnSe <sub>3</sub> | 800 | 0.41 |  | Ba <sub>8.01</sub> Ga <sub>15.83</sub> Zn <sub>0.019</sub> Sn <sub>30.15</sub>             | 500 | 0.86 |
| Bi <sub>0.9</sub> Pb <sub>0.1</sub> CuSeO             | 50  | 2.04 |  | Ba <sub>8.01</sub> Ga <sub>15.83</sub> Zn <sub>0.019</sub> Sn <sub>30.15</sub>             | 460 | 0.78 |
| Bi <sub>0.9</sub> Pb <sub>0.1</sub> CuSeO             | 100 | 2.17 |  | Ba <sub>8.01</sub> Ga <sub>15.88</sub> Zn <sub>0.009</sub> Sn <sub>30.11</sub>             | 300 | 0.95 |
| Bi <sub>0.9</sub> Pb <sub>0.1</sub> CuSeO             | 150 | 2.17 |  | Ba <sub>8.01</sub> Ga <sub>15.88</sub> Zn <sub>0.009</sub> Sn <sub>30.11</sub>             | 340 | 0.88 |
| Bi <sub>0.9</sub> Pb <sub>0.1</sub> CuSeO             | 250 | 2.1  |  | Ba <sub>8.01</sub> Ga <sub>15.88</sub> Zn <sub>0.009</sub> Sn <sub>30.11</sub>             | 380 | 0.85 |
| Mg <sub>2</sub> Sn <sub>0.99</sub> Sb <sub>0.01</sub> | 350 | 6    |  | Ba <sub>8.01</sub> Ga <sub>15.88</sub> Zn <sub>0.009</sub> Sn <sub>30.11</sub>             | 420 | 0.83 |
| Mg <sub>2</sub> Sn <sub>0.99</sub> Sb <sub>0.01</sub> | 444 | 4.78 |  | Ba <sub>8.01</sub> Ga <sub>15.88</sub> Zn <sub>0.009</sub> Sn <sub>30.11</sub>             | 580 | 1.19 |
| Mg <sub>2</sub> Sn <sub>0.99</sub> Sb <sub>0.01</sub> | 544 | 4.65 |  | Ba <sub>8.01</sub> Ga <sub>15.88</sub> Zn <sub>0.009</sub> Sn <sub>30.11</sub>             | 460 | 0.82 |

|                                                                    |     |      |  |                                                                                                         |     |      |
|--------------------------------------------------------------------|-----|------|--|---------------------------------------------------------------------------------------------------------|-----|------|
| Mg <sub>2</sub> Sn <sub>0.99</sub> Sb <sub>0.01</sub>              | 646 | 4.43 |  | Ba <sub>8.01</sub> Ga <sub>15.88</sub> Zn <sub>0.009</sub> Sn <sub>30.11</sub>                          | 540 | 0.97 |
| Mg <sub>2</sub> Sn <sub>0.98</sub> Sb <sub>0.02</sub>              | 350 | 7.1  |  | Ba <sub>8.01</sub> Ga <sub>15.88</sub> Zn <sub>0.009</sub> Sn <sub>30.11</sub>                          | 500 | 0.86 |
| Mg <sub>2</sub> Sn <sub>0.98</sub> Sb <sub>0.02</sub>              | 444 | 5.73 |  | (Cu <sub>3</sub> Sn <sub>4</sub> ) <sub>0.875</sub> (Ga <sub>2</sub> Te <sub>3</sub> ) <sub>0.125</sub> | 331 | 2.41 |
| Mg <sub>2</sub> Sn <sub>0.98</sub> Sb <sub>0.02</sub>              | 544 | 5.17 |  | (Cu <sub>3</sub> Sn <sub>4</sub> ) <sub>0.875</sub> (Ga <sub>2</sub> Te <sub>3</sub> ) <sub>0.125</sub> | 429 | 2.19 |
| Mg <sub>2</sub> Sn <sub>0.98</sub> Sb <sub>0.02</sub>              | 646 | 4.67 |  | (Cu <sub>3</sub> Sn <sub>4</sub> ) <sub>0.875</sub> (Ga <sub>2</sub> Te <sub>3</sub> ) <sub>0.125</sub> | 527 | 1.93 |
| La <sub>1.7</sub> Gd <sub>0.3</sub> Zr <sub>2</sub> O <sub>7</sub> | 573 | 2.84 |  | (Cu <sub>3</sub> Sn <sub>4</sub> ) <sub>0.875</sub> (Ga <sub>2</sub> Te <sub>3</sub> ) <sub>0.125</sub> | 624 | 1.68 |
| La <sub>1.7</sub> Gd <sub>0.3</sub> Zr <sub>2</sub> O <sub>7</sub> | 600 | 2.68 |  | (Cu <sub>3</sub> Sn <sub>4</sub> ) <sub>0.875</sub> (Ga <sub>2</sub> Te <sub>3</sub> ) <sub>0.125</sub> | 674 | 1.53 |
| La <sub>1.7</sub> Gd <sub>0.3</sub> Zr <sub>2</sub> O <sub>7</sub> | 650 | 2.59 |  | (Cu <sub>3</sub> Sn <sub>4</sub> ) <sub>0.875</sub> (Ga <sub>2</sub> Te <sub>3</sub> ) <sub>0.125</sub> | 741 | 1.38 |
| La <sub>1.7</sub> Gd <sub>0.3</sub> Zr <sub>2</sub> O <sub>7</sub> | 673 | 2.5  |  | (Cu <sub>3</sub> Sn <sub>4</sub> ) <sub>0.895</sub> (Ga <sub>2</sub> Te <sub>3</sub> ) <sub>0.105</sub> | 331 | 2.95 |
| La <sub>1.7</sub> Gd <sub>0.3</sub> Zr <sub>2</sub> O <sub>7</sub> | 700 | 2.43 |  | (Cu <sub>3</sub> Sn <sub>4</sub> ) <sub>0.895</sub> (Ga <sub>2</sub> Te <sub>3</sub> ) <sub>0.105</sub> | 405 | 2.89 |
| La <sub>1.7</sub> Yb <sub>0.3</sub> Zr <sub>2</sub> O <sub>7</sub> | 550 | 2.67 |  | (Cu <sub>3</sub> Sn <sub>4</sub> ) <sub>0.895</sub> (Ga <sub>2</sub> Te <sub>3</sub> ) <sub>0.105</sub> | 479 | 2.64 |
| La <sub>1.7</sub> Yb <sub>0.3</sub> Zr <sub>2</sub> O <sub>7</sub> | 580 | 2.35 |  | (Cu <sub>3</sub> Sn <sub>4</sub> ) <sub>0.895</sub> (Ga <sub>2</sub> Te <sub>3</sub> ) <sub>0.105</sub> | 554 | 2.36 |
| La <sub>1.7</sub> Yb <sub>0.3</sub> Zr <sub>2</sub> O <sub>7</sub> | 620 | 2.23 |  | (Cu <sub>3</sub> Sn <sub>4</sub> ) <sub>0.895</sub> (Ga <sub>2</sub> Te <sub>3</sub> ) <sub>0.105</sub> | 627 | 2.27 |
| La <sub>1.7</sub> Yb <sub>0.3</sub> Zr <sub>2</sub> O <sub>7</sub> | 673 | 2.24 |  | (Cu <sub>3</sub> Sn <sub>4</sub> ) <sub>0.895</sub> (Ga <sub>2</sub> Te <sub>3</sub> ) <sub>0.105</sub> | 700 | 2.18 |
| La <sub>1.7</sub> Yb <sub>0.3</sub> Zr <sub>2</sub> O <sub>7</sub> | 710 | 2.16 |  | (Cu <sub>3</sub> Sn <sub>4</sub> ) <sub>0.895</sub> (Ga <sub>2</sub> Te <sub>3</sub> ) <sub>0.105</sub> | 746 | 1.48 |
| Ca <sub>2.5</sub> Bi <sub>0.5</sub> Co <sub>4</sub> O <sub>9</sub> | 310 | 1.11 |  | (Cu <sub>3</sub> Sn <sub>4</sub> ) <sub>0.895</sub> (Ga <sub>2</sub> Te <sub>3</sub> ) <sub>0.105</sub> | 798 | 0.83 |
| Ca <sub>2.5</sub> Bi <sub>0.5</sub> Co <sub>4</sub> O <sub>9</sub> | 380 | 1.14 |  | (Cu <sub>3</sub> Sn <sub>4</sub> ) <sub>0.915</sub> (Ga <sub>2</sub> Te <sub>3</sub> ) <sub>0.085</sub> | 331 | 3.84 |
| Ca <sub>2.5</sub> Bi <sub>0.5</sub> Co <sub>4</sub> O <sub>9</sub> | 480 | 1.15 |  | (Cu <sub>3</sub> Sn <sub>4</sub> ) <sub>0.915</sub> (Ga <sub>2</sub> Te <sub>3</sub> ) <sub>0.085</sub> | 405 | 3.74 |
| Ca <sub>2.5</sub> Bi <sub>0.5</sub> Co <sub>4</sub> O <sub>9</sub> | 580 | 1.22 |  | (Cu <sub>3</sub> Sn <sub>4</sub> ) <sub>0.915</sub> (Ga <sub>2</sub> Te <sub>3</sub> ) <sub>0.085</sub> | 479 | 3.43 |
| Ca <sub>2.5</sub> Bi <sub>0.5</sub> Co <sub>4</sub> O <sub>9</sub> | 680 | 1.19 |  | (Cu <sub>3</sub> Sn <sub>4</sub> ) <sub>0.915</sub> (Ga <sub>2</sub> Te <sub>3</sub> ) <sub>0.085</sub> | 554 | 3.18 |
| Ca <sub>3</sub> Co <sub>3.8</sub> Fe <sub>0.2</sub> O <sub>9</sub> | 330 | 1.48 |  | (Cu <sub>3</sub> Sn <sub>4</sub> ) <sub>0.915</sub> (Ga <sub>2</sub> Te <sub>3</sub> ) <sub>0.085</sub> | 627 | 3.15 |
| Ca <sub>3</sub> Co <sub>3.8</sub> Fe <sub>0.2</sub> O <sub>9</sub> | 480 | 1.45 |  | (Cu <sub>3</sub> Sn <sub>4</sub> ) <sub>0.915</sub> (Ga <sub>2</sub> Te <sub>3</sub> ) <sub>0.085</sub> | 700 | 2.77 |
| Ca <sub>3</sub> Co <sub>3.8</sub> Fe <sub>0.2</sub> O <sub>9</sub> | 600 | 1.42 |  | (Cu <sub>3</sub> Sn <sub>4</sub> ) <sub>0.915</sub> (Ga <sub>2</sub> Te <sub>3</sub> ) <sub>0.085</sub> | 741 | 1.98 |
| Ca <sub>3</sub> Co <sub>3.8</sub> Fe <sub>0.2</sub> O <sub>9</sub> | 730 | 1.4  |  | (Cu <sub>3</sub> Sn <sub>4</sub> ) <sub>0.915</sub> (Ga <sub>2</sub> Te <sub>3</sub> ) <sub>0.085</sub> | 798 | 0.93 |
| Bi <sub>2</sub> Sr <sub>1.8</sub> Co <sub>2</sub> O <sub>7.7</sub> | 473 | 0.8  |  | Ge <sub>0.6</sub> Sb <sub>0.2</sub> Te <sub>0.8</sub> (AgSnSe <sub>2</sub> ) <sub>0.2</sub>             | 323 | 0.83 |
| Na <sub>0.03</sub> Sn <sub>0.965</sub> Se                          | 300 | 0.6  |  | Ge <sub>0.6</sub> Sb <sub>0.2</sub> Te <sub>0.8</sub> (AgSnSe <sub>2</sub> ) <sub>0.2</sub>             | 423 | 0.84 |
| Na <sub>0.03</sub> Sn <sub>0.965</sub> Se                          | 330 | 0.57 |  | Ge <sub>0.6</sub> Sb <sub>0.2</sub> Te <sub>0.8</sub> (AgSnSe <sub>2</sub> ) <sub>0.2</sub>             | 523 | 0.81 |
| Na <sub>0.03</sub> Sn <sub>0.965</sub> Se                          | 370 | 0.48 |  | Ge <sub>0.6</sub> Sb <sub>0.2</sub> Te <sub>0.8</sub> (AgSnSe <sub>2</sub> ) <sub>0.2</sub>             | 623 | 0.79 |
| Na <sub>0.03</sub> Sn <sub>0.965</sub> Se                          | 430 | 0.42 |  | Ge <sub>0.6</sub> Sb <sub>0.2</sub> Te <sub>0.8</sub> (AgSnSe <sub>2</sub> ) <sub>0.2</sub>             | 723 | 0.93 |
| Na <sub>0.03</sub> Sn <sub>0.965</sub> Se                          | 480 | 0.36 |  | Mg <sub>2.16</sub> (Si <sub>0.4</sub> Sn <sub>0.6</sub> ) <sub>0.97</sub> Bi <sub>0.03</sub>            | 300 | 2.77 |
| Na <sub>0.03</sub> Sn <sub>0.965</sub> Se                          | 530 | 0.32 |  | Mg <sub>2.16</sub> (Si <sub>0.4</sub> Sn <sub>0.6</sub> ) <sub>0.97</sub> Bi <sub>0.03</sub>            | 400 | 2.55 |
| Na <sub>0.03</sub> Sn <sub>0.965</sub> Se                          | 580 | 0.28 |  | Mg <sub>2.16</sub> (Si <sub>0.4</sub> Sn <sub>0.6</sub> ) <sub>0.97</sub> Bi <sub>0.03</sub>            | 500 | 2.39 |

|                                                        |     |      |  |                                                                                                |     |      |
|--------------------------------------------------------|-----|------|--|------------------------------------------------------------------------------------------------|-----|------|
| Na <sub>0.03</sub> Sn <sub>0.965</sub> Se              | 630 | 0.24 |  | Mg <sub>2.16</sub> (Si <sub>0.4</sub> Sn <sub>0.6</sub> ) <sub>0.97</sub> Bi <sub>0.03</sub>   | 600 | 2.3  |
| Na <sub>0.03</sub> Sn <sub>0.965</sub> Se              | 680 | 0.22 |  | Mg <sub>2.16</sub> (Si <sub>0.4</sub> Sn <sub>0.6</sub> ) <sub>0.97</sub> Bi <sub>0.03</sub>   | 700 | 2.28 |
| Sr <sub>0.21</sub> Co <sub>4</sub> Sb <sub>12.25</sub> | 300 | 4.87 |  | Mg <sub>2.16</sub> (Si <sub>0.4</sub> Sn <sub>0.6</sub> ) <sub>0.97</sub> Bi <sub>0.03</sub>   | 800 | 2.33 |
| Sr <sub>0.21</sub> Co <sub>4</sub> Sb <sub>12.25</sub> | 350 | 4.58 |  | Mg <sub>2.16</sub> (Si <sub>0.4</sub> Sn <sub>0.6</sub> ) <sub>0.98</sub> Bi <sub>0.02</sub>   | 300 | 2.77 |
| Sr <sub>0.21</sub> Co <sub>4</sub> Sb <sub>12.25</sub> | 400 | 4.29 |  | Mg <sub>2.16</sub> (Si <sub>0.4</sub> Sn <sub>0.6</sub> ) <sub>0.98</sub> Bi <sub>0.02</sub>   | 400 | 2.52 |
| Sr <sub>0.21</sub> Co <sub>4</sub> Sb <sub>12.25</sub> | 450 | 4.11 |  | Mg <sub>2.16</sub> (Si <sub>0.4</sub> Sn <sub>0.6</sub> ) <sub>0.98</sub> Bi <sub>0.02</sub>   | 500 | 2.37 |
| Sr <sub>0.21</sub> Co <sub>4</sub> Sb <sub>12.25</sub> | 500 | 3.92 |  | Mg <sub>2.16</sub> (Si <sub>0.4</sub> Sn <sub>0.6</sub> ) <sub>0.98</sub> Bi <sub>0.02</sub>   | 600 | 2.29 |
| Sr <sub>0.21</sub> Co <sub>4</sub> Sb <sub>12.25</sub> | 550 | 3.8  |  | Mg <sub>2.16</sub> (Si <sub>0.4</sub> Sn <sub>0.6</sub> ) <sub>0.98</sub> Bi <sub>0.02</sub>   | 700 | 2.27 |
| Sr <sub>0.21</sub> Co <sub>4</sub> Sb <sub>12.25</sub> | 600 | 3.68 |  | Mg <sub>2.16</sub> (Si <sub>0.4</sub> Sn <sub>0.6</sub> ) <sub>0.98</sub> Bi <sub>0.02</sub>   | 800 | 2.31 |
| Sr <sub>0.21</sub> Co <sub>4</sub> Sb <sub>12.25</sub> | 650 | 3.65 |  | Mg <sub>2.16</sub> (Si <sub>0.4</sub> Sn <sub>0.6</sub> ) <sub>0.99</sub> Bi <sub>0.01</sub>   | 300 | 2.55 |
| Sr <sub>0.21</sub> Co <sub>4</sub> Sb <sub>12.25</sub> | 700 | 3.62 |  | Mg <sub>2.16</sub> (Si <sub>0.4</sub> Sn <sub>0.6</sub> ) <sub>0.99</sub> Bi <sub>0.01</sub>   | 400 | 2.24 |
| Sr <sub>0.21</sub> Co <sub>4</sub> Sb <sub>12.25</sub> | 750 | 3.65 |  | Mg <sub>2.16</sub> (Si <sub>0.4</sub> Sn <sub>0.6</sub> ) <sub>0.99</sub> Bi <sub>0.01</sub>   | 500 | 2.05 |
| Sr <sub>0.21</sub> Co <sub>4</sub> Sb <sub>12.25</sub> | 800 | 3.68 |  | Mg <sub>2.16</sub> (Si <sub>0.4</sub> Sn <sub>0.6</sub> ) <sub>0.99</sub> Bi <sub>0.01</sub>   | 600 | 1.99 |
| Sr <sub>0.21</sub> Co <sub>4</sub> Sb <sub>12.25</sub> | 850 | 3.8  |  | Mg <sub>2.16</sub> (Si <sub>0.4</sub> Sn <sub>0.6</sub> ) <sub>0.99</sub> Bi <sub>0.01</sub>   | 800 | 2.2  |
| AgSn <sub>15.0</sub> BiTe <sub>17.0</sub>              | 300 | 2.6  |  | Mg <sub>2.16</sub> (Si <sub>0.4</sub> Sn <sub>0.6</sub> ) <sub>0.99</sub> Bi <sub>0.01</sub>   | 700 | 2.04 |
| AgSn <sub>15.0</sub> BiTe <sub>17.0</sub>              | 400 | 2.41 |  | Ge <sub>0.55</sub> Sb <sub>0.25</sub> Te <sub>0.8</sub> (AgSnSe <sub>2</sub> ) <sub>0.2</sub>  | 323 | 0.76 |
| AgSn <sub>15.0</sub> BiTe <sub>17.0</sub>              | 500 | 2.09 |  | Ge <sub>0.55</sub> Sb <sub>0.25</sub> Te <sub>0.8</sub> (AgSnSe <sub>2</sub> ) <sub>0.2</sub>  | 423 | 0.76 |
| AgSn <sub>15.0</sub> BiTe <sub>17.0</sub>              | 600 | 1.77 |  | Ge <sub>0.55</sub> Sb <sub>0.25</sub> Te <sub>0.8</sub> (AgSnSe <sub>2</sub> ) <sub>0.2</sub>  | 523 | 0.72 |
| AgSn <sub>25.0</sub> BiTe <sub>27.0</sub>              | 300 | 3.41 |  | Ge <sub>0.55</sub> Sb <sub>0.25</sub> Te <sub>0.8</sub> (AgSnSe <sub>2</sub> ) <sub>0.2</sub>  | 623 | 0.74 |
| AgSn <sub>25.0</sub> BiTe <sub>27.0</sub>              | 400 | 3.19 |  | Ge <sub>0.55</sub> Sb <sub>0.25</sub> Te <sub>0.8</sub> (AgSnSe <sub>2</sub> ) <sub>0.2</sub>  | 723 | 0.88 |
| AgSn <sub>25.0</sub> BiTe <sub>27.0</sub>              | 500 | 2.87 |  | Ge <sub>0.58</sub> Sb <sub>0.22</sub> Te <sub>0.8</sub> (AgSnSe <sub>2</sub> ) <sub>0.2</sub>  | 323 | 0.74 |
| AgSn <sub>25.0</sub> BiTe <sub>27.0</sub>              | 600 | 2.53 |  | Ge <sub>0.58</sub> Sb <sub>0.22</sub> Te <sub>0.8</sub> (AgSnSe <sub>2</sub> ) <sub>0.2</sub>  | 423 | 0.74 |
| Sr <sub>15</sub> Ga <sub>29.5</sub> Ge <sub>55.6</sub> | 375 | 1.02 |  | Ge <sub>0.58</sub> Sb <sub>0.22</sub> Te <sub>0.8</sub> (AgSnSe <sub>2</sub> ) <sub>0.2</sub>  | 523 | 0.69 |
| Sr <sub>15</sub> Ga <sub>29.5</sub> Ge <sub>55.6</sub> | 774 | 1.56 |  | Ge <sub>0.58</sub> Sb <sub>0.22</sub> Te <sub>0.8</sub> (AgSnSe <sub>2</sub> ) <sub>0.2</sub>  | 623 | 0.71 |
| Sr <sub>15</sub> Ga <sub>29.5</sub> Ge <sub>55.6</sub> | 468 | 1.05 |  | Ge <sub>0.58</sub> Sb <sub>0.22</sub> Te <sub>0.8</sub> (AgSnSe <sub>2</sub> ) <sub>0.2</sub>  | 723 | 0.86 |
| Sr <sub>15</sub> Ga <sub>29.5</sub> Ge <sub>55.6</sub> | 568 | 1.21 |  | (Sn <sub>0.9</sub> Pb <sub>0.1</sub> Se) <sub>0.6</sub> (AgSbTe <sub>2</sub> ) <sub>0.4</sub>  | 523 | 0.68 |
| Sr <sub>15</sub> Ga <sub>29.5</sub> Ge <sub>55.6</sub> | 669 | 1.22 |  | Mg <sub>2.16</sub> (Si <sub>0.4</sub> Sn <sub>0.6</sub> ) <sub>0.985</sub> Bi <sub>0.015</sub> | 300 | 2.68 |
| LaCo <sub>0.75</sub> Fe <sub>0.25</sub> O <sub>3</sub> | 300 | 0.31 |  | Mg <sub>2.16</sub> (Si <sub>0.4</sub> Sn <sub>0.6</sub> ) <sub>0.985</sub> Bi <sub>0.015</sub> | 400 | 2.44 |
| LaCo <sub>0.75</sub> Ni <sub>0.25</sub> O <sub>3</sub> | 300 | 0.33 |  | Mg <sub>2.16</sub> (Si <sub>0.4</sub> Sn <sub>0.6</sub> ) <sub>0.985</sub> Bi <sub>0.015</sub> | 500 | 2.27 |
| LaCo <sub>0.95</sub> Fe <sub>0.05</sub> O <sub>3</sub> | 300 | 0.29 |  | Mg <sub>2.16</sub> (Si <sub>0.4</sub> Sn <sub>0.6</sub> ) <sub>0.985</sub> Bi <sub>0.015</sub> | 600 | 2.19 |
| LaCo <sub>0.95</sub> Ni <sub>0.05</sub> O <sub>3</sub> | 300 | 0.55 |  | Mg <sub>2.16</sub> (Si <sub>0.4</sub> Sn <sub>0.6</sub> ) <sub>0.985</sub> Bi <sub>0.015</sub> | 700 | 2.19 |
| La <sub>0.15</sub> Ca <sub>0.85</sub> TiO <sub>3</sub> | 432 | 3.85 |  | Mg <sub>2.16</sub> (Si <sub>0.4</sub> Sn <sub>0.6</sub> ) <sub>0.985</sub> Bi <sub>0.015</sub> | 800 | 2.27 |

|                                                        |      |      |  |                                                                                                                 |     |      |
|--------------------------------------------------------|------|------|--|-----------------------------------------------------------------------------------------------------------------|-----|------|
| La <sub>0.15</sub> Ca <sub>0.85</sub> TiO <sub>3</sub> | 538  | 3.5  |  | Mg <sub>2.16</sub> (Si <sub>0.4</sub> Sn <sub>0.6</sub> ) <sub>0.995</sub> Bi <sub>0.005</sub>                  | 300 | 2.26 |
| La <sub>0.15</sub> Ca <sub>0.85</sub> TiO <sub>3</sub> | 640  | 3.21 |  | Mg <sub>2.16</sub> (Si <sub>0.4</sub> Sn <sub>0.6</sub> ) <sub>0.995</sub> Bi <sub>0.005</sub>                  | 520 | 1.77 |
| La <sub>0.15</sub> Ca <sub>0.85</sub> TiO <sub>3</sub> | 740  | 3.04 |  | Mg <sub>2.16</sub> (Si <sub>0.4</sub> Sn <sub>0.6</sub> ) <sub>0.995</sub> Bi <sub>0.005</sub>                  | 760 | 2.04 |
| La <sub>0.25</sub> Ca <sub>0.75</sub> TiO <sub>3</sub> | 321  | 4.06 |  | Mg <sub>2.16</sub> (Si <sub>0.4</sub> Sn <sub>0.6</sub> ) <sub>0.995</sub> Bi <sub>0.005</sub>                  | 620 | 1.74 |
| La <sub>0.25</sub> Ca <sub>0.75</sub> TiO <sub>3</sub> | 432  | 3.66 |  | Ti <sub>0.925</sub> Mn <sub>0.075</sub> NiSn <sub>0.925</sub> Sb <sub>0.075</sub>                               | 297 | 7.13 |
| La <sub>0.25</sub> Ca <sub>0.75</sub> TiO <sub>3</sub> | 538  | 3.3  |  | Ti <sub>0.925</sub> Mn <sub>0.075</sub> NiSn <sub>0.925</sub> Sb <sub>0.075</sub>                               | 398 | 6.77 |
| La <sub>0.25</sub> Ca <sub>0.75</sub> TiO <sub>3</sub> | 640  | 3.07 |  | Ti <sub>0.925</sub> Mn <sub>0.075</sub> NiSn <sub>0.925</sub> Sb <sub>0.075</sub>                               | 498 | 6.45 |
| La <sub>0.25</sub> Ca <sub>0.75</sub> TiO <sub>3</sub> | 740  | 2.97 |  | Ti <sub>0.925</sub> Mn <sub>0.075</sub> NiSn <sub>0.925</sub> Sb <sub>0.075</sub>                               | 598 | 6.22 |
| La <sub>0.25</sub> Ca <sub>0.75</sub> TiO <sub>3</sub> | 840  | 2.9  |  | Ti <sub>0.925</sub> Mn <sub>0.075</sub> NiSn <sub>0.925</sub> Sb <sub>0.075</sub>                               | 697 | 5.97 |
| La <sub>0.25</sub> Ca <sub>0.75</sub> TiO <sub>3</sub> | 1016 | 2.65 |  | Ti <sub>0.925</sub> Mn <sub>0.075</sub> NiSn <sub>0.925</sub> Sb <sub>0.075</sub>                               | 797 | 5.9  |
| Mg <sub>2.16</sub> Si <sub>0.4</sub> Sn <sub>0.6</sub> | 620  | 1.7  |  | Ti <sub>0.925</sub> Mn <sub>0.075</sub> NiSn <sub>0.925</sub> Sb <sub>0.075</sub>                               | 871 | 5.89 |
| Mg <sub>2.16</sub> Si <sub>0.4</sub> Sn <sub>0.6</sub> | 760  | 2.41 |  | (Sn <sub>0.985</sub> In <sub>0.015</sub> Te) <sub>0.9</sub> (AgCl) <sub>0.1</sub>                               | 323 | 3.89 |
| Cu <sub>5.133</sub> Sn <sub>1.866</sub> S <sub>7</sub> | 300  | 6.56 |  | (Sn <sub>0.985</sub> In <sub>0.015</sub> Te) <sub>0.9</sub> (AgCl) <sub>0.1</sub>                               | 423 | 3.58 |
| Cu <sub>5.133</sub> Sn <sub>1.866</sub> S <sub>7</sub> | 415  | 5.21 |  | (Sn <sub>0.985</sub> In <sub>0.015</sub> Te) <sub>0.9</sub> (AgCl) <sub>0.1</sub>                               | 523 | 3.32 |
| Cu <sub>5.133</sub> Sn <sub>1.866</sub> S <sub>7</sub> | 515  | 4.28 |  | (Sn <sub>0.985</sub> In <sub>0.015</sub> Te) <sub>0.9</sub> (AgCl) <sub>0.1</sub>                               | 623 | 3    |
| Cu <sub>5.133</sub> Sn <sub>1.866</sub> S <sub>7</sub> | 617  | 3.64 |  | (Sn <sub>0.985</sub> In <sub>0.015</sub> Te) <sub>0.9</sub> (AgCl) <sub>0.1</sub>                               | 723 | 2.62 |
| Cu <sub>5.133</sub> Sn <sub>1.866</sub> S <sub>7</sub> | 667  | 3.35 |  | (Sn <sub>0.985</sub> In <sub>0.015</sub> Te) <sub>0.9</sub> (AgCl) <sub>0.1</sub>                               | 823 | 2.26 |
| ZrNiSn <sub>0.98</sub> Bi <sub>0.02</sub>              | 303  | 9.72 |  | (Sn <sub>0.985</sub> In <sub>0.015</sub> Te) <sub>0.95</sub> (AgCl) <sub>0.05</sub>                             | 323 | 5.57 |
| ZrNiSn <sub>0.98</sub> Bi <sub>0.02</sub>              | 475  | 7.84 |  | (Sn <sub>0.985</sub> In <sub>0.015</sub> Te) <sub>0.95</sub> (AgCl) <sub>0.05</sub>                             | 423 | 5.19 |
| ZrNiSn <sub>0.98</sub> Bi <sub>0.02</sub>              | 673  | 6.85 |  | (Sn <sub>0.985</sub> In <sub>0.015</sub> Te) <sub>0.95</sub> (AgCl) <sub>0.05</sub>                             | 523 | 4.7  |
| ZrNiSn <sub>0.98</sub> Bi <sub>0.02</sub>              | 771  | 6.75 |  | (Sn <sub>0.985</sub> In <sub>0.015</sub> Te) <sub>0.95</sub> (AgCl) <sub>0.05</sub>                             | 623 | 4.03 |
| ZrNiSn <sub>0.98</sub> Bi <sub>0.02</sub>              | 871  | 7    |  | (Sn <sub>0.985</sub> In <sub>0.015</sub> Te) <sub>0.95</sub> (AgCl) <sub>0.05</sub>                             | 723 | 3.63 |
| Cu <sub>2.075</sub> Sn <sub>0.925</sub> S <sub>3</sub> | 300  | 4.33 |  | (Sn <sub>0.985</sub> In <sub>0.015</sub> Te) <sub>0.85</sub> (AgCl) <sub>0.15</sub>                             | 323 | 4    |
| Cu <sub>2.075</sub> Sn <sub>0.925</sub> S <sub>3</sub> | 400  | 3.77 |  | (Sn <sub>0.985</sub> In <sub>0.015</sub> Te) <sub>0.85</sub> (AgCl) <sub>0.15</sub>                             | 423 | 3.59 |
| Cu <sub>2.075</sub> Sn <sub>0.925</sub> S <sub>3</sub> | 500  | 3.27 |  | (Sn <sub>0.985</sub> In <sub>0.015</sub> Te) <sub>0.85</sub> (AgCl) <sub>0.15</sub>                             | 523 | 3.37 |
| Cu <sub>2.075</sub> Sn <sub>0.925</sub> S <sub>3</sub> | 600  | 2.86 |  | (Sn <sub>0.985</sub> In <sub>0.015</sub> Te) <sub>0.85</sub> (AgCl) <sub>0.15</sub>                             | 623 | 2.98 |
| Cu <sub>2.075</sub> Sn <sub>0.925</sub> S <sub>3</sub> | 700  | 2.51 |  | (Sn <sub>0.985</sub> In <sub>0.015</sub> Te) <sub>0.85</sub> (AgCl) <sub>0.15</sub>                             | 723 | 2.58 |
| Ba <sub>1.4</sub> Bi <sub>0.6</sub> CoRuO <sub>6</sub> | 318  | 1.2  |  | (Sn <sub>0.985</sub> In <sub>0.015</sub> Te) <sub>0.85</sub> (AgCl) <sub>0.15</sub>                             | 823 | 2.18 |
| Ba <sub>1.4</sub> Bi <sub>0.6</sub> CoRuO <sub>6</sub> | 418  | 1.17 |  | (Ag <sub>0.1</sub> Sb <sub>0.1</sub> Sn <sub>0.8</sub> )(S <sub>0.1</sub> Se <sub>0.1</sub> Te <sub>0.8</sub> ) | 303 | 1.81 |
| Ba <sub>1.4</sub> Bi <sub>0.6</sub> CoRuO <sub>6</sub> | 518  | 1.14 |  | (Ag <sub>0.1</sub> Sb <sub>0.1</sub> Sn <sub>0.8</sub> )(S <sub>0.1</sub> Se <sub>0.1</sub> Te <sub>0.8</sub> ) | 434 | 1.7  |
| Ba <sub>1.4</sub> Bi <sub>0.6</sub> CoRuO <sub>6</sub> | 618  | 1.09 |  | (Ag <sub>0.1</sub> Sb <sub>0.1</sub> Sn <sub>0.8</sub> )(S <sub>0.1</sub> Se <sub>0.1</sub> Te <sub>0.8</sub> ) | 593 | 1.39 |
| Ba <sub>1.6</sub> Bi <sub>0.4</sub> CoRuO <sub>6</sub> | 318  | 1.32 |  | (Ag <sub>0.1</sub> Sb <sub>0.1</sub> Sn <sub>0.8</sub> )(S <sub>0.1</sub> Se <sub>0.1</sub> Te <sub>0.8</sub> ) | 755 | 1.43 |

|                                                        |     |      |  |                                                                                                                     |     |      |
|--------------------------------------------------------|-----|------|--|---------------------------------------------------------------------------------------------------------------------|-----|------|
| Ba <sub>1.6</sub> Bi <sub>0.4</sub> CoRuO <sub>6</sub> | 418 | 1.28 |  | (Ag <sub>0.1</sub> Sb <sub>0.1</sub> Sn <sub>0.8</sub> )(S <sub>0.1</sub> Se <sub>0.1</sub> Te <sub>0.8</sub> )     | 825 | 1.5  |
| Ba <sub>1.6</sub> Bi <sub>0.4</sub> CoRuO <sub>6</sub> | 518 | 1.25 |  | (Ag <sub>0.05</sub> Sb <sub>0.05</sub> Sn <sub>0.9</sub> )(S <sub>0.05</sub> Se <sub>0.05</sub> Te <sub>0.9</sub> ) | 303 | 3.39 |
| Ba <sub>1.6</sub> Bi <sub>0.4</sub> CoRuO <sub>6</sub> | 618 | 1.2  |  | (Ag <sub>0.05</sub> Sb <sub>0.05</sub> Sn <sub>0.9</sub> )(S <sub>0.05</sub> Se <sub>0.05</sub> Te <sub>0.9</sub> ) | 434 | 3.18 |
| Ba <sub>1.7</sub> Bi <sub>0.3</sub> CoRuO <sub>6</sub> | 518 | 1.3  |  | (Ag <sub>0.05</sub> Sb <sub>0.05</sub> Sn <sub>0.9</sub> )(S <sub>0.05</sub> Se <sub>0.05</sub> Te <sub>0.9</sub> ) | 594 | 2.5  |
| Ba <sub>1.8</sub> Bi <sub>0.2</sub> CoRuO <sub>6</sub> | 318 | 1.42 |  | (Ag <sub>0.05</sub> Sb <sub>0.05</sub> Sn <sub>0.9</sub> )(S <sub>0.05</sub> Se <sub>0.05</sub> Te <sub>0.9</sub> ) | 755 | 2.15 |
| Ba <sub>1.8</sub> Bi <sub>0.2</sub> CoRuO <sub>6</sub> | 418 | 1.36 |  | (Ag <sub>0.05</sub> Sb <sub>0.05</sub> Sn <sub>0.9</sub> )(S <sub>0.05</sub> Se <sub>0.05</sub> Te <sub>0.9</sub> ) | 823 | 2.07 |
| Ba <sub>1.8</sub> Bi <sub>0.2</sub> CoRuO <sub>6</sub> | 518 | 1.32 |  | (Ag <sub>0.15</sub> Sb <sub>0.15</sub> Sn <sub>0.7</sub> )(S <sub>0.15</sub> Se <sub>0.15</sub> Te <sub>0.7</sub> ) | 303 | 1.27 |
| Ba <sub>1.8</sub> Bi <sub>0.2</sub> CoRuO <sub>6</sub> | 318 | 1.39 |  | (Ag <sub>0.15</sub> Sb <sub>0.15</sub> Sn <sub>0.7</sub> )(S <sub>0.15</sub> Se <sub>0.15</sub> Te <sub>0.7</sub> ) | 432 | 1.19 |
| Ba <sub>1.8</sub> Bi <sub>0.2</sub> CoRuO <sub>6</sub> | 418 | 1.33 |  | (Ag <sub>0.15</sub> Sb <sub>0.15</sub> Sn <sub>0.7</sub> )(S <sub>0.15</sub> Se <sub>0.15</sub> Te <sub>0.7</sub> ) | 593 | 1.07 |
| Ba <sub>1.9</sub> Bi <sub>0.1</sub> CoRuO <sub>6</sub> | 318 | 1.44 |  | (Ag <sub>0.15</sub> Sb <sub>0.15</sub> Sn <sub>0.7</sub> )(S <sub>0.15</sub> Se <sub>0.15</sub> Te <sub>0.7</sub> ) | 753 | 1.19 |
| Ba <sub>1.9</sub> Bi <sub>0.1</sub> CoRuO <sub>6</sub> | 418 | 1.43 |  | (Ag <sub>0.15</sub> Sb <sub>0.15</sub> Sn <sub>0.7</sub> )(S <sub>0.15</sub> Se <sub>0.15</sub> Te <sub>0.7</sub> ) | 823 | 1.27 |
